# Supplementary material for: Elevated Levels of Lamin A Promote HR and NHEJ-Mediated Repair Mechanisms in High-Grade Ovarian Serous Carcinoma Cell Line
Source: MDPI journal article supplement (doi:10.3390/cells12050757), 2023-02-27
Supplement: s1 [file s1]

## Elevated levels of lamin A promote HR and NHEJ-mediated repair mechanisms in high-grade ovarian serous carcinoma cell line

Duhita Sengupta<sup>a,b</sup>, Asima Mukhopadhyay<sup>c</sup>, Kaushik Sengupta<sup>a,b\*</sup>

<sup>a</sup>Biophysics and Structural Genomics Division, Saha Institute of Nuclear Physics, Kolkata-700064, West Bengal, India

<sup>b</sup>Homi Bhabha National Institute, Training School Complex, Anushaktinagar, Mumbai- 400094, India

<sup>c</sup>Population Health Sciences Institute, Newcastle University NE2 4BN, United Kingdom

**Email:** [duhita.sengupta@saha.ac.in](mailto:duhita.sengupta@saha.ac.in)  
[kaushik.sengupta@saha.ac.in](mailto:kaushik.sengupta@saha.ac.in)  
[asima.mukhopadhyay@newcastle.ac.uk](mailto:asima.mukhopadhyay@newcastle.ac.uk)

**\*Correspondence:**

[kaushik.sengupta@saha.ac.in](mailto:kaushik.sengupta@saha.ac.in)

### Supporting Information file S1:

**Table S1.**

#### siRNA Sequence:

| siRNA   | Sequence                   |
|---------|----------------------------|
| siRNA 1 | 5'GGUGGUGACGAUCUGGGCU3'    |
| siRNA 2 | 5'AACUGGACUCCAGAAGAACAUC3' |

**Table S2.**

#### Antibodies:

| Name                                               | Company                   | Dilution               | Catalog no  |
|----------------------------------------------------|---------------------------|------------------------|-------------|
| Lamin A                                            | Sigma-Aldrich             | IF: 1:100 ; WB : 1:500 | L1293       |
| Lamin B                                            | SantaCruz                 | IF: 1:50 ; WB : 1:100  | sc-6217     |
| $\gamma$ H2AX                                      | EMD-Millipore             | IF: 1:50 ; WB : 1:1200 | 05-636-25UG |
| Rad51                                              | Abcam                     | IF: 1:50 ; WB : 1:500  | ab63801     |
| BRCA1                                              | EMD-Millipore             | IF: 1:50               | SAB2702136  |
| BRCA2                                              | Thermo Fischer Scientific | IF: 1:50               | 234403      |
| Ku70                                               | SantaCruz                 | IF: 1:50 ; WB : 1:1000 | sc-5309     |
| PCNA                                               | SantaCruz                 | IF: 1:50 ; WB : 1:500  | sc-56       |
| $\beta$ Actin                                      | Sigma-Aldrich             | WB : 1:1000            | A5316       |
| Anti-BrdU                                          | SantaCruz                 | IF : 1:50              | sc-32323    |
| Goat anti-Mouse IgG (H+L) Secondary Antibody, HRP  | Thermo Fischer Scientific | WB: 1:400              | 32430       |
| Goat anti-Rabbit IgG (H+L) Secondary Antibody, HRP | Thermo Fischer Scientific | WB: 1:400              | 32460       |

**Table S3.****Primer Sequences:**

| <b>Primer</b> | <b>Sequence</b>                                                                    |
|---------------|------------------------------------------------------------------------------------|
| GAPDH         | Forward: 5'- GAAGGTGAAGGTCGGAGTCAAC -3'<br>Reverse: 5'- CAGAGTTAAAAGCAGCCCTGGT -3' |
| LA            | Forward: 5'-CGGTTCCCACCAAAGTTCA -3'<br>Reverse: 5'-CTCATCCTCGTCGTCCTCAA -3'        |
| LB            | Forward: 5'- AAAAGACAACCTCTCGTCGCAT- 3'<br>Reverse: 5'-CCGCTTTCCTCTAGTTGTACG -3'   |
| Rad51         | Forward: 5'-TCTCTGGCAGTGATGTCCTGGA-3'<br>Reverse: 5'-TAAAGGGCGGTGGCACTGTCTA-3'     |
| BRCA1         | Forward: 5'-CTGAAGACTGCTCAGGGCTATC-3'<br>Reverse: 5'-AGGGTAGCTGTTAGAAGGCTGG-3'     |
| Ku70          | Forward: 5'-TGCCACAGGAAGAAGAGTTG-3'<br>Reverse: 5'-CTCTGGAGTTGCCATGATTT-3'         |
| PIF1          | Forward: 5'- GGTAAGGTACACAGATTTGAGGC-3'<br>Reverse: 5'-CCCGAGACACCGATAAGTTTT-3'    |
| RIF1          | Forward: 5'-TGTTGGAGACTTTGGAAGACC-3'<br>Reverse: 5'-ACTTTGTACAGCCGAGGAAG-3'        |
| BRCA2         | Forward: 5'-TTCATGGAGCAGAACTGGTG-3'<br>Reverse: 5'-AGGAAAAGGTCTAGGGTCAGG-3'        |
| FGF2          | Forward: 5'-ACCCTCACATCAAGCTACAAC-3'<br>Reverse: 5'-AAAAGAAACACTCATCCGTAACAC-3'    |
| TLR2          | Forward: 5'-TGGTAGTTGTGGGTTGAAGC-3'<br>Reverse: 5'- GACAGAGAAGCCTGATTGGAG-3'       |
| BIRC3         | Forward: 5'-AATGCTTTTGCTGTGATGGTG-3'<br>Reverse: 5'-GCTTGAACCTTGACGGATGAAC-3'      |
| THBS1         | Forward: 5'-CTCCCTATGCTATCACAACG-3'<br>Reverse: 5'-AGGAAGTGTGGCATTGGAG-3'          |
| PLK1          | Forward: 5'-ACAGTTTCGAGGTGGATGTG-3'<br>Reverse: 5'-GGTTGATGTGCTTGGAATAC-3'         |
| XRCC2         | Forward: 5'-CAGTTGGTGAATGGCGTTG-3'<br>Reverse: 5'-CTACCTTCAAGTCGGGCAAG-3'          |
| POLQ          | Forward: 5'-GCCAGGGTTCTCTATGCTTC-3'<br>Reverse: 5'-TCTTCAACTGCTTCCTCTTCC-3'        |
| MCM10         | Forward: 5'-AACCAGCCATCAAGTCCATC-3'<br>Reverse: 5'-TGGGCTCTCAACTTCACTTG-3'         |
| BRIP1         | Forward: 5'-GCTTAGCCTTACTTTGTTCTGC-3'<br>Reverse: 5'-TTTCACTTACGCCCTCATCTG-3'      |
| TP53          | Forward: 5'-GCCATCTACAAGCAGTCACAG-3'<br>Reverse: 5'-TCATCCAAATACTCCACACGC-3'       |
| MYC           | Forward: 5'-TTCGGGTAGTGGAACACCAG-3'<br>Reverse: 5'-AGTAGAAATACGGCTGCACC-3'         |
| TEAD4         | Forward: 5'-ATGTTGGAGTTCTCTGCCTTC-3'<br>Reverse: 5'-GGGAATTTGTCATAGATTGCGG-3'      |
| CTCF          | Forward: 5'-GCCATTCAAGTGTCCATGTG-3'<br>Reverse: 5'-CTCATGTGCCTTTTCAGCTTG-3'        |

## Supplementary Figures:

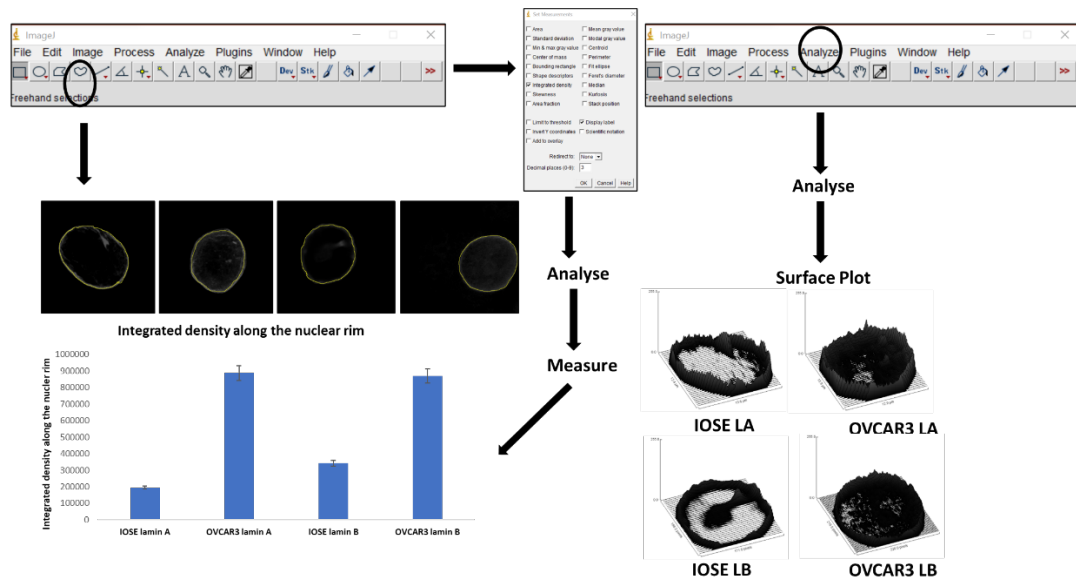

**Figure S1:** ImageJ work flow for measurement of fluorescence intensities in the nuclear rim. Fluorescence intensities in the nuclear rim have been measured in lamin A and lamin B stained IOSE and OVCAR3 nuclei. 20 nuclei from 10 different fields for each of the samples were used for quantification. Error bar indicates standard error.

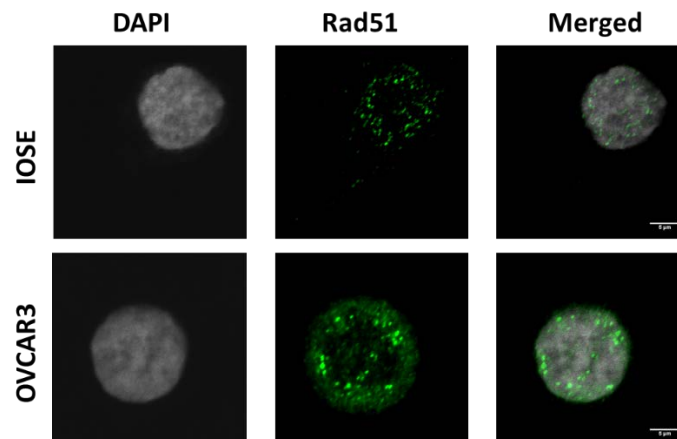

**Figure S2.** Confocal images of OVCAR3 and IOSE nuclei stained with Rad51. Magnification: 60X. Scale Bar: 5 $\mu$ m

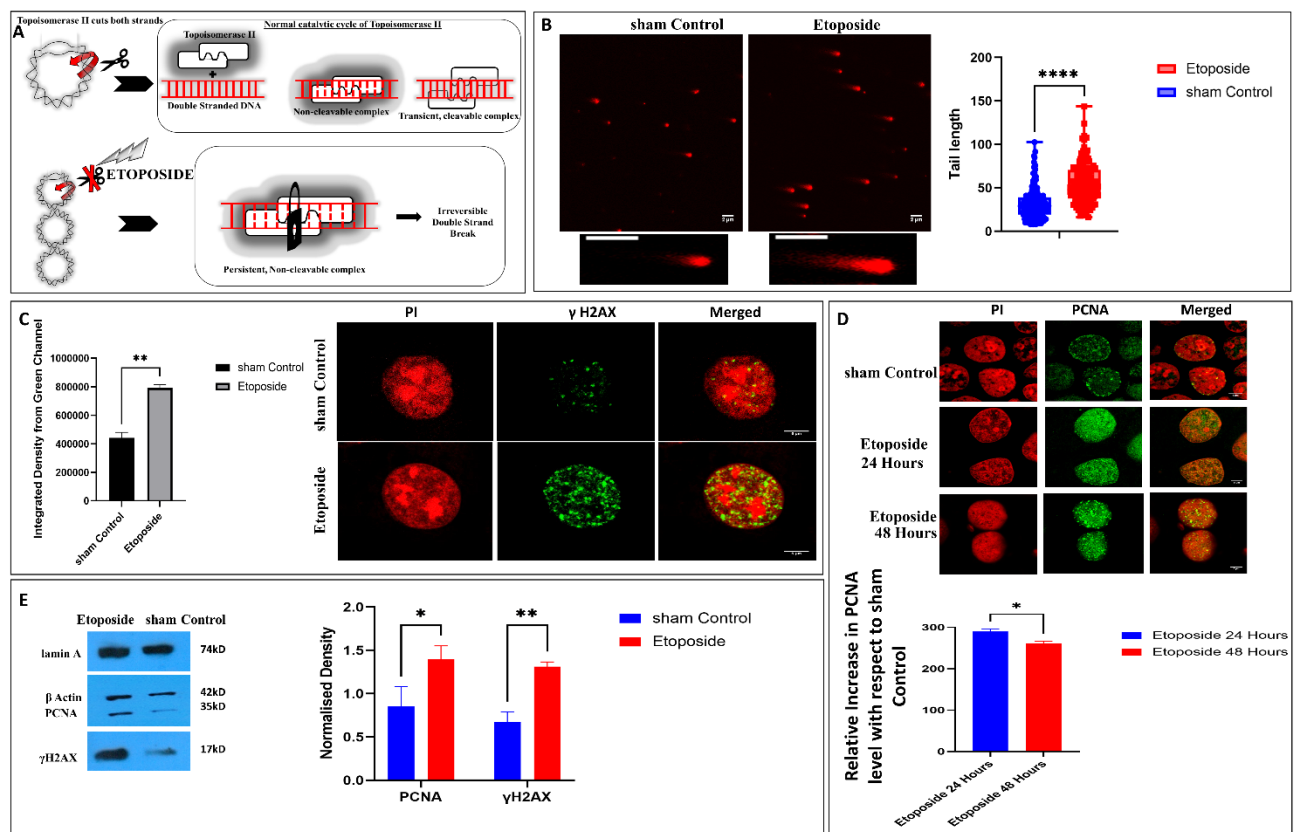

**Figure S3: OVCAR3 cells were induced to DNA damage by Etoposide.** A. Mode of action of the drug, Etoposide. B. Representative images of neutral comet assays. OVCAR3 cells were treated with Etoposide and investigated by neutral comet assays (Scale bar = 2µm). Tail length and intensities were measured by ImageJ. 15 nuclei from each field were analyzed. 10 such fields were used for quantification from each independent experiment. Error bar indicates standard error of mean. Statistical significance has been analysed by Paired t- test (parametric). p value output is in GP style [0.1234(ns), 0.0332(\*),0.0021(\*\*),0.0002(\*\*\*),<0.0001(\*\*\*)] C. Confocal micrographs showing the distribution of γH2AX in OVCAR3 cells before and after treatment. Magnification: 60X. Scale Bar; 5µm. The bar diagram shows the integrated density from the green channel (γH2AX). Error bar indicates standard error of mean. Statistical significance has been analysed by Paired t- test (parametric). p value output is in GP style [0.1234(ns), 0.0332(\*),0.0021(\*\*),0.0002(\*\*\*),<0.0001(\*\*\*)] D. Confocal micrographs showing the distribution of PCNA in OVCAR3 cells before and after treatment for 24 hours and 48 hours. Magnification: 60X. Scale Bar; 5µm. The bar diagram shows the integrated densities from the green channel at 24 hours and 48 hours normalized with green channel (PCNA) intensities of the sham Control. Error bar indicates standard error of mean. Statistical significance has been analysed by Paired t- test (parametric). p value output is in GP style [0.1234(ns), 0.0332(\*),0.0021(\*\*),0.0002(\*\*\*),<0.0001(\*\*\*)] E. Western Blots showing the level of γH2AX and PCNA. β Actin is used as the loading control. The bar graph shows the normalized density of γH2AX quantified from the blot in treated and untreated OVCAR3 cells. Error bar indicates standard error of mean. Statistical significance has been analysed by multiple t tests (Unpaired, using parametric test, assuming both samples from each row are from populations with the same SD). p value output is in GP style [0.1234(ns), 0.0332(\*),0.0021(\*\*),0.0002(\*\*\*),<0.0001(\*\*\*)]

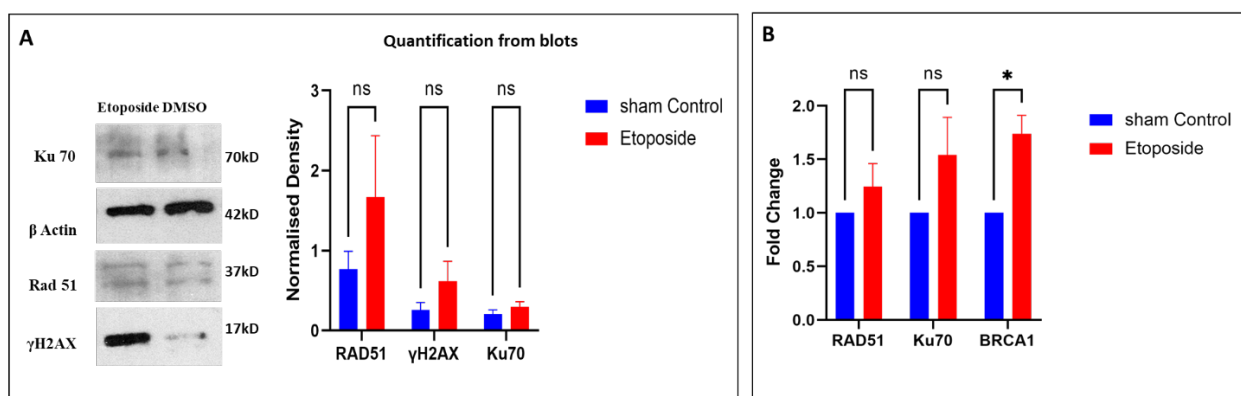

**Figure S4:** Western Blots showing the level of Ku70, Rad51, and  $\gamma$ H2AX in etoposide-treated and untreated OVCAR3 cells.  $\beta$  Actin is used as the loading control. **D.** qPCR showing fold changes of DNA Damage repair proteins in OVCAR3 cells treated with etoposide. Error bar indicates standard error of mean. Statistical significance has been analysed by multiple t tests (Unpaired, using parametric test, assuming both samples from each row are from populations with the same SD). p value output is in GP style [0.1234(ns), 0.0332(\*), 0.0021(\*\*), 0.0002(\*\*\*), <0.0001(\*\*\*\*)]

| Sample Name   | Overall Alignment Rate |
|---------------|------------------------|
| C1 (Mock)     | 91.30%                 |
| C2(Mock)      | 92.48%                 |
| D1(Etoposide) | 92.44%                 |
| D2(Etoposide) | 92.65%                 |

| Lane | Project | Sample | Barcode sequence  | PF Clusters | % of the lane | % Perfect barcode | % One mismatch barcode | Yield (Mbases) | % PF Clusters | % $\geq$ Q30 bases | Mean Quality Score |
|------|---------|--------|-------------------|-------------|---------------|-------------------|------------------------|----------------|---------------|--------------------|--------------------|
| 2    | default | C1     | TCTGCAAG+AAGGTGAA | 8,48,64,895 | 2.62          | 95.41             | 4.59                   | 16,973         | 100           | 93.52              | 35.86              |
| 2    | default | C2     | CAGCGGTA+CCAAGTCA | 8,76,81,562 | 2.71          | 97.62             | 2.38                   | 17,536         | 100           | 93.57              | 35.88              |
| 2    | default | D1     | CGCCTTCC+AAGTCCGC | 6,20,22,475 | 1.91          | 97.77             | 2.23                   | 12,404         | 100           | 93.72              | 35.91              |
| 2    | default | D2     | CAATAGTC+GTGAGCTG | 7,30,12,620 | 2.25          | 96.74             | 3.26                   | 14,603         | 100           | 93.77              | 35.92              |

**Figure S5:** Different quality control values and alignment rates of the samples used for RNA Sequencing.

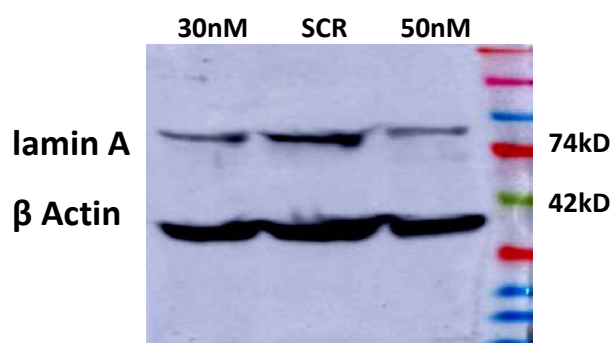

**Figure S6:** Western blot showing knockdown efficiency of different concentrations of siRNA complexes for lamin A.  $\beta$  Actin is used as loading control.

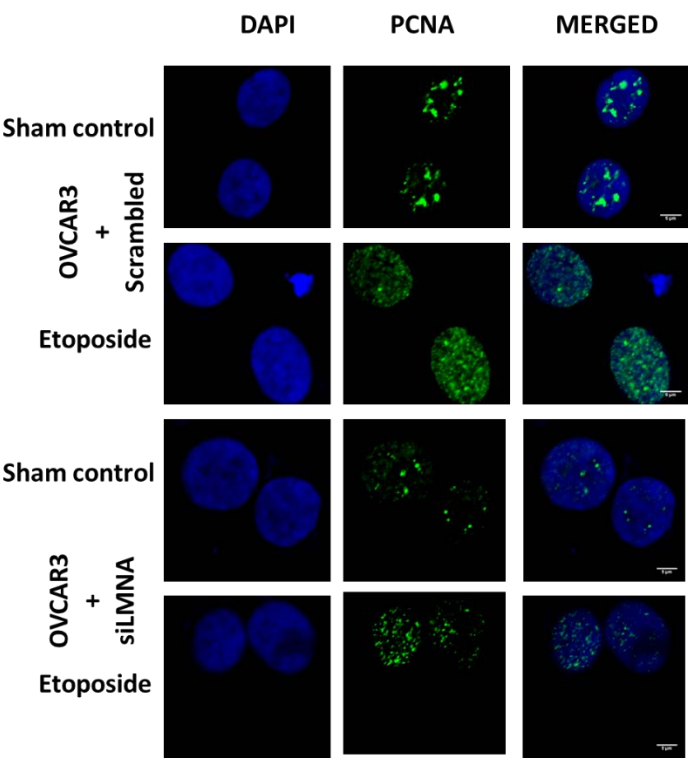

**Figure S7:** Immunofluorescence images of etoposide treated OVCAR3 nuclei following lamin A knockdown. The first panel shows DAPI staining and the third panel shows the merged images. Magnification: 60X. Scale Bar: 5 $\mu$ m.

Raw images of blots:

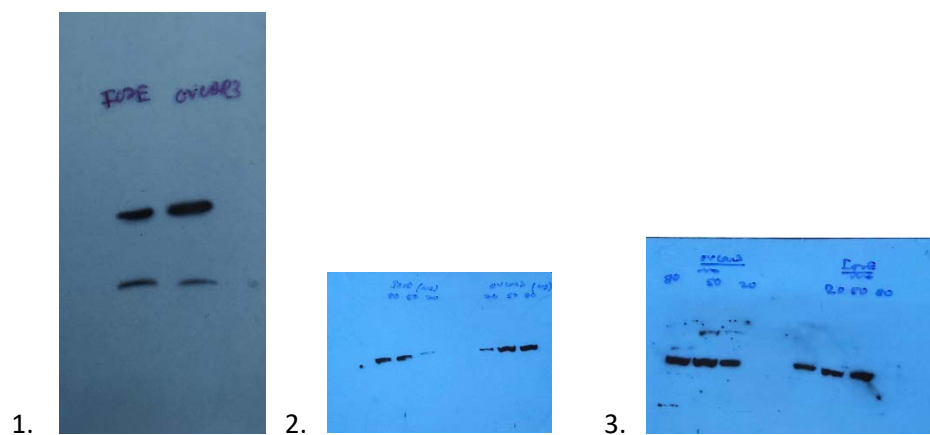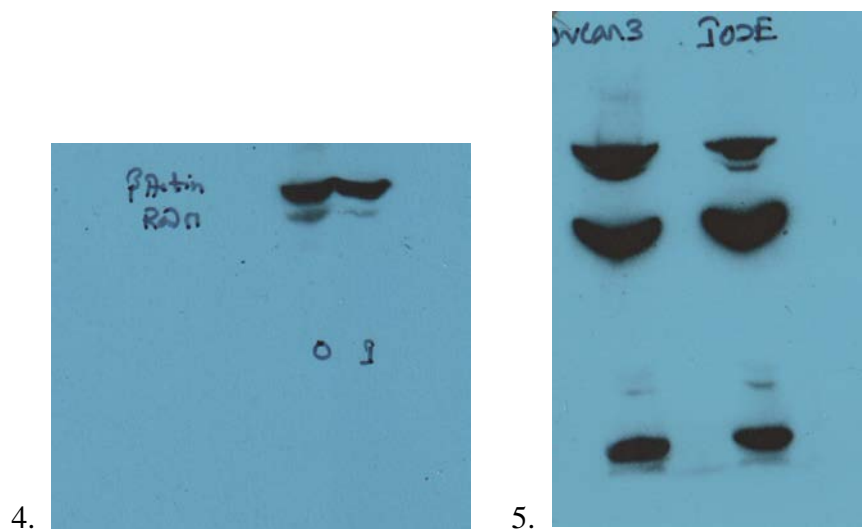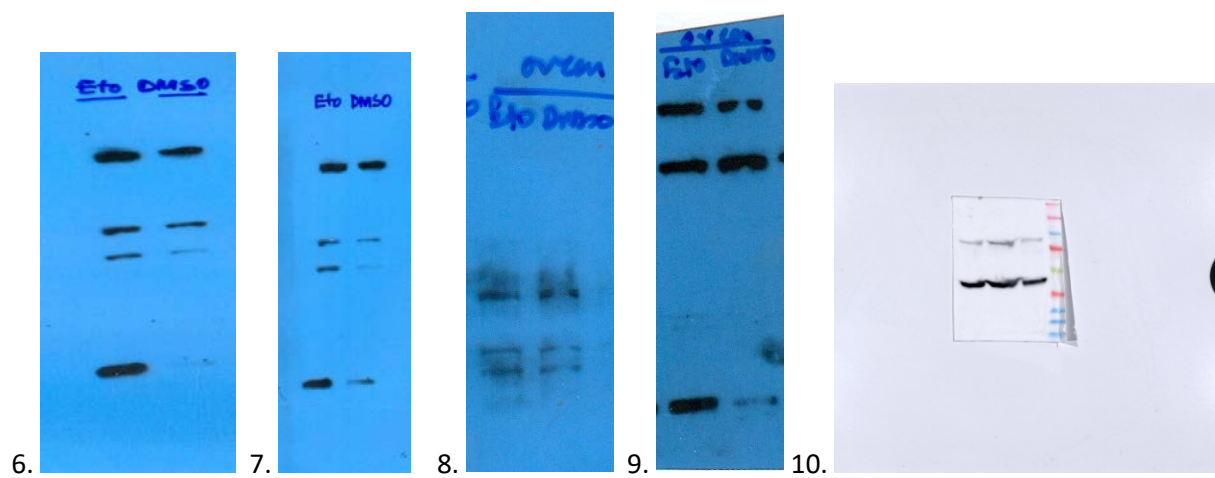

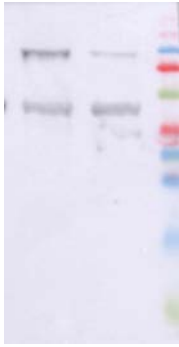

11.

1. lamin A (upper) (pAb)(Rabbit) and  $\beta$  Actin (lower)(mAb)(Mouse)
2. lamin B(pAb)(Goat) (3 no. blot was stripped and probed with lamin B)
3.  $\beta$  Actin(mAb)(Mouse)
4.  $\beta$  Actin(upper))(mAb)(Mouse), Rad 51 (pAb)(Rabbit) (lower)
5.  $\beta$  Actin (upper))(mAb)(Mouse),  $\gamma$ H2AX (lower)(mAb)(Mouse) ( upper most band denotes lamin A, but that has not been used in this paper. Lamin A blot has been freshly revised)
6. 7<sup>th</sup> blot in higher exposure time
7. lamin A (upper) (pAb)(Rabbit),  $\beta$  Actin (mAb)(Mouse), PCNA (mAb)(Mouse),  $\gamma$ H2AX (lower)(mAb)(Mouse)
8. Ku70 (mouse)(mAb), Rad51 (Rabbit)(pAb), 9 no. blot was stripped and probed with Ku70 and Rad51
9.  $\beta$  Actin (upper))(mAb)(Mouse),  $\gamma$ H2AX (lower)(mAb)(Mouse) ( upper most band denotes lamin A, but that has not been used in this paper.)
10. lamin A (upper) (pAb)(Rabbit) and  $\beta$  Actin (lower)(mAb)(Mouse)
11. lamin A (upper) (pAb)(Rabbit) and  $\beta$  Actin (lower)(mAb)(Mouse)
