# Supplementary material for: Elevated Levels of Lamin A Promote HR and NHEJ-Mediated Repair Mechanisms in High-Grade Ovarian Serous Carcinoma Cell Line
Source: Cells. 2023 Feb 27;12(5):757. doi: 10.3390/cells12050757 (PMC10001195; doi:10.3390/cells12050757)
Supplement: Supplementary file 1 [file cells-12-00757-s001.zip]

Archive with 5 entries (5 files):
- cells-2175413-Supplementary materials file S1.pdf
- cells-2175413-Supplementary materials file S2.xlsx
- cells-2175413-Supplementary materials file S3.csv
- cells-2175413-Supporting Information file S4.xlsx
- cells-2175413-Supporting Information file S5.tsv
