# Supplementary material for: Elevated Levels of Lamin A Promote HR and NHEJ-Mediated Repair Mechanisms in High-Grade Ovarian Serous Carcinoma Cell Line
Source: Cells. 2023 Feb 27;12(5):757. doi: 10.3390/cells12050757 (PMC10001195; doi:10.3390/cells12050757)
Supplement: Supplementary file 1 [file cells-12-00757-s001.zip › cells-2175413-Supplementary materials file S2.xlsx]

## Sheet: Human_Diff_exp_Deseq2.gene_coun
	baseMean	log2FoldChange	lfcSE	stat	pvalue	padj
ENSG00000284662|OR4F16	1.17047	-0.429942	3.59427	-0.119619	0.904785	NA
ENSG00000186827|TNFRSF4	4.53447	-5.49367	2.48693	-2.20902	0.0271732	NA
ENSG00000186891|TNFRSF18	14.8785	-0.465986	1.08262	-0.430424	0.666887	0.901387
ENSG00000160072|ATAD3B	12368.4	-0.07587	0.137201	-0.552986	0.580273	0.866142
ENSG00000041988|THAP3	2124.81	-0.0600066	0.126592	-0.474015	0.63549	0.888434
ENSG00000142611|PRDM16	61.336	-0.317885	0.586384	-0.542111	0.587742	0.868499
ENSG00000067606|PRKCZ	7187.31	-0.0141941	0.111394	-0.127423	0.898606	0.973684
ENSG00000131584|ACAP3	3473.27	-0.0703135	0.126716	-0.554891	0.578969	0.865665
ENSG00000169972|PUSL1	3526.27	-0.0554036	0.123225	-0.449613	0.65299	0.896484
ENSG00000157911|PEX10	4217.83	-0.223866	0.137297	-1.63053	0.10299	0.455543
ENSG00000224051|CPTP	7110.51	-0.189582	0.113599	-1.66887	0.0951426	0.439466
ENSG00000157933|SKI	33808.9	0.138744	0.0932454	1.48794	0.136766	0.511762
ENSG00000162591|MEGF6	1122.29	-0.0553474	0.144795	-0.382247	0.702278	0.915121
ENSG00000169962|TAS1R3	129.309	-0.427041	0.366748	-1.1644	0.244262	0.640788
ENSG00000116285|ERRFI1	9609.33	0.161157	0.107074	1.5051	0.132297	0.505243
ENSG00000142655|PEX14	5424.16	-0.325986	0.117035	-2.78538	0.00534645	0.101932
ENSG00000149527|PLCH2	8.94696	-0.0398855	1.4951	-0.0266775	0.978717	0.995375
ENSG00000007923|DNAJC11	33961.8	-0.0865008	0.0891868	-0.969884	0.332104	0.716684
ENSG00000171621|SPSB1	2857.76	0.039056	0.129786	0.300926	0.763471	0.935108
ENSG00000162441|LZIC	13463	-0.085093	0.089004	-0.956058	0.339043	0.722628
ENSG00000187017|ESPN	2496.13	-0.246139	0.140666	-1.7498	0.0801521	0.409808
ENSG00000285629	0	NA	NA	NA	NA	NA
ENSG00000173673|HES3	0	NA	NA	NA	NA	NA
ENSG00000142583|SLC2A5	8.75815	1.97059	1.7145	1.14937	0.250405	0.645601
ENSG00000107404|DVL1	14209.3	-0.163697	0.109083	-1.50066	0.133442	0.507174
ENSG00000177000|MTHFR	12141.4	-0.0923485	0.0940901	-0.981491	0.326351	0.712098
ENSG00000069424|KCNAB2	2787.93	0.0337117	0.112874	0.298668	0.765194	0.936002
ENSG00000074800|ENO1	365245	-0.260567	0.0919145	-2.83489	0.00458417	0.0930413
ENSG00000116786|PLEKHM2	24355.4	-0.0506643	0.0998664	-0.507321	0.61193	0.877721
ENSG00000176022|B3GALT6	10659.2	-0.18765	0.111827	-1.67803	0.0933413	0.436555
ENSG00000162496|DHRS3	977.077	-0.623022	0.164364	-3.79051	0.00015034	0.00906222
ENSG00000131686|CA6	4.76698	-5.56572	2.44551	-2.27589	0.0228525	NA
ENSG00000162494|LRRC38	0	NA	NA	NA	NA	NA
ENSG00000173614|NMNAT1	3755.57	-0.0177308	0.104646	-0.169436	0.865454	0.966545
ENSG00000279804|PRAMEF18	0	NA	NA	NA	NA	NA
ENSG00000116273|PHF13	11690	0.157391	0.0883895	1.78066	0.0749685	0.399483
ENSG00000162592|CCDC27	37.1558	-0.606325	0.670009	-0.904952	0.365491	0.741997
ENSG00000116254|CHD5	181.8	0.245987	0.309749	0.79415	0.427108	0.782177
ENSG00000049245|VAMP3	20951.7	0.0197579	0.0883937	0.223521	0.82313	0.954049
ENSG00000204624|DISP3	30.6735	0.148339	0.723422	0.205052	0.837531	0.958863
ENSG00000171603|CLSTN1	79521.4	-0.00400196	0.0821725	-0.0487019	0.961157	0.991264
ENSG00000142606|MMEL1	15.4773	0.244153	1.02206	0.238884	0.811195	0.949262
ENSG00000177674|AGTRAP	5830.26	-0.12779	0.124508	-1.02636	0.30472	0.698937
ENSG00000162572|SCNN1D	644.098	-0.148664	0.2273	-0.654042	0.513085	0.833094
ENSG00000171608|PIK3CD	4872.44	-0.182611	0.0986762	-1.85061	0.0642254	0.373384
ENSG00000171729|TMEM51	2604.94	0.170019	0.125926	1.35015	0.176969	0.565249
ENSG00000175262|C1orf127	36.8679	-0.275946	0.66014	-0.418011	0.675939	0.904853
ENSG00000162571|TTLL10	0	NA	NA	NA	NA	NA
ENSG00000158109|TPRG1L	9692.42	-0.143924	0.0926719	-1.55305	0.120411	0.486471
ENSG00000037637|FBXO42	3418.39	0.00582569	0.110038	0.0529425	0.957778	0.990391
ENSG00000184163|C1QTNF12	139.235	-0.228161	0.362707	-0.629051	0.529316	0.840385
ENSG00000159423|ALDH4A1	403.661	-0.18067	0.231365	-0.780887	0.434869	0.787885
ENSG00000142599|RERE	56249.8	-0.170466	0.0864776	-1.97122	0.048699	0.331166
ENSG00000011021|CLCN6	3924.23	-0.131055	0.10615	-1.23462	0.216972	0.614108
ENSG00000215912|TTC34	64.9527	0.266264	0.5537	0.480881	0.630601	0.886057
ENSG00000120952|PRAMEF2	0	NA	NA	NA	NA	NA
ENSG00000243073|PRAMEF4	0	NA	NA	NA	NA	NA
ENSG00000142615|CELA2A	0	NA	NA	NA	NA	NA
ENSG00000215704|CELA2B	3.35645	0.100244	2.97128	0.0337376	0.973086	NA
ENSG00000065526|SPEN	35472.6	0.126691	0.13747	0.921589	0.356743	0.73702
ENSG00000175756|AURKAIP1	18325.7	-0.23012	0.115193	-1.99768	0.0457509	0.320875
ENSG00000157916|RER1	36249	-0.0864379	0.100008	-0.864314	0.387415	0.75634
ENSG00000157881|PANK4	1803.91	0.031364	0.129292	0.242582	0.808329	0.949019
ENSG00000116213|WRAP73	7921.71	-0.126534	0.104192	-1.21443	0.224584	0.622094
ENSG00000127463|EMC1	9163	0.134928	0.103988	1.29753	0.194448	0.587109
ENSG00000048707|VPS13D	16137.5	0.0347646	0.165303	0.210309	0.833427	0.957384
ENSG00000158748|HTR6	53.2576	-0.381191	0.578658	-0.658751	0.510056	0.831375
ENSG00000130762|ARHGEF16	5575.86	0.00186902	0.104232	0.0179313	0.985694	0.996885
ENSG00000187144|SPATA21	3.8502	5.52473	2.63526	2.09646	0.0360413	NA
ENSG00000162444|RBP7	840.171	0.345235	0.199956	1.72655	0.0842482	0.419452
ENSG00000279169|PRAMEF13	0	NA	NA	NA	NA	NA
ENSG00000180758|GPR157	10988.6	-0.403449	0.095854	-4.20899	2.56514e-05	0.00217616
ENSG00000184677|ZBTB40	5501.41	0.0861675	0.106465	0.809349	0.418315	0.778514
ENSG00000270136|MICOS10-NBL1	0.665978	-2.72825	4.85828	-0.561568	0.574411	NA
ENSG00000132879|FBXO44	2716.4	-0.0126373	0.150319	-0.0840696	0.933001	0.982188
ENSG00000187545|PRAMEF10	0	NA	NA	NA	NA	NA
ENSG00000239810|PRAMEF11	0	NA	NA	NA	NA	NA
ENSG00000116731|PRDM2	18268.8	0.115197	0.134178	0.858534	0.390598	0.759086
ENSG00000116721|PRAMEF1	0	NA	NA	NA	NA	NA
ENSG00000131697|NPHP4	2957.52	-0.134698	0.129358	-1.04128	0.297745	0.693598
ENSG00000088280|ASAP3	1742.54	-0.122181	0.136811	-0.893062	0.371824	0.746735
ENSG00000188807|TMEM201	9796.36	-0.130435	0.0930209	-1.40221	0.160852	0.544803
ENSG00000198793|MTOR	39549.2	0.0578003	0.101004	0.572255	0.567149	0.860105
ENSG00000078900|TP73	589.949	0.461741	0.192463	2.39912	0.0164346	0.19506
ENSG00000142661|MYOM3	50.8375	-0.579615	0.569833	-1.01717	0.309074	0.70204
ENSG00000171819|ANGPTL7	17.0188	0.505126	0.94625	0.533818	0.593467	0.871876
ENSG00000197921|HES5	18.3523	-0.311659	0.940317	-0.331441	0.740311	0.926967
ENSG00000116288|PARK7	35762.1	-0.126439	0.0997091	-1.26808	0.20477	0.597831
ENSG00000142677|IL22RA1	553.724	0.217037	0.188487	1.15147	0.249539	0.645527
ENSG00000131910|NR0B2	0.697518	-2.79083	4.85518	-0.574816	0.565416	NA
ENSG00000185436|IFNLR1	831.864	0.155526	0.17432	0.892184	0.372294	0.746735
ENSG00000131914|LIN28A	8.67955	0.637954	1.3234	0.482055	0.629767	0.885839
ENSG00000232423|PRAMEF6	0	NA	NA	NA	NA	NA
ENSG00000169504|CLIC4	20673	0.241134	0.13111	1.83918	0.065889	0.377964
ENSG00000169641|LUZP1	8281.75	0.278359	0.13039	2.13482	0.0327754	0.272392
ENSG00000181773|GPR3	80.6025	0.487096	0.475293	1.02483	0.305442	0.698937
ENSG00000175707|KDF1	1520.35	-0.188193	0.136739	-1.3763	0.168729	0.555068
ENSG00000233954|UQCRHL	2527.96	-0.126973	0.121897	-1.04164	0.297577	0.693512
ENSG00000174950|CD164L2	18.2407	-0.314408	1.11187	-0.282775	0.777349	0.940678
ENSG00000055070|SZRD1	16719.9	-0.0392936	0.090227	-0.435497	0.663202	0.89962
ENSG00000175087|PDIK1L	1050.97	0.0688494	0.162629	0.423353	0.672038	0.903253
ENSG00000171735|CAMTA1	9676.29	0.0886371	0.0974273	0.909777	0.36294	0.740474
ENSG00000157191|NECAP2	4531.19	-0.105522	0.102986	-1.02462	0.305543	0.698937
ENSG00000133226|SRRM1	13491.4	-0.0144743	0.0901459	-0.160565	0.872436	0.968206
ENSG00000162482|AKR7A3	82.8664	0.446868	0.454381	0.983464	0.325379	0.712011
ENSG00000236782|ZNF593OS	74.6545	-0.0860308	0.466632	-0.184365	0.853727	0.962918
ENSG00000215910|C1orf167	5.13239	-0.955474	2.04575	-0.467053	0.640462	NA
ENSG00000116663|FBXO6	750.3	-0.0419006	0.194225	-0.215732	0.829197	0.956018
ENSG00000215695|RSC1A1	4.31064	0.464096	1.79645	0.25834	0.796144	NA
ENSG00000215906|LACTBL1	0	NA	NA	NA	NA	NA
ENSG00000188822|CNR2	6.64219	-0.811073	2.50728	-0.323487	0.746327	0.929734
ENSG00000090273|NUDC	12149.7	-0.129217	0.0985602	-1.31105	0.189841	0.581122
ENSG00000227868|TEX46	8.47052	-0.253414	1.62318	-0.156122	0.875937	0.969064
ENSG00000142751|GPN2	2915.75	-0.151076	0.116423	-1.29764	0.19441	0.587109
ENSG00000189266|PNRC2	10165	-0.0821021	0.102082	-0.804279	0.421236	0.779783
ENSG00000162511|LAPTM5	21.2186	0.439343	0.919249	0.477937	0.632695	0.886978
ENSG00000158014|SLC30A2	54.551	-0.0666435	0.571247	-0.116663	0.907127	0.976647
ENSG00000204138|PHACTR4	15862.1	-0.132066	0.0918226	-1.43827	0.150357	0.531331
ENSG00000142675|CNKSR1	2225.68	-0.086333	0.157955	-0.546565	0.584677	0.867512
ENSG00000197245|FAM110D	7.80842	2.52749	1.86277	1.35685	0.17483	0.562671
ENSG00000116237|ICMT	43159.7	0.0851409	0.0880567	0.966888	0.3336	0.717197
ENSG00000158195|WASF2	19991.8	-0.130479	0.0854736	-1.52654	0.126876	0.497721
ENSG00000130772|MED18	1242.1	-0.27693	0.141651	-1.95502	0.0505812	0.337074
ENSG00000204160|ZDHHC18	3581.9	-0.034626	0.106294	-0.325757	0.744608	0.928748
ENSG00000090020|SLC9A1	3831.08	0.046375	0.105894	0.437937	0.661432	0.89954
ENSG00000157978|LDLRAP1	1551.39	0.0333688	0.158863	0.210047	0.833631	0.957422
ENSG00000158246|TENT5B	797.69	0.0472993	0.170259	0.277808	0.781159	0.941486
ENSG00000130770|ATP5IF1	3136.63	-0.0795378	0.124282	-0.639979	0.522186	0.836437
ENSG00000117305|HMGCL	1814.75	-0.176864	0.135408	-1.30616	0.1915	0.583192
ENSG00000162512|SDC3	7363.26	0.144211	0.104403	1.3813	0.167188	0.552151
ENSG00000198746|GPATCH3	1240.21	-0.153385	0.142674	-1.07507	0.282343	0.677802
ENSG00000158006|PAFAH2	1819.13	-0.334744	0.134737	-2.48443	0.012976	0.171625
ENSG00000188529|SRSF10	16356.7	0.0612186	0.105398	0.580832	0.561353	0.857535
ENSG00000142784|WDTC1	3857.12	-0.0348352	0.108665	-0.320573	0.748534	0.930442
ENSG00000117682|DHDDS	2648.15	-0.115381	0.124689	-0.925351	0.354783	0.736049
ENSG00000175793|SFN	359.756	0.170525	0.223971	0.761371	0.446436	0.792838
ENSG00000126698|DNAJC8	12316.2	0.0228975	0.090169	0.25394	0.799542	0.94656
ENSG00000130766|SESN2	930.29	0.146122	0.164809	0.886614	0.375287	0.748464
ENSG00000168528|SERINC2	1772.3	-0.220294	0.147922	-1.48926	0.13642	0.511762
ENSG00000196581|AJAP1	0	NA	NA	NA	NA	NA
ENSG00000169403|PTAFR	810.188	0.166056	0.173719	0.955888	0.339129	0.722628
ENSG00000117676|RPS6KA1	2094.64	0.141532	0.126609	1.11787	0.263623	0.660966
ENSG00000198830|HMGN2	33767.1	-0.101864	0.0879994	-1.15756	0.247045	0.64386
ENSG00000084628|NKAIN1	68.8314	0.135837	0.496748	0.273452	0.784506	0.942755
ENSG00000060688|SNRNP40	6196.96	-0.0854268	0.0951143	-0.89815	0.369106	0.744246
ENSG00000171612|SLC25A33	11676.1	-0.104107	0.0921476	-1.12979	0.258565	0.656194
ENSG00000162458|FBLIM1	7120.23	0.0867796	0.0997374	0.870081	0.384256	0.753844
ENSG00000188910|GJB3	344.605	0.362883	0.256294	1.41589	0.156809	0.540956
ENSG00000116138|DNAJC16	8662.7	0.134449	0.115635	1.1627	0.244951	0.641844
ENSG00000142765|SYTL1	1198.39	-0.270333	0.1739	-1.55454	0.120056	0.485803
ENSG00000158161|EYA3	4703.01	0.0735863	0.0990577	0.742863	0.457565	0.799687
ENSG00000142684|ZNF593	1207.43	-0.26165	0.156606	-1.67075	0.0947701	0.439435
ENSG00000060642|PIGV	1223.4	-0.107688	0.146589	-0.734627	0.462567	0.801903
ENSG00000121769|FABP3	70.9077	0.812025	0.487285	1.66643	0.0956282	0.440423
ENSG00000157330|C1orf158	0	NA	NA	NA	NA	NA
ENSG00000162413|KLHL21	4418.43	0.325224	0.100697	3.22972	0.00123911	0.0401373
ENSG00000142627|EPHA2	37138.7	-0.0794491	0.0835115	-0.951356	0.341424	0.724701
ENSG00000142632|ARHGEF19	5800.75	0.184697	0.106892	1.72787	0.0840108	0.419441
ENSG00000162490|DRAXIN	145.688	0.613007	0.355067	1.72646	0.0842655	0.419452
ENSG00000158292|GPR153	1141.12	0.081955	0.145367	0.563778	0.572905	0.862774
ENSG00000142733|MAP3K6	1238.52	0.285367	0.139634	2.04368	0.0409849	0.306793
ENSG00000189337|KAZN	11375.9	-0.0253588	0.0886311	-0.286116	0.774789	0.939567
ENSG00000270601|PRAMEF5	0	NA	NA	NA	NA	NA
ENSG00000028137|TNFRSF1B	180.477	0.840247	0.311083	2.70104	0.00691239	0.121395
ENSG00000162460|TMEM82	0	NA	NA	NA	NA	NA
ENSG00000142687|KIAA0319L	15631.9	-0.154448	0.0865605	-1.78428	0.0743775	0.39832
ENSG00000130939|UBE4B	30731.6	0.0354715	0.0983673	0.360602	0.718397	0.919516
ENSG00000127472|PLA2G5	0	NA	NA	NA	NA	NA
ENSG00000060656|PTPRU	1109.23	-0.0083588	0.151861	-0.0550426	0.956105	0.990146
ENSG00000163867|ZMYM6	4124.84	0.0581092	0.110031	0.528116	0.597419	0.872724
ENSG00000189280|GJB5	22.5814	0.606375	1.02858	0.589528	0.555507	0.853846
ENSG00000134698|AGO4	2650.21	0.14533	0.143954	1.00956	0.312708	0.704168
ENSG00000134690|CDCA8	6553.15	-0.280821	0.0960434	-2.9239	0.00345679	0.0786188
ENSG00000132881|CPLANE2	540.315	-0.307133	0.199009	-1.54331	0.122756	0.489739
ENSG00000273274|ZBTB8B	827.213	0.527659	0.168288	3.13545	0.0017159	0.0497517
ENSG00000116251|RPL22	116308	-0.0717315	0.084952	-0.844377	0.398459	0.765236
ENSG00000158286|RNF207	1145.87	0.597896	0.181812	3.28853	0.00100711	0.0346525
ENSG00000009709|PAX7	1.10996	-3.46438	4.82903	-0.717407	0.473123	NA
ENSG00000043514|TRIT1	3389.69	-0.0217196	0.114751	-0.189276	0.849876	0.962025
ENSG00000162510|MATN1	10.5146	-0.132236	1.42438	-0.0928378	0.926032	0.981149
ENSG00000179002|TAS1R2	0	NA	NA	NA	NA	NA
ENSG00000188984|AADACL3	0	NA	NA	NA	NA	NA
ENSG00000158008|EXTL1	41.5307	-0.186185	0.638542	-0.291578	0.770609	0.937956
ENSG00000130940|CASZ1	1101.59	-0.135186	0.148445	-0.910678	0.362465	0.740238
ENSG00000116771|AGMAT	2376.64	0.187761	0.121422	1.54635	0.12202	0.488753
ENSG00000162585|FAAP20	11424.1	-0.15064	0.111096	-1.35594	0.175119	0.562921
ENSG00000163879|DNALI1	190.094	-0.322977	0.320025	-1.00923	0.312866	0.704168
ENSG00000127129|EDN2	725.642	-0.713341	0.195624	-3.6465	0.000265841	0.0137945
ENSG00000010803|SCMH1	3659.38	-0.0110292	0.114014	-0.0967355	0.922936	0.980024
ENSG00000169991|IFFO2	63.0437	0.120295	0.518214	0.232133	0.816434	0.951014
ENSG00000116954|RRAGC	4954.06	0.0436203	0.100271	0.435026	0.663544	0.89962
ENSG00000117013|KCNQ4	118.976	0.702869	0.393233	1.78741	0.0738714	0.39729
ENSG00000163873|GRIK3	0.493974	2.57767	4.90302	0.525732	0.599075	NA
ENSG00000117215|PLA2G2D	0	NA	NA	NA	NA	NA
ENSG00000196449|YRDC	3169.2	-0.216343	0.12626	-1.71347	0.0866254	0.423461
ENSG00000237700|PRAMEF33	0	NA	NA	NA	NA	NA
ENSG00000253368|TRNP1	429.857	-0.151168	0.241441	-0.626107	0.531245	0.842119
ENSG00000179862|CITED4	312.351	-0.582542	0.27215	-2.14052	0.0323128	0.270537
ENSG00000116661|FBXO2	1764.55	-0.294692	0.14326	-2.05704	0.0396828	0.301961
ENSG00000162461|SLC25A34	341.576	-0.0772792	0.26507	-0.291543	0.770636	0.937956
ENSG00000044012|GUCA2B	12.2743	-0.665884	1.13291	-0.587762	0.556692	0.854817
ENSG00000179051|RCC2	15707	-0.0285213	0.0897025	-0.317954	0.75052	0.931339
ENSG00000053372|MRTO4	5995.02	-0.11484	0.103415	-1.11047	0.266797	0.664671
ENSG00000126067|PSMB2	19205.8	-0.0177954	0.0889561	-0.200046	0.841444	0.959789
ENSG00000274944	70.0125	0.504028	0.50944	0.989376	0.322479	0.709717
ENSG00000066136|NFYC	6121.31	-0.216737	0.0957182	-2.26432	0.0235544	0.23195
ENSG00000132906|CASP9	2957.05	-0.0672966	0.117924	-0.570678	0.568218	0.860784
ENSG00000197312|DDI2	30500.4	0.237104	0.150516	1.57528	0.115192	0.474928
ENSG00000173660|UQCRH	17144.6	-0.157562	0.103107	-1.52815	0.126476	0.497069
ENSG00000092847|AGO1	11308	0.128685	0.10675	1.20547	0.22802	0.625006
ENSG00000204510|PRAMEF7	0	NA	NA	NA	NA	NA
ENSG00000054118|THRAP3	27824.6	0.0473573	0.0960466	0.493066	0.621966	0.881984
ENSG00000254553	13.2571	4.17775	1.77826	2.34935	0.0188061	0.209546
ENSG00000177181|RIMKLA	41.6846	-0.439309	0.658238	-0.667402	0.504515	0.829309
ENSG00000276747|PADI6	0	NA	NA	NA	NA	NA
ENSG00000159339|PADI4	0	NA	NA	NA	NA	NA
ENSG00000162373|BEND5	54.3687	0.184747	0.539731	0.342294	0.732129	0.924567
ENSG00000197982|C1orf122	4329	-0.249198	0.114031	-2.18536	0.0288622	0.256873
ENSG00000183317|EPHA10	47.2938	-0.094831	0.602597	-0.157371	0.874953	0.968719
ENSG00000183386|FHL3	1750.85	0.129157	0.152806	0.845236	0.397979	0.764673
ENSG00000158315|RHBDL2	278.729	0.508194	0.272714	1.86347	0.0623967	0.370488
ENSG00000243749|TMEM35B	1269.87	-0.0421739	0.175443	-0.240385	0.810032	0.949262
ENSG00000204084|INPP5B	4058.76	0.0367643	0.105675	0.347898	0.727917	0.923398
ENSG00000186973|FAM183A	12.5553	-3.14513	1.4496	-2.16966	0.0300327	0.261851
ENSG00000142698|C1orf94	0	NA	NA	NA	NA	NA
ENSG00000146463|ZMYM4	17973.9	0.185677	0.141221	1.31481	0.188575	0.579737
ENSG00000183520|UTP11	7162.96	0.0324746	0.103822	0.312791	0.75444	0.932631
ENSG00000090686|USP48	11150	-0.0663096	0.100504	-0.659771	0.509401	0.831002
ENSG00000085998|POMGNT1	10183.6	-0.0132665	0.0983191	-0.134933	0.892665	0.972549
ENSG00000271741	428.169	-0.30324	0.291117	-1.04164	0.297578	0.693512
ENSG00000142686|C1orf216	2192.66	0.137415	0.123265	1.11479	0.264939	0.662617
ENSG00000117148|ACTL8	7.35227	0.334185	1.91831	0.174208	0.861702	0.964504
ENSG00000127125|PPCS	4362.32	-0.122453	0.104722	-1.16932	0.242275	0.638082
ENSG00000197429|IPP	1823.75	0.308624	0.137927	2.23758	0.0252482	0.240112
ENSG00000117000|RLF	5343.85	0.116697	0.130665	0.8931	0.371804	0.746735
ENSG00000284989	0	NA	NA	NA	NA	NA
ENSG00000178585|CTNNBIP1	4653.97	-0.133205	0.110343	-1.2072	0.227355	0.624388
ENSG00000092853|CLSPN	8666.45	0.550081	0.112893	4.8726	1.1014e-06	0.000177704
ENSG00000198754|OXCT2	44.2302	0.560871	0.729869	0.768454	0.442217	0.790298
ENSG00000134697|GNL2	15428.9	0.036066	0.0907023	0.39763	0.690903	0.911074
ENSG00000187513|GJA4	2.76917	-1.04898	3.1813	-0.329734	0.741601	NA
ENSG00000278139|P3R3URF-PIK3R3	0	NA	NA	NA	NA	NA
ENSG00000116151|MORN1	2426.46	-0.140446	0.116347	-1.20712	0.227384	0.624388
ENSG00000006555|TTC22	14.4564	-0.159936	1.13726	-0.140632	0.88816	0.971985
ENSG00000066056|TIE1	3.03587	-0.058743	3.05679	-0.0192172	0.984668	NA
ENSG00000214114|MYCBP	5030.75	0.0144451	0.104032	0.138853	0.889566	0.971985
ENSG00000173436|MICOS10	4967.58	-0.219628	0.127924	-1.71686	0.0860042	0.422615
ENSG00000116544|DLGAP3	457.636	0.230102	0.211227	1.08936	0.275997	0.673408
ENSG00000204060|FOXO6	517.033	-0.400776	0.219408	-1.82663	0.0677559	0.382766
ENSG00000186094|AGBL4	3.03587	-0.058743	3.05679	-0.0192172	0.984668	NA
ENSG00000117016|RIMS3	817.478	0.336797	0.188444	1.78725	0.0738978	0.39729
ENSG00000121310|ECHDC2	5756.41	-0.108953	0.128526	-0.847715	0.396597	0.763664
ENSG00000169213|RAB3B	1161.23	0.978393	0.164551	5.94583	2.75058e-09	1.02565e-06
ENSG00000163866|SMIM12	7881.28	-0.0151231	0.0957325	-0.157973	0.874478	0.968719
ENSG00000049249|TNFRSF9	32.765	0.970639	0.726655	1.33576	0.181627	0.57049
ENSG00000171793|CTPS1	11310.6	0.25751	0.0908743	2.83369	0.0046014	0.0930676
ENSG00000116990|MYCL	2940.23	-0.25734	0.144959	-1.77526	0.0758554	0.400979
ENSG00000143001|TMEM61	33.076	-2.16247	0.798885	-2.70686	0.00679221	0.120119
ENSG00000274386|TMEM269	65.8836	-0.560525	0.503002	-1.11436	0.265125	0.662772
ENSG00000285839	171.543	4.15601	0.456247	9.10912	8.30512e-20	3.32911e-16
ENSG00000117419|ERI3	8134.69	-0.173051	0.11447	-1.51176	0.130596	0.503117
ENSG00000162384|CZIB	3585.48	-0.0923024	0.118773	-0.777135	0.437079	0.788399
ENSG00000162391|FAM151A	44.8715	0.0992245	0.639405	0.155182	0.876677	0.969064
ENSG00000174348|PODN	78.318	0.473514	0.482447	0.981483	0.326355	0.712098
ENSG00000117859|OSBPL9	10459.8	0.0723903	0.0975576	0.742026	0.458072	0.799904
ENSG00000253313|C1orf210	1244.75	-0.140129	0.149415	-0.937846	0.348323	0.730281
ENSG00000040487|SLC66A1	995.23	-0.00879502	0.17063	-0.0515444	0.958892	0.990834
ENSG00000162396|PARS2	1417.47	-0.23733	0.155567	-1.52558	0.127115	0.497721
ENSG00000203995|ZYG11A	4046.52	0.144995	0.123759	1.17159	0.241362	0.637142
ENSG00000117713|ARID1A	25392.7	-0.0302589	0.115824	-0.261249	0.793901	0.945827
ENSG00000177868|SVBP	603.433	-0.143653	0.201739	-0.712073	0.47642	0.812977
ENSG00000284686	8.98108	-0.352781	1.37997	-0.255644	0.798226	0.94656
ENSG00000162378|ZYG11B	7174.89	0.32822	0.162329	2.02194	0.0431824	0.313657
ENSG00000162599|NFIA	3641.85	-0.114394	0.107769	-1.06147	0.288475	0.683933
ENSG00000240563|L1TD1	6.11493	-1.15368	2.11105	-0.546496	0.584725	0.867512
ENSG00000284773	216.083	-0.101616	0.306384	-0.331664	0.740143	0.926967
ENSG00000117862|TXNDC12	9628.65	-0.0931153	0.0978559	-0.951556	0.341322	0.724677
ENSG00000162551|ALPL	902.267	-0.359836	0.177842	-2.02335	0.0430376	0.313657
ENSG00000183431|SF3A3	14035.3	-0.0539103	0.0874258	-0.616641	0.537472	0.844967
ENSG00000169174|PCSK9	2.42433	4.85293	3.87731	1.25163	0.210706	NA
ENSG00000243725|TTC4	3822.43	-0.110048	0.1079	-1.01991	0.307769	0.701182
ENSG00000116985|BMP8B	292.779	-0.000346574	0.248333	-0.0013956	0.998886	0.999865
ENSG00000134716|CYP2J2	1200.58	0.116454	0.15393	0.756542	0.449324	0.794931
ENSG00000171872|KLF17	0.930024	-3.20634	4.83765	-0.66279	0.507465	NA
ENSG00000162407|PLPP3	2197.96	-0.114624	0.133936	-0.855815	0.3921	0.759658
ENSG00000169218|RSPO1	10.4638	-0.101552	1.26238	-0.0804449	0.935883	0.982773
ENSG00000163877|SNIP1	3245.9	0.102017	0.114427	0.891549	0.372635	0.746947
ENSG00000157184|CPT2	6815.5	-0.0761004	0.0988492	-0.769864	0.44138	0.790122
ENSG00000198815|FOXJ3	10880.4	0.107037	0.12503	0.85609	0.391948	0.759601
ENSG00000134744|TUT4	9246.21	0.26648	0.13185	2.02108	0.0432711	0.313657
ENSG00000162437|RAVER2	4496.43	0.359381	0.114028	3.15168	0.00162332	0.0476499
ENSG00000283039|KLF18	0	NA	NA	NA	NA	NA
ENSG00000184292|TACSTD2	5772.41	0.197912	0.119839	1.65148	0.0986398	0.445895
ENSG00000187140|FOXD3	220.728	-0.642524	0.31699	-2.02695	0.0426673	0.313185
ENSG00000186409|CCDC30	409.496	-0.579152	0.217001	-2.66889	0.00761016	0.126671
ENSG00000162595|DIRAS3	175.941	-0.131782	0.331939	-0.397006	0.691363	0.91121
ENSG00000171357|LURAP1	1.21601	-0.28206	3.59741	-0.0784062	0.937505	NA
ENSG00000162385|MAGOH	5532.76	-0.000700903	0.105501	-0.00664358	0.994699	0.999483
ENSG00000086015|MAST2	8025.61	0.0191446	0.0951302	0.201246	0.840506	0.959773
ENSG00000184588|PDE4B	712.956	-0.078255	0.193014	-0.405436	0.685157	0.909172
ENSG00000117472|TSPAN1	305.353	-0.246315	0.248649	-0.990614	0.321874	0.709309
ENSG00000123080|CDKN2C	364.986	-0.881452	0.227331	-3.87739	0.000105582	0.0068262
ENSG00000077549|CAPZB	16802.5	-0.107819	0.0977406	-1.10311	0.269978	0.667515
ENSG00000162598|C1orf87	22.1593	0.539616	0.984547	0.548086	0.583633	0.867382
ENSG00000162415|ZSWIM5	479.664	-0.0277843	0.20499	-0.13554	0.892185	0.972549
ENSG00000185483|ROR1	3428.6	-0.132554	0.127395	-1.0405	0.298108	0.69361
ENSG00000162600|OMA1	2059.81	-0.19632	0.122199	-1.60656	0.108152	0.464907
ENSG00000116704|SLC35D1	2520.9	0.239347	0.13148	1.82041	0.0686961	0.385535
ENSG00000157193|LRP8	2838.36	0.215824	0.126145	1.71093	0.0870943	0.424976
ENSG00000116205|TCEANC2	3912.66	0.0837396	0.124973	0.670059	0.50282	0.828347
ENSG00000198841|KTI12	1548.97	-0.219406	0.132267	-1.65881	0.0971535	0.442294
ENSG00000116212|LRRC42	4921.55	0.00781896	0.102737	0.0761062	0.939335	0.984174
ENSG00000116729|WLS	35110.9	-0.181391	0.0893804	-2.02943	0.0424144	0.312103
ENSG00000132854|KANK4	733.597	0.16285	0.182326	0.893182	0.371759	0.746735
ENSG00000162616|DNAJB4	1761.95	0.435345	0.135871	3.20411	0.00135481	0.0420488
ENSG00000162607|USP1	14965.7	0.472543	0.129938	3.63667	0.000276187	0.0141522
ENSG00000154027|AK5	276.612	0.253941	0.255071	0.995568	0.31946	0.708468
ENSG00000132122|SPATA6	1015.71	0.121471	0.159008	0.76393	0.444909	0.791487
ENSG00000137960|GIPC2	1.67099	-0.309604	3.7309	-0.0829838	0.933864	NA
ENSG00000116745|RPE65	4.57691	0.557212	2.72374	0.204576	0.837903	NA
ENSG00000132855|ANGPTL3	9.10299	0.585565	1.36149	0.430092	0.667129	0.901387
ENSG00000172380|GNG12	18239.1	0.150313	0.113251	1.32725	0.184426	0.575236
ENSG00000116675|DNAJC6	4152.51	0.361595	0.143397	2.52164	0.011681	0.161319
ENSG00000162433|AK4	10333.6	0.10124	0.122049	0.829499	0.406822	0.772455
ENSG00000213625|LEPROT	6933.04	0.0840416	0.0965363	0.87057	0.383989	0.753844
ENSG00000085999|RAD54L	2792.31	0.383905	0.111591	3.44029	0.000581092	0.023708
ENSG00000158966|CACHD1	7714.07	-0.127622	0.135178	-0.944103	0.345117	0.727532
ENSG00000203965|EFCAB7	892.561	0.165745	0.178727	0.927367	0.353736	0.735738
ENSG00000153898|MCOLN2	174.806	0.426002	0.351034	1.21356	0.224914	0.622094
ENSG00000117069|ST6GALNAC5	739.215	0.16839	0.177255	0.949987	0.342119	0.7256
ENSG00000187048|CYP4A11	0.697518	-2.79083	4.85518	-0.574816	0.565416	NA
ENSG00000125703|ATG4C	1941.71	0.202542	0.132734	1.52592	0.127029	0.497721
ENSG00000154007|ASB17	0	NA	NA	NA	NA	NA
ENSG00000162618|ADGRL4	0	NA	NA	NA	NA	NA
ENSG00000131233|GJA9	19.8523	-0.783547	0.914583	-0.856726	0.391596	0.759601
ENSG00000153936|HS2ST1	10896.9	0.137957	0.140758	0.980101	0.327036	0.712556
ENSG00000174021|GNG5	11711.6	-0.114027	0.110256	-1.0342	0.301041	0.696366
ENSG00000084072|PPIE	6855.14	-0.0687713	0.122437	-0.561689	0.574328	0.863793
ENSG00000180488|MIGA1	3095.55	0.235386	0.150797	1.56095	0.118535	0.482653
ENSG00000016490|CLCA1	0.665978	-2.72825	4.85828	-0.561568	0.574411	NA
ENSG00000188786|MTF1	5467.06	0.0679871	0.109565	0.620517	0.534917	0.843314
ENSG00000117151|CTBS	905.665	-0.0245911	0.18264	-0.134642	0.892895	0.972553
ENSG00000162434|JAK1	32095.1	0.0251749	0.116245	0.216568	0.828545	0.955614
ENSG00000137941|TTLL7	1364.62	0.613736	0.156915	3.91126	9.18165e-05	0.00626817
ENSG00000116717|GADD45A	3447.13	0.177593	0.108324	1.63946	0.101117	0.451999
ENSG00000137968|SLC44A5	1570.69	0.140426	0.172856	0.812387	0.41657	0.776859
ENSG00000066135|KDM4A	8668.75	0.0956749	0.100318	0.953715	0.340228	0.723543
ENSG00000284895	0.772021	1.28312	4.28221	0.29964	0.764451	NA
ENSG00000117174|ZNHIT6	6961.75	-0.00925355	0.0953564	-0.0970417	0.922693	0.980024
ENSG00000184313|MROH7	50.5432	0.0718241	0.62482	0.114952	0.908483	0.976955
ENSG00000122420|PTGFR	4.76597	-0.484827	2.69887	-0.17964	0.857435	NA
ENSG00000267561	7.50464	0.458083	1.40065	0.327051	0.74363	0.928321
ENSG00000143013|LMO4	13260.8	-0.0977296	0.0928168	-1.05293	0.292373	0.688491
ENSG00000134748|PRPF38A	10838.5	0.0602947	0.0919214	0.655938	0.511864	0.832545
ENSG00000097096|SYDE2	1548.87	0.430144	0.239771	1.79398	0.0728165	0.394572
ENSG00000142892|PIGK	6666.05	0.229976	0.126178	1.82264	0.0683582	0.384581
ENSG00000184005|ST6GALNAC3	463.598	0.291452	0.220352	1.32266	0.185947	0.576842
ENSG00000197273|GUCA2A	0	NA	NA	NA	NA	NA
ENSG00000058804|NDC1	17369.4	0.164729	0.108366	1.52011	0.128483	0.499716
ENSG00000162402|USP24	15206	0.209266	0.163827	1.27736	0.201474	0.594453
ENSG00000116641|DOCK7	5988.47	0.242351	0.149664	1.6193	0.105383	0.460162
ENSG00000172260|NEGR1	220.084	0.284555	0.308024	0.923808	0.355586	0.736049
ENSG00000185104|FAF1	7518.53	-0.16467	0.095497	-1.72435	0.084645	0.420008
ENSG00000117480|FAAH	673.155	-0.203661	0.183449	-1.11018	0.266923	0.664882
ENSG00000137944|KYAT3	7786.97	-0.0490798	0.0921676	-0.532506	0.594375	0.87216
ENSG00000182183|SHISAL2A	2.46987	4.89036	3.82965	1.27697	0.201611	NA
ENSG00000271949	0	NA	NA	NA	NA	NA
ENSG00000067334|DNTTIP2	13822.4	0.11509	0.101934	1.12907	0.25887	0.656656
ENSG00000122417|ODF2L	4356.97	0.150238	0.140818	1.0669	0.286018	0.680775
ENSG00000142949|PTPRF	34569.2	-0.10053	0.0933449	-1.07698	0.281491	0.676878
ENSG00000116133|DHCR24	121341	-0.0120725	0.0823233	-0.146647	0.883411	0.971376
ENSG00000171502|COL24A1	113.243	0.372066	0.38514	0.966053	0.334017	0.717337
ENSG00000162399|BSND	44.7775	0.558075	0.607108	0.919235	0.357973	0.737337
ENSG00000116157|GPX7	9.47086	0.661439	1.29453	0.510948	0.609388	0.877102
ENSG00000143036|SLC44A3	488.93	0.222708	0.198004	1.12477	0.260688	0.657759
ENSG00000065243|PKN2	8863.03	0.319089	0.139571	2.28622	0.0222415	0.225995
ENSG00000117500|TMED5	8117.74	0.303133	0.123998	2.44466	0.014499	0.182765
ENSG00000016602|CLCA4	4.47296	-0.990122	2.20782	-0.44846	0.653821	NA
ENSG00000171790|SLFNL1	82.9578	0.656633	0.483882	1.35701	0.174777	0.562671
ENSG00000117528|ABCD3	8228.57	0.187324	0.115499	1.62186	0.104833	0.459262
ENSG00000271723|MROH7-TTC4	19.6483	0.409667	4.57381	0.0895681	0.92863	0.981386
ENSG00000066185|ZMYND12	21.5562	0.38881	0.884833	0.439416	0.66036	0.899211
ENSG00000172339|ALG14	620.882	-0.197977	0.179434	-1.10334	0.269879	0.667515
ENSG00000036549|ZZZ3	10138.6	0.0847142	0.136016	0.622823	0.533401	0.842706
ENSG00000058799|YIPF1	2651.31	-0.0594408	0.112177	-0.529886	0.596191	0.872557
ENSG00000203985|LDLRAD1	54.4731	-0.0359616	0.568988	-0.0632028	0.949605	0.988005
ENSG00000283761	1783.19	-0.889112	1.01446	-0.876442	0.38079	0.751364
ENSG00000189433|GJB4	3.35436	1.37787	2.9914	0.46061	0.645079	NA
ENSG00000179178|TMEM125	1626.86	-0.203766	0.151623	-1.3439	0.17898	0.568065
ENSG00000142700|DMRTA2	4.73979	0.744321	2.69174	0.27652	0.782148	NA
ENSG00000127124|HIVEP3	175.202	0.236199	0.346084	0.68249	0.494929	0.824811
ENSG00000097033|SH3GLB1	7350.66	0.0985525	0.106708	0.923576	0.355707	0.736049
ENSG00000182330|PRAMEF8	0	NA	NA	NA	NA	NA
ENSG00000162604|TM2D1	2410.46	0.0692893	0.147295	0.470411	0.638062	0.889625
ENSG00000116171|SCP2	12035	0.0478489	0.089419	0.535109	0.592575	0.871597
ENSG00000134709|HOOK1	6419.02	0.287032	0.137233	2.09157	0.0364771	0.289829
ENSG00000137936|BCAR3	1556.54	-0.0567839	0.133176	-0.426382	0.66983	0.902917
ENSG00000143032|BARHL2	54.2325	-0.15057	0.564904	-0.26654	0.789823	0.944534
ENSG00000178028|DMAP1	4010.34	-0.100482	0.113153	-0.888022	0.374529	0.747845
ENSG00000168710|AHCYL1	18524.4	-0.030138	0.0951861	-0.316622	0.75153	0.931581
ENSG00000117519|CNN3	30937.4	0.0704438	0.0955071	0.737576	0.460772	0.801271
ENSG00000134215|VAV3	19624.1	-0.433782	0.0987898	-4.39096	1.12853e-05	0.00111011
ENSG00000188641|DPYD	107.36	-0.180007	0.416035	-0.432673	0.665252	0.900353
ENSG00000152078|TLCD4	1323.01	0.650912	0.164858	3.94831	7.8705e-05	0.00551073
ENSG00000185668|POU3F1	2.3476	1.24659	2.73946	0.45505	0.649074	NA
ENSG00000171492|LRRC8D	10951.8	-0.0905121	0.0966448	-0.936544	0.348993	0.730994
ENSG00000170989|S1PR1	708.151	0.525834	0.182502	2.88125	0.00396106	0.0853651
ENSG00000186086|NBPF6	0.909125	3.43471	4.85042	0.708126	0.478867	NA
ENSG00000055732|MCOLN3	2451.35	0.528332	0.114232	4.62508	3.7446e-06	0.000457192
ENSG00000116299|ELAPOR1	145.586	0.269121	0.359317	0.748981	0.453868	0.797952
ENSG00000137962|ARHGAP29	70308.6	0.195884	0.153415	1.27683	0.201662	0.594453
ENSG00000198691|ABCA4	729.03	-0.133386	0.18087	-0.737467	0.460838	0.801271
ENSG00000079739|PGM1	6784.33	0.0511915	0.10994	0.46563	0.64148	0.891291
ENSG00000117154|IGSF21	0	NA	NA	NA	NA	NA
ENSG00000162377|COA7	6154.77	-0.0153324	0.0965301	-0.158835	0.873799	0.968719
ENSG00000116670|MAD2L2	5768.75	-0.117574	0.111039	-1.05885	0.289669	0.684824
ENSG00000116774|OLFML3	102.488	0.173893	0.415797	0.418216	0.67579	0.904853
ENSG00000269113|TRABD2B	2.52603	-4.64869	3.09762	-1.50073	0.133425	NA
ENSG00000023909|GCLM	3817.8	-0.334008	0.12002	-2.78293	0.0053871	0.102415
ENSG00000117133|RPF1	7244.4	-0.00309609	0.0931797	-0.033227	0.973494	0.994004
ENSG00000069702|TGFBR3	1643.05	0.0837414	0.194706	0.430091	0.667129	0.901387
ENSG00000117461|PIK3R3	12319.6	0.0731311	0.112678	0.649027	0.516321	0.833712
ENSG00000198198|SZT2	7111.73	-0.10428	0.115086	-0.906106	0.36488	0.741502
ENSG00000116793|PHTF1	4174.29	0.242482	0.122073	1.98637	0.0469919	0.324671
ENSG00000134201|GSTM5	7.13172	-0.906556	2.44278	-0.371117	0.71055	0.918164
ENSG00000116455|WDR77	7165.38	-0.138344	0.0951477	-1.454	0.145947	0.525105
ENSG00000213366|GSTM2	2502.61	-0.275157	0.128227	-2.14587	0.0318834	0.269842
ENSG00000117525|F3	649.021	0.461707	0.180633	2.55604	0.010587	0.153622
ENSG00000099260|PALMD	1967.41	-0.133399	0.130167	-1.02483	0.305444	0.698937
ENSG00000282608|ADORA3	1.32205	2.28268	3.48241	0.655488	0.512154	NA
ENSG00000134258|VTCN1	7048.7	-0.646864	0.100159	-6.45836	1.05845e-10	6.28564e-08
ENSG00000162692|VCAM1	0.493974	2.57767	4.90302	0.525732	0.599075	NA
ENSG00000163349|HIPK1	8783.61	0.241369	0.158632	1.52156	0.128119	0.499578
ENSG00000134222|PSRC1	3869.53	-0.653483	0.109589	-5.96305	2.47573e-09	9.4514e-07
ENSG00000181656|GPR88	0	NA	NA	NA	NA	NA
ENSG00000122481|RWDD3	1210.25	-0.0255716	0.139742	-0.182991	0.854805	0.963172
ENSG00000198162|MAN1A2	25157.2	0.1887	0.123107	1.53282	0.125321	0.494682
ENSG00000196369|SRGAP2B	3361.16	-0.0102646	0.145834	-0.0703853	0.943887	0.985739
ENSG00000171517|LPAR3	8373.78	-0.632888	0.0987552	-6.40865	1.46813e-10	7.59357e-08
ENSG00000117543|DPH5	3010.19	-0.12603	0.111281	-1.13255	0.257405	0.654803
ENSG00000143079|CTTNBP2NL	4580.16	0.0515058	0.145095	0.35498	0.722605	0.921078
ENSG00000134243|SORT1	29250.8	0.00592746	0.10629	0.055767	0.955527	0.990108
ENSG00000134250|NOTCH2	64673.1	0.128121	0.149284	0.858239	0.390761	0.759086
ENSG00000162643|DNAI3	126.677	-0.259164	0.383971	-0.674958	0.499703	0.826915
ENSG00000143093|STRIP1	4386.59	-0.00551873	0.100563	-0.0548784	0.956235	0.990146
ENSG00000188761|BCL2L15	36.3244	0.204576	0.790415	0.25882	0.795774	0.94656
ENSG00000085491|SLC25A24	3459.22	0.244339	0.139468	1.75194	0.0797842	0.409363
ENSG00000117598|PLPPR5	4.64496	-1.8537	2.10248	-0.881672	0.377954	NA
ENSG00000221986|MYBPHL	1.62754	-4.01418	4.47429	-0.897166	0.369631	NA
ENSG00000173947|PIFO	32.6595	-0.795279	0.704603	-1.12869	0.259028	0.656759
ENSG00000134198|TSPAN2	1146.4	0.340046	0.155459	2.18737	0.0287154	0.256081
ENSG00000215784|FAM72D	1985.38	-0.487001	0.128742	-3.78278	0.000155087	0.00927861
ENSG00000155363|MOV10	7535.54	-0.00437088	0.0940595	-0.0464693	0.962936	0.991824
ENSG00000198799|LRIG2	2516.98	0.137045	0.115214	1.18948	0.23425	0.631629
ENSG00000143106|PSMA5	10209.3	-0.120459	0.107964	-1.11573	0.264538	0.662233
ENSG00000117620|SLC35A3	6728.68	0.288857	0.107466	2.68789	0.00719059	0.123304
ENSG00000162688|AGL	8265.82	0.406791	0.181507	2.24119	0.0250139	0.239161
ENSG00000197106|SLC6A17	11.6096	-0.61075	1.14291	-0.534382	0.593078	0.871623
ENSG00000271601|LIX1L	964.167	0.354849	0.158722	2.23566	0.0253741	0.240454
ENSG00000203859|HSD3B2	0	NA	NA	NA	NA	NA
ENSG00000134242|PTPN22	7.23971	6.43211	2.24813	2.86109	0.00422181	0.088487
ENSG00000060718|COL11A1	103.114	0.0161716	0.401649	0.040263	0.967883	0.993087
ENSG00000185946|RNPC3	2251.71	-0.0522412	0.123582	-0.422724	0.672497	0.903354
ENSG00000162627|SNX7	1588.44	0.242217	0.133526	1.81401	0.0696766	0.387429
ENSG00000134262|AP4B1	1516.48	-0.0609143	0.131467	-0.463343	0.643119	0.892716
ENSG00000186141|POLR3C	7437.64	0.00561254	0.0964671	0.0581808	0.953605	0.989673
ENSG00000031698|SARS1	15636.8	-0.102624	0.0902849	-1.13667	0.255675	0.652233
ENSG00000162695|SLC30A7	9710.15	0.182911	0.102543	1.78375	0.0744636	0.398648
ENSG00000134184|GSTM1	519.813	-0.337101	0.210825	-1.59896	0.109829	0.467374
ENSG00000265808|SEC22B	15162.7	0.176097	0.102076	1.72516	0.084499	0.41972
ENSG00000162601|MYSM1	5790.04	0.29359	0.158435	1.85307	0.0638725	0.372896
ENSG00000271810	15.4529	-0.660656	1.09026	-0.60596	0.544541	0.848384
ENSG00000272031|ANKRD34A	134.173	0.701446	0.354153	1.98063	0.0476327	0.327189
ENSG00000174332|GLIS1	23.433	1.14078	0.86931	1.31228	0.189427	0.580847
ENSG00000134247|PTGFRN	22849.2	0.0375936	0.111362	0.33758	0.73568	0.925422
ENSG00000116752|BCAS2	6410.73	0.144459	0.0944712	1.52913	0.126232	0.496687
ENSG00000162664|ZNF326	7901.9	0.185177	0.138016	1.3417	0.179692	0.568904
ENSG00000134253|TRIM45	2189.7	0.0954003	0.128065	0.744938	0.456309	0.798828
ENSG00000173218|VANGL1	9846.32	0.00629304	0.110285	0.0570618	0.954496	0.989678
ENSG00000168509|HJV	2.92796	-4.86309	2.91931	-1.66583	0.0957464	NA
ENSG00000121933|TMIGD3	1.10996	-3.46438	4.82903	-0.717407	0.473123	NA
ENSG00000183508|TENT5C	2169.74	0.0510717	0.123388	0.41391	0.67894	0.905898
ENSG00000174827|PDZK1	311.438	0.224935	0.260698	0.862818	0.388237	0.757207
ENSG00000136631|VPS45	6554.04	0.0853456	0.0967114	0.882477	0.377519	0.750079
ENSG00000286019|NOTCH2NLB	378.852	-0.171261	0.238986	-0.716615	0.473612	0.811173
ENSG00000265491|RNF115	10201.4	-0.0798606	0.0919268	-0.868741	0.384989	0.754452
ENSG00000198765|SYCP1	0	NA	NA	NA	NA	NA
ENSG00000143398|PIP5K1A	31802.9	0.164081	0.091133	1.80046	0.0717879	0.39321
ENSG00000196505|GDAP2	5274.35	0.158449	0.117152	1.35251	0.176212	0.564083
ENSG00000117360|PRPF3	11525.4	0.0526811	0.090115	0.584599	0.558818	0.856139
ENSG00000154451|GBP5	1669.37	-0.388884	0.155766	-2.4966	0.0125391	0.167823
ENSG00000118655|DCLRE1B	2144.28	0.376227	0.125526	2.99721	0.00272462	0.0669014
ENSG00000269713|NBPF9	6224.3	0.210998	0.110852	1.90342	0.0569861	0.356497
ENSG00000256374|PPIAL4D	0.221993	-1.16486	4.99579	-0.233168	0.815631	NA
ENSG00000268043|NBPF12	2852.8	0.101979	0.110861	0.919881	0.357635	0.737337
ENSG00000116489|CAPZA1	24905.1	0.0614159	0.0906829	0.67726	0.498241	0.826519
ENSG00000155367|PPM1J	148.706	-0.281777	0.395391	-0.712654	0.47606	0.812883
ENSG00000134200|TSHB	0	NA	NA	NA	NA	NA
ENSG00000143442|POGZ	19803	0.0450498	0.112149	0.401696	0.687908	0.910509
ENSG00000118292|C1orf54	139.071	0.419359	0.354678	1.18237	0.237061	0.634034
ENSG00000065183|WDR3	30069.1	0.168511	0.111112	1.51658	0.129372	0.50121
ENSG00000235942|LCE6A	0	NA	NA	NA	NA	NA
ENSG00000023902|PLEKHO1	2292.62	-0.0628666	0.125911	-0.499295	0.617571	0.880905
ENSG00000163393|SLC22A15	1152.93	0.0670215	0.176631	0.379445	0.704358	0.915708
ENSG00000131778|CHD1L	4938.5	0.0428381	0.0985356	0.434747	0.663746	0.89962
ENSG00000163156|SCNM1	5861.05	-0.071883	0.121455	-0.591847	0.553953	0.852975
ENSG00000143631|FLG	141181	-0.206503	0.141913	-1.45514	0.14563	0.524373
ENSG00000159377|PSMB4	46507.4	-0.171565	0.102336	-1.67649	0.0936431	0.437365
ENSG00000270339|PPIAL4H	1.13112	1.99946	4.38215	0.456275	0.648192	NA
ENSG00000156150|ALX3	0.465012	-2.20496	4.89008	-0.450904	0.652059	NA
ENSG00000169469|SPRR1B	0	NA	NA	NA	NA	NA
ENSG00000177551|NHLH2	1.5751	0.432876	3.82223	0.113252	0.909831	NA
ENSG00000197323|TRIM33	10480.4	0.168872	0.115067	1.46759	0.142215	0.5203
ENSG00000244094|SPRR2F	0	NA	NA	NA	NA	NA
ENSG00000178104|PDE4DIP	12118.1	0.151887	0.110704	1.37201	0.17006	0.556789
ENSG00000079335|CDC14A	737.96	0.152654	0.20452	0.746404	0.455423	0.798546
ENSG00000143119|CD53	4.03949	-0.771964	2.82105	-0.273644	0.784358	NA
ENSG00000117362|APH1A	24606.4	-0.126545	0.104048	-1.21622	0.223901	0.622015
ENSG00000160685|ZBTB7B	12290.2	-0.254011	0.109751	-2.31443	0.020644	0.217767
ENSG00000143520|FLG2	104.17	0.13838	0.429485	0.322199	0.747302	0.929938
ENSG00000171943|SRGAP2C	3695.73	-0.0815314	0.114838	-0.709972	0.477722	0.813206
ENSG00000196734|LCE1B	0	NA	NA	NA	NA	NA
ENSG00000155761|SPAG17	781.43	-0.200034	0.172807	-1.15756	0.247045	0.64386
ENSG00000159208|CIART	824.527	-0.212548	0.202753	-1.04831	0.294494	0.690238
ENSG00000143373|ZNF687	10852.2	0.0233765	0.0916469	0.255071	0.798668	0.94656
ENSG00000116830|TTF2	9198.55	0.099144	0.110475	0.897438	0.369485	0.744543
ENSG00000143556|S100A7	0	NA	NA	NA	NA	NA
ENSG00000286219|NOTCH2NLC	958.669	0.0205447	0.223325	0.0919945	0.926702	0.981149
ENSG00000163218|PGLYRP4	0	NA	NA	NA	NA	NA
ENSG00000173207|CKS1B	13667.6	0.14052	0.096931	1.44969	0.147146	0.52633
ENSG00000143614|GATAD2B	7150.53	0.0705554	0.104279	0.676605	0.498657	0.826842
ENSG00000169418|NPR1	15193.2	-0.395301	0.0937979	-4.21439	2.50456e-05	0.00213607
ENSG00000285946	0	NA	NA	NA	NA	NA
ENSG00000081026|MAGI3	3182.68	0.254973	0.148702	1.71466	0.0864073	0.42304
ENSG00000116473|RAP1A	7250.72	0.0114104	0.0936614	0.121826	0.903037	0.97512
ENSG00000085465|OVGP1	163.846	-0.491637	0.379092	-1.29688	0.194672	0.587144
ENSG00000197364|S100A7L2	0	NA	NA	NA	NA	NA
ENSG00000186150|UBL4B	3.58206	1.59628	2.32931	0.685301	0.493154	NA
ENSG00000143554|SLC27A3	2655.47	-0.168607	0.13538	-1.24544	0.21297	0.60885
ENSG00000143458|GABPB2	3771.64	0.00306636	0.114513	0.0267773	0.978637	0.995375
ENSG00000118298|CA14	274.602	0.0249837	0.254015	0.0983552	0.92165	0.979956
ENSG00000143595|AQP10	1.48192	4.15386	4.60899	0.901252	0.367454	NA
ENSG00000073754|CD5L	0	NA	NA	NA	NA	NA
ENSG00000143546|S100A8	12.8928	-0.0678343	1.07625	-0.0630284	0.949744	0.988067
ENSG00000143416|SELENBP1	4567.03	-0.0291091	0.119574	-0.243441	0.807664	0.948719
ENSG00000131781|FMO5	334.051	-0.0995836	0.249708	-0.3988	0.690041	0.911054
ENSG00000286106|NOTCH2NLR	171.905	0.0110149	0.317819	0.0346577	0.972353	0.994004
ENSG00000121851|POLR3GL	1138.57	-0.105129	0.14466	-0.726733	0.467389	0.806304
ENSG00000134202|GSTM3	6296.18	0.166636	0.107761	1.54635	0.122021	0.488753
ENSG00000163220|S100A9	73.0714	-0.121808	0.481195	-0.253136	0.800163	0.94656
ENSG00000163155|LYSMD1	1174.16	0.0992199	0.152765	0.649493	0.51602	0.833623
ENSG00000163216|SPRR2D	0	NA	NA	NA	NA	NA
ENSG00000143603|KCNN3	72.1155	0.122474	0.491368	0.249251	0.803166	0.946825
ENSG00000160688|FLAD1	8258.34	-0.0606847	0.11459	-0.529579	0.596404	0.872593
ENSG00000116459|ATP5PB	22264.9	-0.120943	0.0928399	-1.30271	0.192674	0.584917
ENSG00000163344|PMVK	3371.73	-0.236018	0.119552	-1.97418	0.048361	0.329826
ENSG00000162738|VANGL2	6599.88	0.0203997	0.109102	0.186978	0.851678	0.96243
ENSG00000143552|NUP210L	42.8816	-0.182126	0.622042	-0.292787	0.769685	0.937776
ENSG00000186364|NUDT17	293.362	-0.00759426	0.31972	-0.0237529	0.98105	0.995605
ENSG00000175984|DENND2C	270.518	0.582448	0.344031	1.69301	0.0904537	0.431317
ENSG00000143127|ITGA10	35.0819	-0.662582	0.684745	-0.967633	0.333227	0.717197
ENSG00000186844|LCE1A	0	NA	NA	NA	NA	NA
ENSG00000241794|SPRR2A	0	NA	NA	NA	NA	NA
ENSG00000203783|PRR9	0	NA	NA	NA	NA	NA
ENSG00000143549|TPM3	54834.2	0.0087351	0.0847208	0.103105	0.91788	0.979018
ENSG00000116824|CD2	0.909125	3.43471	4.85042	0.708126	0.478867	NA
ENSG00000088035|ALG6	2008.12	0.0700429	0.134149	0.522129	0.60158	0.874408
ENSG00000163354|DCST2	113.464	-0.298656	0.40612	-0.73539	0.462102	0.801607
ENSG00000163206|SMCP	0	NA	NA	NA	NA	NA
ENSG00000024526|DEPDC1	9401.15	-0.239117	0.126899	-1.88431	0.0595227	0.36196
ENSG00000273136|NBPF26	2810.1	0.179903	0.13763	1.30715	0.191163	0.582979
ENSG00000162825|NBPF20	3091.65	0.208331	0.113712	1.83209	0.0669374	0.380131
ENSG00000169474|SPRR1A	0	NA	NA	NA	NA	NA
ENSG00000198019|FCGR1B	34.6719	-0.285198	0.678385	-0.420408	0.674187	0.903854
ENSG00000163352|LENEP	41.6464	0.284016	0.713117	0.398274	0.690428	0.911074
ENSG00000283227|SPRR5	0	NA	NA	NA	NA	NA
ENSG00000258465	35.2079	0.747174	0.720833	1.03654	0.299949	0.695199
ENSG00000288460|SMIM42	2.38202	-1.5766	3.34568	-0.471237	0.637472	NA
ENSG00000117262|GPR89A	4687.86	0.0123057	0.105271	0.116896	0.906943	0.976647
ENSG00000203782|LORICRIN	0	NA	NA	NA	NA	NA
ENSG00000163263|C1orf189	16.3014	-1.05592	1.04464	-1.01079	0.312115	0.704131
ENSG00000143624|INTS3	16820.9	0.0027143	0.0864165	0.0314095	0.974943	0.994607
ENSG00000253831|ETV3L	0	NA	NA	NA	NA	NA
ENSG00000163221|S100A12	0	NA	NA	NA	NA	NA
ENSG00000271567|PPIAL4E	0.221993	-1.16486	4.99579	-0.233168	0.815631	NA
ENSG00000270629|NBPF14	3997.21	0.0807841	0.154859	0.521663	0.601905	0.874408
ENSG00000137947|GTF2B	3469.54	-0.0487752	0.110826	-0.440106	0.659861	0.898934
ENSG00000117586|TNFSF4	47.4739	-0.0322441	0.64157	-0.0502581	0.959917	0.990878
ENSG00000239887|C1orf226	560.354	-0.231048	0.194139	-1.19012	0.233999	0.631314
ENSG00000184330|S100A7A	0	NA	NA	NA	NA	NA
ENSG00000014914|MTMR11	821.597	0.12941	0.161167	0.802953	0.422002	0.779783
ENSG00000162728|KCNJ9	12.2013	-2.03923	1.55062	-1.31511	0.188474	0.579737
ENSG00000184371|CSF1	735.177	0.367282	0.173678	2.11472	0.0344536	0.280992
ENSG00000143375|CGN	23461.4	-0.201277	0.084881	-2.37128	0.0177265	0.20302
ENSG00000271425|NBPF10	2479.26	-0.0279506	0.137606	-0.203121	0.83904	0.959202
ENSG00000163154|TNFAIP8L2	10.6846	-1.56411	1.23086	-1.27074	0.20382	0.597118
ENSG00000143569|UBAP2L	37814.6	0.0399899	0.0836777	0.477904	0.632718	0.886978
ENSG00000184148|SPRR4	0	NA	NA	NA	NA	NA
ENSG00000196184|OR10J1	0	NA	NA	NA	NA	NA
ENSG00000162729|IGSF8	4103.63	-0.248587	0.109593	-2.26828	0.0233122	0.230923
ENSG00000143158|MPC2	2723.73	0.0453574	0.118869	0.381575	0.702777	0.915161
ENSG00000271092|TLCD4-RWDD3	84.8801	0.784149	0.501062	1.56497	0.117589	0.480854
ENSG00000162739|SLAMF6	0	NA	NA	NA	NA	NA
ENSG00000203785|SPRR2E	0	NA	NA	NA	NA	NA
ENSG00000159516|SPRR2G	0	NA	NA	NA	NA	NA
ENSG00000117281|CD160	82.2488	1.85046	0.544882	3.39607	0.000683603	0.0262851
ENSG00000000460|C1orf112	4649.81	0.240688	0.114877	2.09518	0.036155	0.287855
ENSG00000188859|FAM78B	12.2367	-0.430806	1.629	-0.264461	0.791425	0.945209
ENSG00000264522|OTUD7B	6299.2	0.101954	0.0982341	1.03787	0.299331	0.694628
ENSG00000163564|PYHIN1	0.697518	-2.79083	4.85518	-0.574816	0.565416	NA
ENSG00000135862|LAMC1	65602.9	0.108161	0.122253	0.884725	0.376305	0.748873
ENSG00000158473|CD1D	77.9517	-0.304372	0.492175	-0.618423	0.536297	0.844196
ENSG00000163191|S100A11	15688	-0.190129	0.1158	-1.64188	0.100614	0.450754
ENSG00000215853|RPTN	0.740962	3.15816	4.86418	0.649268	0.516165	NA
ENSG00000143198|MGST3	5125.44	-0.262268	0.131726	-1.99102	0.0464787	0.323174
ENSG00000143318|CASQ1	36.6394	-0.225727	0.674199	-0.334808	0.73777	0.926084
ENSG00000143297|FCRL5	0.697518	-2.79083	4.85518	-0.574816	0.565416	NA
ENSG00000162736|NCSTN	14959.4	0.102466	0.0932209	1.09917	0.271692	0.669487
ENSG00000117560|FASLG	3.16529	5.23857	2.8793	1.81939	0.0688514	NA
ENSG00000135823|STX6	6823.29	0.0773762	0.101275	0.764018	0.444856	0.791487
ENSG00000171722|SPATA46	8.48099	-0.136614	1.87166	-0.0729906	0.941814	0.985021
ENSG00000143621|ILF2	56405.8	-0.0388194	0.085433	-0.454385	0.649552	0.895277
ENSG00000143155|TIPRL	10455	-0.0561063	0.102064	-0.549718	0.582513	0.866762
ENSG00000143156|NME7	3157.87	-0.211048	0.107412	-1.96485	0.0494311	0.333615
ENSG00000198771|RCSD1	34.5825	0.101083	0.712031	0.141964	0.887108	0.971985
ENSG00000116147|TNR	4.3444	0.749921	2.76027	0.271684	0.785865	NA
ENSG00000213064|SFT2D2	18353.2	0.201886	0.139832	1.44377	0.148803	0.529026
ENSG00000143179|UCK2	11539.5	0.0286745	0.0925131	0.309951	0.756598	0.933177
ENSG00000143315|PIGM	5236.28	0.0119401	0.0977557	0.122143	0.902786	0.975028
ENSG00000116199|FAM20B	16719.5	0.130936	0.121367	1.07884	0.28066	0.676667
ENSG00000143185|XCL2	0	NA	NA	NA	NA	NA
ENSG00000007933|FMO3	37.5946	-0.134533	0.734851	-0.183075	0.854739	0.963172
ENSG00000280778	5.63392	-5.80729	2.34548	-2.47595	0.0132883	NA
ENSG00000116260|QSOX1	32728.8	-0.146905	0.0840955	-1.74689	0.0806568	0.410817
ENSG00000117475|BLZF1	6115.04	0.106296	0.09627	1.10415	0.269529	0.667352
ENSG00000143340|FAM163A	41.8461	-0.0350329	0.640085	-0.0547316	0.956352	0.990146
ENSG00000143190|POU2F1	10175	0.0552892	0.115374	0.479217	0.631784	0.886724
ENSG00000159348|CYB5R1	3441.17	-0.0814645	0.113867	-0.715435	0.47434	0.811175
ENSG00000075945|KIFAP3	2463.96	-0.149229	0.122501	-1.21819	0.223153	0.620865
ENSG00000162779|AXDND1	66.1202	0.0441255	0.545256	0.0809262	0.935501	0.982499
ENSG00000122432|SPATA1	46.5387	0.148014	0.603363	0.245315	0.806213	0.948367
ENSG00000092607|TBX15	17.7231	-0.248056	0.988044	-0.251058	0.80177	0.94666
ENSG00000117091|CD48	0	NA	NA	NA	NA	NA
ENSG00000163209|SPRR3	0	NA	NA	NA	NA	NA
ENSG00000122218|COPA	33905.7	0.0120991	0.0906974	0.133401	0.893876	0.972894
ENSG00000143171|RXRG	1.16253	-3.52856	4.82711	-0.730989	0.464786	NA
ENSG00000047410|TPR	35929.4	0.324417	0.153759	2.10991	0.0348663	0.283249
ENSG00000018625|ATP1A2	16.497	0.729101	1.66655	0.437492	0.661755	0.89954
ENSG00000171806|METTL18	888.419	-0.105756	0.169543	-0.62377	0.532779	0.842706
ENSG00000213088|ACKR1	0	NA	NA	NA	NA	NA
ENSG00000198574|SH2D1B	0	NA	NA	NA	NA	NA
ENSG00000134216|CHIA	2.59189	0.425166	3.20903	0.13249	0.894596	NA
ENSG00000162694|EXTL2	6276.82	0.0085753	0.105702	0.0811271	0.935341	0.982499
ENSG00000163207|IVL	0	NA	NA	NA	NA	NA
ENSG00000132716|DCAF8	13908.8	-0.108532	0.0869094	-1.24879	0.211741	0.607684
ENSG00000183853|KIRREL1	41415.2	-0.206529	0.105772	-1.95259	0.0508686	0.337594
ENSG00000143401|ANP32E	31399.1	0.0623858	0.110303	0.565587	0.571674	0.862217
ENSG00000118197|DDX59	1546.5	-0.0521795	0.129398	-0.40325	0.686764	0.910048
ENSG00000135842|NIBAN1	9649.92	0.342771	0.129688	2.64304	0.00821643	0.132939
ENSG00000198734|F5	13.658	-0.678099	1.2435	-0.545316	0.585537	0.867561
ENSG00000077152|UBE2T	4510.79	0.0759004	0.105234	0.721252	0.470754	0.808819
ENSG00000143164|DCAF6	10595.9	0.0695993	0.0997696	0.697601	0.485427	0.819414
ENSG00000133048|CHI3L1	193.302	-0.446035	0.342112	-1.30377	0.192312	0.584641
ENSG00000121454|LHX4	497.95	0.477604	0.26847	1.77898	0.0752427	0.400024
ENSG00000126070|AGO3	5560.17	0.386115	0.107257	3.59989	0.000318347	0.0156097
ENSG00000184155|OR10J5	0	NA	NA	NA	NA	NA
ENSG00000163157|TMOD4	129.058	0.439005	0.403691	1.08748	0.276827	0.673456
ENSG00000117036|ETV3	5995.42	0.191478	0.122958	1.55727	0.119406	0.484331
ENSG00000058085|LAMC2	10168.9	-0.0268333	0.0920618	-0.291471	0.770691	0.937956
ENSG00000183155|RABIF	1778.35	0.200908	0.134925	1.48903	0.136479	0.511762
ENSG00000117533|VAMP4	1781.05	0.157699	0.156559	1.00728	0.313799	0.704587
ENSG00000116815|CD58	1896.34	0.104293	0.123892	0.841811	0.399894	0.766789
ENSG00000116741|RGS2	343.482	0.320685	0.237869	1.34816	0.177608	0.565806
ENSG00000122482|ZNF644	10666.8	0.275999	0.158062	1.74615	0.0807856	0.41095
ENSG00000123843|C4BPB	0	NA	NA	NA	NA	NA
ENSG00000143167|GPA33	6.1624	-0.326864	2.01263	-0.162407	0.870985	0.967929
ENSG00000143184|XCL1	4.79852	-5.57477	2.45426	-2.27147	0.0231186	NA
ENSG00000203685|STUM	30.1326	0.619987	0.753144	0.823198	0.410395	0.774987
ENSG00000131788|PIAS3	5579.07	-0.145367	0.0967152	-1.50304	0.132828	0.505958
ENSG00000171786|NHLH1	51.2212	-0.849666	0.561012	-1.51452	0.129893	0.501736
ENSG00000177807|KCNJ10	62.4733	-0.0336309	0.506306	-0.066424	0.94704	0.986798
ENSG00000163485|ADORA1	8060.72	-0.420952	0.112521	-3.74111	0.000183206	0.0105666
ENSG00000123838|C4BPA	0	NA	NA	NA	NA	NA
ENSG00000000971|CFH	930.185	0.255799	0.177302	1.44273	0.149097	0.529545
ENSG00000118200|CAMSAP2	13067	0.482653	0.177992	2.71165	0.0066949	0.119806
ENSG00000143228|NUF2	4752.14	-0.0378972	0.112526	-0.336786	0.736278	0.925702
ENSG00000174514|MFSD4A	112.201	-0.493234	0.44039	-1.12	0.262716	0.659628
ENSG00000143178|TBX19	333.139	-0.361581	0.247767	-1.45936	0.144465	0.521623
ENSG00000162409|PRKAA2	4278.82	0.432848	0.169617	2.55192	0.0107132	0.154519
ENSG00000116833|NR5A2	59.3096	0.305493	0.538717	0.567075	0.570663	0.8619
ENSG00000135824|RGS8	2.65893	0.907469	3.18774	0.284675	0.775893	NA
ENSG00000000457|SCYL3	1711.92	0.0128139	0.137532	0.09317	0.925768	0.981147
ENSG00000286185	38.0553	0.615841	0.823548	0.74779	0.454587	0.798428
ENSG00000143507|DUSP10	1660.45	-0.00090768	0.152966	-0.00593385	0.995265	0.999483
ENSG00000198483|ANKRD35	6.51692	-1.44384	1.8734	-0.770708	0.44088	0.790122
ENSG00000143367|TUFT1	9022.93	0.256945	0.103565	2.481	0.0131016	0.172048
ENSG00000197959|DNM3	2315.4	-0.00766072	0.164211	-0.0466516	0.962791	0.991824
ENSG00000133063|CHIT1	22.6835	-0.878471	0.862053	-1.01905	0.308181	0.701318
ENSG00000180999|C1orf105	0.665978	-2.72825	4.85828	-0.561568	0.574411	NA
ENSG00000203784|LELP1	0	NA	NA	NA	NA	NA
ENSG00000157064|NMNAT2	8132.73	-0.619197	0.116595	-5.31065	1.09235e-07	2.57842e-05
ENSG00000203666|EFCAB2	1082.69	0.127548	0.146258	0.872073	0.383169	0.753284
ENSG00000059588|TARBP1	4362.74	0.222332	0.119141	1.86614	0.0620223	0.369827
ENSG00000265972|TXNIP	23100.5	0.477313	0.137212	3.47865	0.000503938	0.021547
ENSG00000143162|CREG1	31199.3	-0.0664318	0.10146	-0.65476	0.512622	0.833018
ENSG00000159166|LAD1	18066.8	-0.0213431	0.0995516	-0.214392	0.830241	0.956379
ENSG00000117153|KLHL12	8573.42	0.0982497	0.111222	0.883365	0.377039	0.749503
ENSG00000122224|LY9	0	NA	NA	NA	NA	NA
ENSG00000131779|PEX11B	1795.82	-0.125032	0.138028	-0.905847	0.365017	0.741502
ENSG00000162782|TDRD5	802.873	-0.115592	0.168208	-0.687197	0.491959	0.82297
ENSG00000162704|ARPC5	18277.9	0.0509145	0.0861489	0.591005	0.554517	0.853439
ENSG00000143653|SCCPDH	5171.76	0.053439	0.102392	0.521907	0.601735	0.874408
ENSG00000135837|CEP350	10649.8	0.3776	0.419746	0.899592	0.368337	0.743648
ENSG00000117595|IRF6	5033.08	0.000841662	0.101267	0.00831132	0.993369	0.999483
ENSG00000158711|ELK4	15758	0.248279	0.128167	1.93715	0.0527271	0.343728
ENSG00000163444|TMEM183A	11251.9	-0.079328	0.0936923	-0.846687	0.39717	0.764217
ENSG00000162851|TFB2M	5837.18	-0.0156189	0.0989641	-0.157824	0.874595	0.968719
ENSG00000143353|LYPLAL1	13.489	-0.477566	1.1625	-0.410809	0.681213	0.906769
ENSG00000197965|MPZL1	11029.8	-0.0239466	0.0915592	-0.261542	0.793674	0.945733
ENSG00000143493|INTS7	5614.67	0.312842	0.108504	2.88324	0.00393606	0.0849405
ENSG00000179397|CATSPERE	50.6814	0.393114	0.610785	0.643621	0.519821	0.834984
ENSG00000117592|PRDX6	35524.6	-0.0194591	0.0910559	-0.213705	0.830777	0.956379
ENSG00000152904|GGPS1	5131.28	-0.0116228	0.0978614	-0.118768	0.905459	0.976405
ENSG00000186197|EDARADD	131.848	1.1768	0.36583	3.21678	0.00129637	0.0414064
ENSG00000094963|FMO2	123.816	-0.54553	0.370805	-1.4712	0.141237	0.519637
ENSG00000162670|BRINP3	2.21993	-4.46408	3.99816	-1.11653	0.264195	NA
ENSG00000159176|CSRP1	17438.5	0.0930014	0.0931675	0.998217	0.318174	0.707928
ENSG00000162761|LMX1A	106.136	-0.155446	0.398615	-0.389964	0.696563	0.913128
ENSG00000143199|ADCY10	30.0729	0.459429	0.743519	0.617911	0.536634	0.844312
ENSG00000117479|SLC19A2	3243.34	0.225537	0.118238	1.90749	0.0564571	0.355456
ENSG00000179930|ZNF648	60.5769	0.326306	0.579228	0.563346	0.573199	0.862974
ENSG00000007908|SELE	0.697518	-2.79083	4.85518	-0.574816	0.565416	NA
ENSG00000092978|GPATCH2	3760.18	0.338991	0.126904	2.67125	0.00755704	0.126346
ENSG00000143499|SMYD2	3526.06	0.150699	0.106474	1.41537	0.156961	0.541111
ENSG00000163518|FCRL4	0	NA	NA	NA	NA	NA
ENSG00000188404|SELL	387.97	0.315929	0.217374	1.45339	0.146115	0.525177
ENSG00000143196|DPT	0	NA	NA	NA	NA	NA
ENSG00000203697|CAPN8	2.07153	-4.36236	3.35621	-1.29979	0.193674	NA
ENSG00000116574|RHOU	563.446	-0.302907	0.186887	-1.62081	0.105059	0.459873
ENSG00000186283|TOR3A	3098.24	0.0558131	0.11507	0.485035	0.627652	0.884528
ENSG00000159346|ADIPOR1	20520.4	0.0644154	0.0877947	0.733705	0.463128	0.802356
ENSG00000160856|FCRL3	0.909125	3.43471	4.85042	0.708126	0.478867	NA
ENSG00000121481|RNF2	5779.2	0.24772	0.104823	2.36323	0.0181165	0.205158
ENSG00000117139|KDM5B	21385.7	-0.0600071	0.109198	-0.549526	0.582644	0.866762
ENSG00000143248|RGS5	153.842	-0.263749	0.346593	-0.760975	0.446672	0.793002
ENSG00000132704|FCRL2	0	NA	NA	NA	NA	NA
ENSG00000162814|SPATA17	585.447	-0.117901	0.187264	-0.629596	0.528959	0.840067
ENSG00000163435|ELF3	14721.6	-0.076912	0.108655	-0.707856	0.479035	0.814079
ENSG00000116132|PRRX1	2.55921	4.93274	3.08233	1.60033	0.109526	NA
ENSG00000116679|IVNS1ABP	24656.9	-0.019637	0.110326	-0.17799	0.858731	0.964017
ENSG00000162706|CADM3	1.27206	-0.155029	4.13611	-0.0374819	0.970101	NA
ENSG00000021852|C8B	0	NA	NA	NA	NA	NA
ENSG00000152092|ASTN1	7.30122	1.88064	1.81461	1.03639	0.300019	0.69526
ENSG00000143476|DTL	3983.77	0.32647	0.108661	3.00448	0.00266036	0.0659259
ENSG00000121486|TRMT1L	3994.26	0.0324418	0.119619	0.271209	0.78623	0.943261
ENSG00000117594|HSD11B1	0.221993	-1.16486	4.99579	-0.233168	0.815631	NA
ENSG00000057252|SOAT1	14289.8	-0.206048	0.110798	-1.85968	0.0629312	0.371636
ENSG00000123685|BATF3	24.6783	0.161038	1.03768	0.15519	0.876671	0.969064
ENSG00000162852|CNST	5004.6	0.302711	0.121845	2.4844	0.0129771	0.171625
ENSG00000143842|SOX13	3808.23	-0.0597306	0.103673	-0.576142	0.564519	0.859147
ENSG00000116962|NID1	798.456	0.350178	0.178603	1.96064	0.0499207	0.334907
ENSG00000159388|BTG2	4741.65	-0.0638735	0.107895	-0.591998	0.553852	0.852975
ENSG00000154380|ENAH	69747.6	0.0971901	0.143289	0.678279	0.497595	0.826263
ENSG00000181450|ZNF678	1639.78	0.459542	0.197699	2.32445	0.0201015	0.214356
ENSG00000120333|MRPS14	2524.77	-0.105037	0.11436	-0.918472	0.358372	0.73744
ENSG00000117090|SLAMF1	0	NA	NA	NA	NA	NA
ENSG00000162753|SLC9C2	18.2171	-0.940097	0.944474	-0.995366	0.319558	0.70849
ENSG00000264343|NOTCH2NLA	923.199	0.16708	0.160238	1.0427	0.297088	0.69348
ENSG00000143355|LHX9	165.535	0.442086	0.413748	1.06849	0.285299	0.680221
ENSG00000117597|UTP25	6929.85	0.0985953	0.101887	0.967691	0.333199	0.717197
ENSG00000121644|DESI2	13091.2	0.133449	0.128313	1.04003	0.298326	0.693613
ENSG00000174502|SLC26A9	122.943	-0.276054	0.392293	-0.703694	0.481624	0.816748
ENSG00000158715|SLC45A3	2115.85	0.0794048	0.126034	0.630029	0.528676	0.840067
ENSG00000143195|ILDR2	97.3614	0.937478	0.413018	2.26983	0.0232182	0.230773
ENSG00000162849|KIF26B	621.739	-0.428072	0.21162	-2.02283	0.0430902	0.313657
ENSG00000067533|RRP15	7235.91	0.111712	0.0969643	1.15209	0.249283	0.645527
ENSG00000133055|MYBPH	18.8446	0.0395975	0.954487	0.0414856	0.966909	0.992535
ENSG00000196071|OR2L13	0	NA	NA	NA	NA	NA
ENSG00000116209|TMEM59	18081.2	-0.0751808	0.0968437	-0.776311	0.437566	0.788399
ENSG00000143643|TTC13	3891.13	-0.00594687	0.127886	-0.0465015	0.962911	0.991824
ENSG00000116161|CACYBP	18575.7	0.0191552	0.086303	0.221953	0.82435	0.954411
ENSG00000143847|PPFIA4	516.302	0.248166	0.234619	1.05774	0.290174	0.685424
ENSG00000173627|APOBEC4	0	NA	NA	NA	NA	NA
ENSG00000067704|IARS2	25180.1	0.0119653	0.102039	0.117262	0.906652	0.976647
ENSG00000077157|PPP1R12B	2608	0.249262	0.170732	1.45997	0.1443	0.521623
ENSG00000152104|PTPN14	29271.8	0.155809	0.154376	1.00928	0.312841	0.704168
ENSG00000162909|CAPN2	12818	-0.102183	0.087817	-1.16359	0.244588	0.641225
ENSG00000122180|MYOG	18.1516	-1.79965	0.959642	-1.87534	0.0607461	0.365891
ENSG00000117650|NEK2	4864.43	-0.0420037	0.110757	-0.379242	0.704508	0.915775
ENSG00000203724|C1orf53	428.065	-0.0474886	0.290419	-0.163518	0.870111	0.967655
ENSG00000158764|ITLN2	1.99793	-4.31209	4.14887	-1.03934	0.298645	NA
ENSG00000188783|PRELP	254.867	0.234757	0.320071	0.733453	0.463282	0.802449
ENSG00000284188	3.41215	1.45783	2.02129	0.721239	0.470763	NA
ENSG00000168118|RAB4A	8830.82	-0.123516	0.0974045	-1.26808	0.20477	0.597831
ENSG00000173726|TOMM20	39729.7	0.0388414	0.0860204	0.451537	0.651602	0.895706
ENSG00000270188|MTRNR2L11	0	NA	NA	NA	NA	NA
ENSG00000152382|TADA1	1668.73	0.047087	0.126932	0.370962	0.710666	0.918164
ENSG00000143839|REN	70.4599	-0.562182	0.527039	-1.06668	0.286116	0.680775
ENSG00000187080|OR2AK2	0	NA	NA	NA	NA	NA
ENSG00000173409|ARV1	3984.42	-0.118719	0.106117	-1.11875	0.263246	0.66034
ENSG00000143514|TP53BP2	12299.6	0.137932	0.112339	1.22782	0.219516	0.616059
ENSG00000143469|SYT14	6.51027	1.16784	1.94654	0.599958	0.548535	0.85044
ENSG00000135829|DHX9	43609.8	0.0755279	0.108894	0.693591	0.487939	0.821002
ENSG00000134717|BTF3L4	11426.1	0.0256363	0.0885496	0.289514	0.772188	0.938686
ENSG00000116668|SWT1	808.696	-0.0201803	0.170687	-0.11823	0.905886	0.976469
ENSG00000188610|FAM72B	2872.24	-0.422869	0.112995	-3.74236	0.000182299	0.0105523
ENSG00000143756|FBXO28	9852.73	0.14214	0.0918973	1.54673	0.121928	0.488748
ENSG00000143702|CEP170	3262.28	0.535878	0.187753	2.85417	0.00431489	0.0896179
ENSG00000185860|CCDC190	0	NA	NA	NA	NA	NA
ENSG00000143207|COP1	6002.92	-0.0340402	0.100107	-0.340037	0.733829	0.924944
ENSG00000122176|FMOD	10.002	0.380914	1.26509	0.301095	0.763342	0.935092
ENSG00000240021|TEX35	34.9288	-0.447305	0.685165	-0.652842	0.513858	0.833356
ENSG00000026751|SLAMF7	0.740962	3.15816	4.86418	0.649268	0.516165	NA
ENSG00000150681|RGS18	1.48192	4.15386	4.60899	0.901252	0.367454	NA
ENSG00000116906|GNPAT	10750.2	0.0169671	0.088846	0.190972	0.848548	0.961663
ENSG00000092969|TGFB2	10328.2	0.02798	0.135704	0.206184	0.836647	0.958669
ENSG00000163545|NUAK2	12176.9	-0.773251	0.139293	-5.55125	2.83627e-08	7.97838e-06
ENSG00000157181|ODR4	6394.18	0.130284	0.127687	1.02034	0.307567	0.700999
ENSG00000143153|ATP1B1	3278.72	0.572304	0.116438	4.9151	8.87381e-07	0.000146683
ENSG00000120332|TNN	12.6534	0.423702	1.18109	0.358738	0.719791	0.91956
ENSG00000076258|FMO4	208.776	0.0893325	0.308973	0.289127	0.772484	0.938769
ENSG00000117697|NSL1	4287.93	0.0638874	0.105948	0.603009	0.546503	0.849706
ENSG00000162669|HFM1	199.142	-0.139845	0.348631	-0.401126	0.688327	0.910764
ENSG00000132681|ATP1A4	6.79671	-1.47869	1.88089	-0.786164	0.431771	0.78601
ENSG00000143641|GALNT2	35574.6	-0.195791	0.0842319	-2.32442	0.0201029	0.214356
ENSG00000010932|FMO1	67.3888	-1.09591	0.49514	-2.21334	0.0268743	0.247742
ENSG00000010072|SPRTN	2528.8	0.207719	0.120174	1.72849	0.0839007	0.419347
ENSG00000135766|EGLN1	9467.1	0.065602	0.105588	0.621303	0.5344	0.843264
ENSG00000215817|ZC3H11B	1199.33	0.146781	0.159769	0.918704	0.35825	0.73744
ENSG00000163534|FCRL1	0	NA	NA	NA	NA	NA
ENSG00000143816|WNT9A	86.4392	0.47993	0.456534	1.05125	0.293146	0.688491
ENSG00000168243|GNG4	41.69	0.665741	0.614997	1.08251	0.279026	0.675274
ENSG00000116183|PAPPA2	66.4919	-0.493337	0.533733	-0.924314	0.355323	0.736049
ENSG00000116218|NPHS2	9.92437	-1.97875	1.60739	-1.23104	0.21831	0.61518
ENSG00000270106|TSNAX-DISC1	6.32462	1.02286	1.97358	0.518275	0.604267	0.875456
ENSG00000170382|LRRN2	2576.69	-0.664844	0.119081	-5.58314	2.36209e-08	7.146e-06
ENSG00000066027|PPP2R5A	12834.1	-0.0989947	0.096328	-1.02768	0.304099	0.698656
ENSG00000162733|DDR2	84.3646	0.105398	0.448386	0.235061	0.814161	0.950369
ENSG00000117477|CCDC181	737.132	0.0834243	0.182677	0.456676	0.647904	0.895074
ENSG00000188770|OPTC	0.88797	-3.14277	4.84002	-0.64933	0.516125	NA
ENSG00000173728|C1orf100	15.9502	-0.00607002	1.04735	-0.00579558	0.995376	0.999483
ENSG00000094975|SUCO	6945.64	0.212671	0.164166	1.29546	0.19516	0.587499
ENSG00000162772|ATF3	1548	0.297753	0.156707	1.90006	0.0574254	0.357022
ENSG00000135828|RNASEL	2247.93	0.256784	0.133619	1.92176	0.0546355	0.348504
ENSG00000076356|PLXNA2	529.037	-0.405917	0.191317	-2.12169	0.0338635	0.277555
ENSG00000185523|SPATA45	2.81388	0.162941	3.12832	0.0520859	0.95846	NA
ENSG00000116711|PLA2G4A	443.333	0.133552	0.246436	0.541932	0.587865	0.868499
ENSG00000143845|ETNK2	3431.85	0.123794	0.151863	0.815167	0.414977	0.775765
ENSG00000069812|HES2	238.533	0.0169206	0.28275	0.059843	0.952281	0.988877
ENSG00000157060|SHCBP1L	0	NA	NA	NA	NA	NA
ENSG00000009790|TRAF3IP3	19.3827	-1.19137	1.18613	-1.00442	0.315174	0.705303
ENSG00000116698|SMG7	37017.9	0.00414366	0.116893	0.0354485	0.971722	0.994004
ENSG00000162813|BPNT1	5111.34	0.0922413	0.10079	0.915187	0.360094	0.738802
ENSG00000123684|LPGAT1	7829.78	0.262997	0.143008	1.83904	0.0659092	0.377964
ENSG00000117707|PROX1	17.415	0.329496	0.948479	0.347394	0.728295	0.923469
ENSG00000196482|ESRRG	1403.5	0.0644714	0.217907	0.295867	0.767332	0.936144
ENSG00000123836|PFKFB2	6736.3	0.227996	0.151346	1.50646	0.13195	0.505243
ENSG00000117691|NENF	1923.38	0.0464779	0.165465	0.280893	0.778793	0.940865
ENSG00000118873|RAB3GAP2	12060.2	0.245306	0.113534	2.16063	0.030724	0.264569
ENSG00000287856	6.66736	0.0653569	2.02029	0.0323503	0.974193	0.994284
ENSG00000284299	37.2663	0.0809029	0.681244	0.118757	0.905467	0.976405
ENSG00000203705|TATDN3	1715.3	0.0759737	0.133968	0.567102	0.570645	0.8619
ENSG00000174175|SELP	0	NA	NA	NA	NA	NA
ENSG00000081237|PTPRC	34.4889	-0.221021	0.684829	-0.32274	0.746892	0.929938
ENSG00000008118|CAMK1G	6.05726	-0.298795	2.56288	-0.116586	0.907188	0.976647
ENSG00000171161|ZNF672	2845.36	-0.0207917	0.109813	-0.189337	0.849829	0.962025
ENSG00000117143|UAP1	5630.58	0.138551	0.10677	1.29765	0.194406	0.587109
ENSG00000152332|UHMK1	22858.4	0.395941	0.166088	2.38392	0.0171291	0.19851
ENSG00000162757|C1orf74	1269.55	0.136688	0.144077	0.948717	0.342764	0.725899
ENSG00000196878|LAMB3	11525.5	-0.0367507	0.0954997	-0.384826	0.700366	0.914173
ENSG00000133059|DSTYK	9356.72	-0.0513031	0.0977302	-0.524946	0.599621	0.873949
ENSG00000186007|LEMD1	497.182	-0.743827	0.200805	-3.70422	0.000212045	0.0117645
ENSG00000074964|ARHGEF10L	665.887	0.0181118	0.189251	0.0957022	0.923757	0.980466
ENSG00000116918|TSNAX	9655.68	0.15756	0.0990175	1.59123	0.111557	0.469561
ENSG00000285053|TBCE	1812.21	0.202694	0.166693	1.21597	0.223995	0.62202
ENSG00000231767|RPS27AP5	510.339	-0.176319	0.226391	-0.778828	0.436081	0.788203
ENSG00000198929|NOS1AP	200.425	0.304128	0.35204	0.863902	0.387642	0.756413
ENSG00000162771|FAM71A	1.65009	4.30228	3.61025	1.19168	0.233385	NA
ENSG00000176393|RNPEP	13647.8	-0.113946	0.100852	-1.12984	0.258545	0.656194
ENSG00000174606|ANGEL2	5490.17	0.192063	0.127871	1.50201	0.133095	0.506419
ENSG00000179914|ITLN1	2.09255	-4.37681	4.08653	-1.07103	0.284155	NA
ENSG00000235750|KIAA0040	13924.1	-0.0849893	0.0929856	-0.914005	0.360714	0.739096
ENSG00000121446|RGSL1	0	NA	NA	NA	NA	NA
ENSG00000123689|G0S2	35.0224	0.47204	0.711475	0.663467	0.507032	0.83033
ENSG00000116903|EXOC8	2819.71	0.225166	0.121252	1.857	0.0633106	0.371861
ENSG00000118194|TNNT2	1256.9	0.0558995	0.215401	0.259513	0.795239	0.94656
ENSG00000281406|BLACAT1	3464.79	-0.227039	0.115132	-1.97198	0.0486115	0.33083
ENSG00000143333|RGS16	164.204	-0.162582	0.325381	-0.499668	0.617309	0.880884
ENSG00000254706	5.91715	-0.453022	1.55619	-0.291109	0.770968	0.938058
ENSG00000198626|RYR2	234.843	0.0148548	0.331331	0.0448337	0.96424	0.992268
ENSG00000198797|BRINP2	0	NA	NA	NA	NA	NA
ENSG00000151414|NEK7	6540.59	0.325798	0.150231	2.16865	0.0301091	0.262248
ENSG00000177614|PGBD5	29.4853	0.000663649	0.760256	0.000872928	0.999304	0.999865
ENSG00000183831|ANKRD45	485.306	0.181847	0.246504	0.737705	0.460693	0.801271
ENSG00000143858|SYT2	60.013	-0.546468	0.56387	-0.969138	0.332477	0.717005
ENSG00000197472|ZNF695	1526.3	0.521704	0.143585	3.6334	0.000279708	0.0141925
ENSG00000188585|CLEC20A	0	NA	NA	NA	NA	NA
ENSG00000283952	0	NA	NA	NA	NA	NA
ENSG00000136643|RPS6KC1	9024.46	0.113633	0.116367	0.976503	0.328815	0.714826
ENSG00000133069|TMCC2	4560.2	-0.520426	0.1009	-5.15784	2.49821e-07	5.20212e-05
ENSG00000162877|PM20D1	55.0948	0.907836	0.560423	1.61991	0.105251	0.460162
ENSG00000135747|ZNF670-ZNF695	227.406	0.386691	0.274757	1.40739	0.159312	0.543981
ENSG00000069248|NUP133	10444.6	0.136377	0.100789	1.35309	0.176026	0.563898
ENSG00000117791|MTARC2	800.175	0.431214	0.163265	2.6412	0.00826128	0.133506
ENSG00000117724|CENPF	44877.9	-0.125496	0.190263	-0.659591	0.509516	0.831002
ENSG00000086619|ERO1B	401.344	0.130898	0.216124	0.60566	0.544741	0.848384
ENSG00000253148|RGS21	0	NA	NA	NA	NA	NA
ENSG00000090104|RGS1	0	NA	NA	NA	NA	NA
ENSG00000198700|IPO9	35886.8	0.224423	0.102579	2.18781	0.0286832	0.256073
ENSG00000163568|AIM2	0	NA	NA	NA	NA	NA
ENSG00000159450|TCHH	134.159	-0.478117	0.377683	-1.26592	0.205542	0.598775
ENSG00000143322|ABL2	8103.57	0.280903	0.149906	1.87386	0.0609491	0.366426
ENSG00000185220|PGBD2	1089.89	-0.0198463	0.158691	-0.125062	0.900474	0.974492
ENSG00000131791|PRKAB2	4129.61	0.180955	0.14934	1.2117	0.225627	0.622561
ENSG00000162769|FLVCR1	3779.93	0.368667	0.130785	2.81886	0.00481938	0.0958734
ENSG00000133065|SLC41A1	19114.9	0.268198	0.0871264	3.07826	0.00208215	0.056585
ENSG00000042781|USH2A	51.2713	0.796035	0.633116	1.25733	0.208634	0.603399
ENSG00000277462|ZNF670	1169.76	0.125731	0.157379	0.79891	0.424343	0.780809
ENSG00000035687|ADSS2	9854.77	0.089497	0.0993971	0.900399	0.367908	0.743585
ENSG00000182898|TCHHL1	0	NA	NA	NA	NA	NA
ENSG00000180287|PLD5	0	NA	NA	NA	NA	NA
ENSG00000077585|GPR137B	1985.68	0.0972998	0.126025	0.772069	0.440074	0.789896
ENSG00000136628|EPRS1	38775.7	0.156409	0.116695	1.34031	0.180143	0.569146
ENSG00000163431|LMOD1	174.974	-0.237287	0.369731	-0.641783	0.521014	0.835645
ENSG00000135835|KIAA1614	407.88	-0.0174835	0.240159	-0.0727997	0.941965	0.985021
ENSG00000230124|ACBD6	6158.68	-0.09793	0.0997487	-0.981768	0.326214	0.712098
ENSG00000143473|KCNH1	0.88797	-3.14277	4.84002	-0.64933	0.516125	NA
ENSG00000007341|ST7L	1410.91	0.0567742	0.133398	0.4256	0.6704	0.903033
ENSG00000134369|NAV1	3642.89	-0.0601091	0.155212	-0.387271	0.698556	0.913667
ENSG00000117222|RBBP5	7371.2	0.268677	0.133203	2.01706	0.0436897	0.315442
ENSG00000198216|CACNA1E	5.5646	-0.948399	1.64315	-0.577183	0.563816	NA
ENSG00000143324|XPR1	18031.4	0.0165162	0.119938	0.137705	0.890473	0.972075
ENSG00000118193|KIF14	6493.52	-0.203407	0.206625	-0.984425	0.324907	0.711493
ENSG00000198842|STYXL2	0	NA	NA	NA	NA	NA
ENSG00000120341|SEC16B	1.85092	-0.568459	3.59616	-0.158074	0.874398	NA
ENSG00000198756|COLGALT2	197.99	0.584657	0.408759	1.43032	0.152624	0.535057
ENSG00000159173|TNNI1	809.245	-0.170852	0.183531	-0.930915	0.351898	0.734009
ENSG00000259823|LYPD8	4.078	-0.633988	1.85681	-0.341439	0.732773	NA
ENSG00000135749|PCNX2	6960.18	-0.129298	0.0960922	-1.34557	0.178442	0.567237
ENSG00000142875|PRKACB	4412.09	0.295515	0.135468	2.18144	0.0291508	0.258377
ENSG00000143786|CNIH3	269.958	-0.4417	0.256812	-1.71994	0.085444	0.421336
ENSG00000010165|EEF1AKNMT	9664.17	-0.00627898	0.0903007	-0.0695341	0.944565	0.986111
ENSG00000054282|SDCCAG8	1170.91	-0.012869	0.14547	-0.088465	0.929507	0.981386
ENSG00000116406|EDEM3	8904.36	0.300339	0.157999	1.90089	0.0573161	0.356896
ENSG00000279782|PPIAL4F	0.221993	-1.16486	4.99579	-0.233168	0.815631	NA
ENSG00000143126|CELSR2	39653.9	-0.197752	0.0947839	-2.08635	0.0369472	0.291397
ENSG00000183780|SLC35F3	24.0846	0.308113	0.897049	0.343474	0.731242	0.924227
ENSG00000127481|UBR4	27687.3	0.179339	0.143364	1.25094	0.210956	0.607068
ENSG00000162702|ZNF281	6466.64	0.16617	0.118207	1.40575	0.159797	0.544126
ENSG00000143194|MAEL	0.665978	-2.72825	4.85828	-0.561568	0.574411	NA
ENSG00000174307|PHLDA3	442.336	-0.061399	0.246401	-0.249183	0.803219	0.946825
ENSG00000054267|ARID4B	10451.5	0.129202	0.101671	1.27079	0.203804	0.597118
ENSG00000135845|PIGC	3150.52	-0.146665	0.111762	-1.3123	0.189419	0.580847
ENSG00000175137|SH3BP5L	9078.49	-0.200686	0.104929	-1.91259	0.0558004	0.353071
ENSG00000134245|WNT2B	1162	-1.13023	0.159245	-7.09744	1.27086e-12	1.27356e-09
ENSG00000069275|NUCKS1	189526	0.0611366	0.107456	0.568943	0.569395	0.861697
ENSG00000143674|MAP3K21	4260.33	0.163936	0.12281	1.33487	0.18192	0.570599
ENSG00000187889|FYB2	42.741	-0.527022	0.696593	-0.756571	0.449307	0.794931
ENSG00000134375|TIMM17A	10259.6	-0.0472322	0.0950154	-0.497101	0.619118	0.881218
ENSG00000097046|CDC7	3944.83	0.3555	0.129738	2.74013	0.00614147	0.112292
ENSG00000232113|TEX50	0	NA	NA	NA	NA	NA
ENSG00000203667|COX20	5464.44	-0.305828	0.130143	-2.34994	0.0187765	0.209508
ENSG00000263353|PPIAL4A	45.5218	0.0234334	0.613836	0.0381754	0.969548	0.99339
ENSG00000117114|ADGRL2	43010.9	0.0701746	0.141278	0.496712	0.619392	0.881218
ENSG00000203737|GPR52	18.6233	-0.373316	1.06802	-0.34954	0.726684	0.922794
ENSG00000185420|SMYD3	1532.83	-0.160421	0.133085	-1.20541	0.228046	0.625006
ENSG00000076321|KLHL20	4168.16	0.184135	0.113971	1.61563	0.106174	0.46114
ENSG00000143575|HAX1	10594.8	-0.152681	0.105012	-1.45393	0.145964	0.525105
ENSG00000143669|LYST	1053.03	0.326177	0.216341	1.5077	0.131631	0.504895
ENSG00000135778|NTPCR	9542.08	-0.0693633	0.0929535	-0.746215	0.455537	0.798546
ENSG00000117280|RAB29	4445.17	0.156792	0.102941	1.52313	0.127727	0.498897
ENSG00000157131|C8A	0	NA	NA	NA	NA	NA
ENSG00000082497|SERTAD4	2.68507	-0.985511	3.20597	-0.307399	0.75854	NA
ENSG00000136636|KCTD3	9716.83	0.240394	0.118866	2.02239	0.0431359	0.313657
ENSG00000163874|ZC3H12A	997.914	-0.103012	0.151282	-0.68093	0.495916	0.825103
ENSG00000285777	36.144	-0.00177146	0.77524	-0.00228504	0.998177	0.999865
ENSG00000163346|PBXIP1	8429.66	-0.147989	0.102226	-1.44767	0.147711	0.526772
ENSG00000054392|HHAT	7.78491	0.538119	1.47232	0.365489	0.714746	0.9182
ENSG00000183291|SELENOF	14600.6	-0.00865889	0.0923656	-0.0937458	0.925311	0.980995
ENSG00000122223|CD244	0	NA	NA	NA	NA	NA
ENSG00000117322|CR2	97.2449	0.180499	0.421617	0.42811	0.668571	0.90257
ENSG00000188739|RBM34	6273.41	0.0596506	0.105779	0.56392	0.572809	0.862774
ENSG00000163348|PYGO2	14911.8	-0.1043	0.09662	-1.07949	0.28037	0.676619
ENSG00000135750|KCNK1	1669.08	0.0114341	0.141479	0.0808179	0.935587	0.982525
ENSG00000203730|TEDDM1	6.23419	-0.248862	1.61166	-0.154413	0.877284	0.969159
ENSG00000116194|ANGPTL1	606.921	0.0743664	0.190418	0.390543	0.696135	0.913128
ENSG00000137975|CLCA2	10.1831	1.76442	1.6951	1.0409	0.297922	0.69361
ENSG00000153187|HNRNPU	122452	0.126879	0.10293	1.23266	0.217701	0.614545
ENSG00000143341|HMCN1	2760.6	0.215169	0.219365	0.98087	0.326657	0.71231
ENSG00000116703|PDC	0	NA	NA	NA	NA	NA
ENSG00000143149|ALDH9A1	8759.8	0.0531161	0.0957966	0.554467	0.579259	0.865838
ENSG00000162545|CAMK2N1	98.1406	0.0636697	0.409411	0.155515	0.876415	0.969064
ENSG00000090432|MUL1	3227.85	-0.202233	0.132842	-1.52236	0.127918	0.499279
ENSG00000183114|FAM43B	0	NA	NA	NA	NA	NA
ENSG00000158825|CDA	137.989	0.403015	0.362067	1.1131	0.265667	0.66325
ENSG00000158828|PINK1	933.84	-0.342763	0.20307	-1.68791	0.0914285	0.433077
ENSG00000134371|CDC73	8141.49	0.0822774	0.105997	0.776227	0.437615	0.788399
ENSG00000162630|B3GALT2	163.797	-0.224952	0.38415	-0.585583	0.558156	0.855892
ENSG00000066557|LRRC40	3465.92	0.125876	0.147363	0.854187	0.393001	0.760577
ENSG00000116754|SRSF11	22416.9	0.0807813	0.0909394	0.888298	0.374381	0.747797
ENSG00000118454|ANKRD13C	4380.12	0.127078	0.116485	1.09094	0.275298	0.672579
ENSG00000116761|CTH	690.744	0.0145315	0.179488	0.0809607	0.935473	0.982499
ENSG00000007968|E2F2	1350.89	0.39758	0.138057	2.87982	0.00397902	0.085637
ENSG00000117318|ID3	3813.21	-0.656977	0.132413	-4.96156	6.99291e-07	0.000119281
ENSG00000142676|RPL11	63441.7	-0.131873	0.0992911	-1.32814	0.184131	0.574611
ENSG00000011007|ELOA	16752.7	0.179719	0.0953122	1.88558	0.0593518	0.361843
ENSG00000057757|PITHD1	3866.85	0.111891	0.116876	0.957351	0.33839	0.721675
ENSG00000011009|LYPLA2	7330.75	-0.0584866	0.111587	-0.524136	0.600184	0.874358
ENSG00000117308|GALE	1240.22	-0.0456612	0.151817	-0.300765	0.763594	0.935115
ENSG00000080910|CFHR2	0	NA	NA	NA	NA	NA
ENSG00000134389|CFHR5	4.24581	0.482378	2.7738	0.173906	0.86194	NA
ENSG00000182901|RGS7	108.022	-0.494282	0.449679	-1.09919	0.271686	0.669487
ENSG00000132703|APCS	0	NA	NA	NA	NA	NA
ENSG00000132693|CRP	0	NA	NA	NA	NA	NA
ENSG00000158716|DUSP23	715.135	-0.634123	0.173689	-3.65092	0.000261301	0.0136029
ENSG00000181036|FCRL6	0	NA	NA	NA	NA	NA
ENSG00000158714|SLAMF8	0	NA	NA	NA	NA	NA
ENSG00000243284|VSIG8	4.41284	2.41674	2.1997	1.09867	0.271912	NA
ENSG00000213085|CFAP45	213.358	-0.421785	0.284388	-1.48313	0.138039	0.513855
ENSG00000085552|IGSF9	17899.3	-0.583847	0.0945747	-6.1734	6.68386e-10	2.97692e-07
ENSG00000162723|SLAMF9	11.25	-0.833412	1.20149	-0.693647	0.487904	0.821002
ENSG00000256029	144.47	0.34226	0.351118	0.974769	0.329675	0.714958
ENSG00000134668|SPOCD1	37.8593	0.175518	0.660284	0.265822	0.790376	0.944787
ENSG00000163399|ATP1A1	161193	-0.155433	0.0810778	-1.91708	0.0552273	0.350283
ENSG00000177888|ZBTB41	3334.56	0.460485	0.200149	2.30071	0.0214078	0.221798
ENSG00000243364|EFNA4	1633.66	0.0996277	0.135729	0.734017	0.462938	0.802181
ENSG00000251246	5.74977	-0.922373	2.56768	-0.359224	0.719427	0.91956
ENSG00000143590|EFNA3	686.455	0.0813065	0.178505	0.455485	0.64876	0.895225
ENSG00000169242|EFNA1	3287.91	0.0213222	0.155659	0.13698	0.891047	0.972122
ENSG00000169241|SLC50A1	11655.7	0.0167474	0.0949469	0.176387	0.85999	0.964271
ENSG00000163463|KRTCAP2	7680.18	-0.21396	0.130653	-1.63761	0.101502	0.452582
ENSG00000273088	0	NA	NA	NA	NA	NA
ENSG00000163462|TRIM46	1304.21	0.0557138	0.153325	0.363369	0.716329	0.918923
ENSG00000185499|MUC1	1111.04	-0.0612059	0.205921	-0.297231	0.766291	0.936144
ENSG00000169231|THBS3	4271.44	-0.15158	0.107481	-1.41029	0.158453	0.543335
ENSG00000177628|GBA	5679.71	-0.118038	0.105176	-1.12229	0.26174	0.658933
ENSG00000160767|FAM189B	7404.17	0.0135784	0.0974362	0.139357	0.889168	0.971985
ENSG00000116521|SCAMP3	7528.09	-0.118595	0.119369	-0.993516	0.320459	0.708652
ENSG00000176444|CLK2	4488.07	0.00407128	0.107121	0.0380064	0.969683	0.99339
ENSG00000143630|HCN3	246.499	-0.0786114	0.282312	-0.278456	0.780663	0.941351
ENSG00000143627|PKLR	3.7925	-1.03304	2.87222	-0.359665	0.719098	NA
ENSG00000162594|IL23R	4.22911	-0.154322	2.33253	-0.066161	0.94725	NA
ENSG00000197721|CR1L	2.61911	1.54257	2.6255	0.587532	0.556846	NA
ENSG00000117335|CD46	23916.2	0.212516	0.118582	1.79215	0.0731091	0.39543
ENSG00000174059|CD34	243.17	0.580853	0.270231	2.14947	0.0315975	0.269051
ENSG00000142657|PGD	51794.9	0.00793257	0.0871911	0.0909791	0.927509	0.981193
ENSG00000251503|CENPS-CORT	433.475	-0.0984837	0.25603	-0.384657	0.700492	0.914189
ENSG00000175279|CENPS	5072.14	-0.141803	0.102337	-1.38565	0.165853	0.550805
ENSG00000160049|DFFA	31458.7	0.0584956	0.0857034	0.682536	0.4949	0.824811
ENSG00000081985|IL12RB2	77.3449	0.849162	0.528036	1.60815	0.107802	0.464183
ENSG00000122188|LAX1	11.0963	3.10147	1.58631	1.95514	0.0505664	0.337074
ENSG00000257315|ZBED6	3833.28	0.167092	0.760384	0.219748	0.826068	0.954568
ENSG00000288644	1.00453	0.272598	3.35862	0.0811638	0.935312	NA
ENSG00000182004|SNRPE	10430	0.0306266	0.108058	0.283427	0.77685	0.940644
ENSG00000130768|SMPDL3B	6477.23	-0.111085	0.110089	-1.00905	0.312952	0.704206
ENSG00000158156|XKR8	1303.15	0.0883798	0.165474	0.5341	0.593273	0.87175
ENSG00000182118|FAM89A	1988.64	-0.0790755	0.136249	-0.580375	0.561661	0.857624
ENSG00000143633|C1orf131	2014.82	0.025977	0.120396	0.215763	0.829172	0.956018
ENSG00000288208	5.68071	6.09102	2.97692	2.04608	0.0407484	NA
ENSG00000132773|TOE1	1496.65	0.203876	0.137094	1.48713	0.13698	0.512387
ENSG00000070759|TESK2	1214.86	0.0671417	0.147462	0.455314	0.648883	0.895225
ENSG00000280670|CCDC163	588.541	-0.119667	0.203477	-0.588112	0.556457	0.854539
ENSG00000132763|MMACHC	4698.92	-0.248977	0.0994192	-2.50432	0.0122689	0.166008
ENSG00000169224|GCSAML	3.12185	1.79406	3.05976	0.586341	0.557646	NA
ENSG00000177489|OR2G2	0	NA	NA	NA	NA	NA
ENSG00000177476|OR2G3	0	NA	NA	NA	NA	NA
ENSG00000162711|NLRP3	0	NA	NA	NA	NA	NA
ENSG00000133019|CHRM3	1499.41	-0.351095	0.13119	-2.67623	0.00744547	0.125532
ENSG00000162636|FAM102B	2589.57	0.0832106	0.157785	0.527366	0.59794	0.872932
ENSG00000162639|HENMT1	1834.45	-0.00467948	0.130052	-0.0359815	0.971297	0.993923
ENSG00000134186|PRPF38B	8829.83	0.115819	0.105891	1.09376	0.274059	0.671802
ENSG00000143107|FNDC7	18.0051	1.00178	1.5147	0.661375	0.508372	0.830634
ENSG00000116266|STXBP3	4467.15	0.147007	0.119234	1.23293	0.217602	0.614412
ENSG00000162641|AKNAD1	0.987949	3.57082	4.84455	0.73708	0.461074	NA
ENSG00000197780|TAF13	4859.94	0.150729	0.0997988	1.51033	0.13096	0.503968
ENSG00000215717|TMEM167B	3470.5	0.0359524	0.105088	0.342119	0.732262	0.924567
ENSG00000198452|OR14L1P	0	NA	NA	NA	NA	NA
ENSG00000132676|DAP3	29165.2	0.00322882	0.0867576	0.0372166	0.970312	0.993595
ENSG00000132718|SYT11	4922.02	-0.109669	0.118233	-0.927566	0.353633	0.735618
ENSG00000143622|RIT1	7274.68	0.113622	0.0991345	1.14614	0.251738	0.647996
ENSG00000132680|KHDC4	23461.2	0.18642	0.092059	2.02501	0.0428667	0.313491
ENSG00000116584|ARHGEF2	7397.97	0.219231	0.0978614	2.24022	0.0250764	0.239473
ENSG00000163479|SSR2	62039.9	-0.0461376	0.0930158	-0.496019	0.619881	0.881401
ENSG00000160803|UBQLN4	25223.2	0.00554234	0.0853551	0.0649327	0.948228	0.98745
ENSG00000116586|LAMTOR2	6663.33	-0.161846	0.113924	-1.42065	0.15542	0.538874
ENSG00000132698|RAB25	12732	-0.256851	0.111557	-2.30241	0.0213118	0.221461
ENSG00000196189|SEMA4A	2336.51	0.225663	0.137893	1.63651	0.101733	0.453234
ENSG00000260238|PMF1-BGLAP	817.161	-0.184962	0.226521	-0.816534	0.414195	0.775701
ENSG00000160783|PMF1	5857.11	-0.136751	0.125017	-1.09386	0.274018	0.671802
ENSG00000242252|BGLAP	35.9419	-0.768898	0.720988	-1.06645	0.28622	0.680875
ENSG00000198952|SMG5	27482	-0.0186132	0.0916572	-0.203074	0.839077	0.959202
ENSG00000163472|TMEM79	1459.18	-0.0842054	0.143933	-0.585034	0.558525	0.856027
ENSG00000198715|GLMP	7444.21	-0.0458099	0.103707	-0.441724	0.658689	0.898735
ENSG00000163468|CCT3	59145.5	-0.0278502	0.0874555	-0.31845	0.750143	0.931239
ENSG00000132677|RHBG	23.2385	0.241056	0.820406	0.293826	0.768891	0.937378
ENSG00000254726|MEX3A	40330.2	0.0601475	0.104331	0.576507	0.564273	0.859053
ENSG00000186377|CYP4X1	524.981	-0.239815	0.210533	-1.13908	0.254668	0.651459
ENSG00000186160|CYP4Z1	33.1593	-1.7397	0.721705	-2.41055	0.0159286	0.191631
ENSG00000162365|CYP4A22	2.98078	0.638267	3.10028	0.205874	0.83689	NA
ENSG00000162366|PDZK1IP1	1.39504	-3.79176	4.74173	-0.799657	0.42391	NA
ENSG00000162367|TAL1	35.5962	0.155788	0.706023	0.220655	0.825361	0.954568
ENSG00000186790|FOXE3	1.18495	0.747736	4.22583	0.176944	0.859552	NA
ENSG00000116701|NCF2	26.4837	-0.655269	0.855814	-0.765668	0.443874	0.79125
ENSG00000196352|CD55	5504.16	-0.0369057	0.107227	-0.344183	0.730708	0.924178
ENSG00000211452|DIO1	5.87474	0.27556	2.55515	0.107845	0.914119	0.978163
ENSG00000189030|VHLL	2.17944	1.10095	3.40241	0.323579	0.746257	NA
ENSG00000162763|LRRC52	15.6316	-0.701278	1.15163	-0.608945	0.542561	0.847313
ENSG00000081277|PKP1	19.6502	0.634214	0.918349	0.690602	0.489815	0.821617
ENSG00000143061|IGSF3	10355.7	0.373801	0.121874	3.0671	0.00216145	0.0579259
ENSG00000197915|HRNR	771.296	0.284249	0.271398	1.04735	0.294938	0.690471
ENSG00000004487|KDM1A	16257.1	-0.0109138	0.0869548	-0.125512	0.900119	0.974313
ENSG00000179172|HNRNPCL1	0.303042	1.81818	4.98036	0.365071	0.715059	NA
ENSG00000135821|GLUL	33588.3	0.0290028	0.0848369	0.341866	0.732452	0.924602
ENSG00000160691|SHC1	11412	-0.144275	0.0906681	-1.59124	0.111555	0.469561
ENSG00000203740|METTL11B	3.43244	-2.52401	2.37541	-1.06256	0.287982	NA
ENSG00000162374|ELAVL4	0.740962	3.15816	4.86418	0.649268	0.516165	NA
ENSG00000168275|COA6	2086.28	-0.127785	0.13944	-0.916412	0.359451	0.738334
ENSG00000241563|CORT	181.341	0.0904387	0.452717	0.199769	0.841661	0.959789
ENSG00000153207|AHCTF1	19184.5	0.349049	0.171494	2.03534	0.0418164	0.309134
ENSG00000250719|P3R3URF	0.465012	-2.20496	4.89008	-0.450904	0.652059	NA
ENSG00000156869|FRRS1	2630.12	-0.0389304	0.113127	-0.344129	0.730749	0.924178
ENSG00000033122|LRRC7	270.343	0.15296	0.276204	0.553793	0.579721	0.866007
ENSG00000151418|ATP6V1G3	0	NA	NA	NA	NA	NA
ENSG00000143278|F13B	0	NA	NA	NA	NA	NA
ENSG00000116678|LEPR	1315.01	0.233067	0.179339	1.29959	0.193742	0.5865
ENSG00000185630|PBX1	27406.1	-0.207756	0.156535	-1.32721	0.184439	0.575236
ENSG00000159352|PSMD4	34217.2	-0.0909035	0.0952294	-0.954574	0.339793	0.723289
ENSG00000158710|TAGLN2	77533.8	-0.324616	0.100335	-3.23532	0.00121507	0.039518
ENSG00000162734|PEA15	46761	-0.0289232	0.086814	-0.333164	0.739011	0.926423
ENSG00000066294|CD84	0.740962	3.15816	4.86418	0.649268	0.516165	NA
ENSG00000049239|H6PD	12176.4	-0.0527126	0.10333	-0.510137	0.609955	0.877238
ENSG00000186564|FOXD2	16.6423	-0.411897	0.976671	-0.421735	0.673218	0.903587
ENSG00000265241|RBM8A	21168.5	-0.0988072	0.0859104	-1.15012	0.250095	0.645527
ENSG00000244038|DDOST	35098.5	-0.0909941	0.0919851	-0.989227	0.322552	0.709717
ENSG00000158747|NBL1	6801.5	-0.218121	0.109676	-1.98878	0.0467258	0.323982
ENSG00000116690|PRG4	4.79	-0.670084	1.73112	-0.387081	0.698696	NA
ENSG00000163159|VPS72	10941.6	-0.0585288	0.102444	-0.571324	0.56778	0.86039
ENSG00000126091|ST3GAL3	926.235	-0.277807	0.156275	-1.77768	0.0754569	0.400282
ENSG00000162383|SLC1A7	0	NA	NA	NA	NA	NA
ENSG00000171163|ZNF692	2827.73	-0.148288	0.161387	-0.918834	0.358182	0.737429
ENSG00000127054|INTS11	23514.5	-0.0637149	0.0899523	-0.708319	0.478747	0.81385
ENSG00000172456|FGGY	613.974	-0.477838	0.201693	-2.36913	0.0178299	0.203691
ENSG00000162946|DISC1	2630.97	-0.306213	0.126854	-2.4139	0.0157828	0.190702
ENSG00000196660|SLC30A10	16.0946	-0.122453	1.07157	-0.114274	0.90902	0.977241
ENSG00000158786|PLA2G2F	0	NA	NA	NA	NA	NA
ENSG00000168389|MFSD2A	360.27	0.125286	0.259763	0.482309	0.629587	0.885677
ENSG00000160087|UBE2J2	17488.1	-0.176836	0.0992004	-1.78261	0.0746497	0.399013
ENSG00000118733|OLFM3	346.429	-0.602728	0.270621	-2.22721	0.0259334	0.242757
ENSG00000157870|PRXL2B	1313.06	-0.0353857	0.151726	-0.23322	0.81559	0.950754
ENSG00000163357|DCST1	46.6801	-0.304132	0.610466	-0.498196	0.618346	0.881216
ENSG00000179085|DPM3	1651.71	-0.453993	0.157915	-2.87493	0.00404121	0.0863958
ENSG00000155366|RHOC	11973.8	-0.208984	0.110913	-1.88422	0.059535	0.36196
ENSG00000173080|RXFP4	26.2179	0.910173	0.80016	1.13749	0.255334	0.652218
ENSG00000188782|CATSPER4	0	NA	NA	NA	NA	NA
ENSG00000198892|SHISA4	781.661	0.0302063	0.176979	0.170678	0.864477	0.966067
ENSG00000158055|GRHL3	701.339	-0.394409	0.204119	-1.93225	0.0533282	0.345341
ENSG00000183347|GBP6	170.176	-0.0938576	0.368627	-0.254614	0.799021	0.94656
ENSG00000175206|NPPA	24.1894	0.474099	1.00589	0.471324	0.63741	0.889257
ENSG00000120937|NPPB	0	NA	NA	NA	NA	NA
ENSG00000116685|KIAA2013	12080.2	-0.188935	0.104359	-1.81043	0.0702285	0.38867
ENSG00000083444|PLOD1	18040.2	0.13203	0.0897681	1.47079	0.141348	0.519637
ENSG00000116691|MIIP	3313.55	-0.411691	0.147122	-2.7983	0.0051372	0.0991213
ENSG00000120949|TNFRSF8	111.157	0.526658	0.415467	1.26763	0.204931	0.59797
ENSG00000162521|RBBP4	24052.2	0.181637	0.0983382	1.84706	0.0647381	0.374415
ENSG00000162520|SYNC	691.65	-0.625808	0.264598	-2.36513	0.0180238	0.20467
ENSG00000162522|KIAA1522	36833.2	-0.100553	0.0827253	-1.21551	0.224172	0.622094
ENSG00000116497|S100PBP	4570.46	0.211832	0.112149	1.88884	0.0589132	0.360769
ENSG00000160097|FNDC5	113.764	0.367268	0.383293	0.958191	0.337967	0.721388
ENSG00000121905|HPCA	11.6663	-0.0351521	1.45838	-0.0241034	0.98077	0.995605
ENSG00000121900|TMEM54	3795.97	-0.0287536	0.136815	-0.210164	0.83354	0.957422
ENSG00000121940|CLCC1	4654.79	0.299187	0.106621	2.80608	0.00501481	0.0974635
ENSG00000143222|UFC1	8332.29	-0.101059	0.117626	-0.859161	0.390252	0.758727
ENSG00000143258|USP21	4262.24	-0.0578619	0.120584	-0.479847	0.631336	0.886492
ENSG00000143224|PPOX	1010.1	-0.226692	0.176216	-1.28644	0.198288	0.589752
ENSG00000158850|B4GALT3	6458.81	-0.12401	0.106707	-1.16215	0.245176	0.642134
ENSG00000158859|ADAMTS4	60.1208	-0.136742	0.64627	-0.211587	0.832429	0.957061
ENSG00000158869|FCER1G	18.9593	0.990453	0.950596	1.04193	0.297445	0.693512
ENSG00000158874|APOA2	4.33351	-5.42784	2.5298	-2.14557	0.0319077	NA
ENSG00000158882|TOMM40L	2686.74	-0.159836	0.113725	-1.40546	0.159885	0.544126
ENSG00000143257|NR1I3	109.956	-0.105355	0.40687	-0.25894	0.795681	0.94656
ENSG00000248485|PCP4L1	89.3439	0.351916	0.427458	0.823276	0.410351	0.774987
ENSG00000188931|CFAP126	473.035	0.302242	0.241442	1.25182	0.210634	0.606884
ENSG00000265107|GJA5	21.5473	0.150027	0.84513	0.177519	0.859101	0.964017
ENSG00000121634|GJA8	40.4075	0.341682	0.696423	0.490624	0.623692	0.883034
ENSG00000188092|GPR89B	3323.2	-0.0423395	0.110072	-0.384653	0.700495	0.914189
ENSG00000116991|SIPA1L2	14810.5	-0.243953	0.126872	-1.92283	0.0545018	0.348317
ENSG00000116688|MFN2	40475.6	0.000667011	0.0830832	0.00802824	0.993594	0.999483
ENSG00000188800|TMCO2	0.740962	3.15816	4.86418	0.649268	0.516165	NA
ENSG00000084073|ZMPSTE24	13708.7	0.122226	0.09164	1.33376	0.182283	0.57129
ENSG00000049089|COL9A2	9494.62	-0.159021	0.123059	-1.29223	0.196277	0.587499
ENSG00000084070|SMAP2	5393.6	-0.0277046	0.0972007	-0.285025	0.775625	0.939952
ENSG00000187801|ZFP69B	413.838	0.129227	0.21375	0.604571	0.545464	0.849124
ENSG00000158887|MPZ	129.344	0.0486341	0.443101	0.109759	0.912601	0.978122
ENSG00000255054	1.35298	-3.74926	3.90723	-0.959569	0.337272	NA
ENSG00000117640|MTFR1L	7915.51	-0.14576	0.102371	-1.42384	0.154493	0.537573
ENSG00000127423|AUNIP	1765.53	0.18183	0.123954	1.46692	0.142399	0.5203
ENSG00000182749|PAQR7	492.105	0.0675599	0.200859	0.336354	0.736604	0.925895
ENSG00000117632|STMN1	26125.9	0.272659	0.0865232	3.15128	0.00162558	0.0476499
ENSG00000187147|RNF220	12946.5	-0.176454	0.100282	-1.75958	0.0784796	0.405917
ENSG00000126106|TMEM53	622.136	-0.149469	0.192825	-0.775154	0.438249	0.788739
ENSG00000198520|ARMH1	182.889	0.00577404	0.350455	0.0164758	0.986855	0.997329
ENSG00000142945|KIF2C	11279.3	-0.169125	0.0884526	-1.91204	0.0558706	0.353245
ENSG00000142937|RPS8	109236	-0.202322	0.10384	-1.94841	0.0513663	0.339072
ENSG00000142959|BEST4	36.8339	-0.224128	0.67086	-0.334091	0.738311	0.926084
ENSG00000173846|PLK3	273.465	-0.248833	0.275424	-0.903455	0.366284	0.742828
ENSG00000222009|BTBD19	2.32213	0.112061	3.34943	0.0334566	0.97331	NA
ENSG00000117425|PTCH2	96.1488	-0.259773	0.427948	-0.60702	0.543837	0.848156
ENSG00000070785|EIF2B3	3448.88	0.0446764	0.116034	0.38503	0.700215	0.914173
ENSG00000126107|HECTD3	4115.9	-0.198424	0.127683	-1.55403	0.120176	0.486008
ENSG00000126088|UROD	7285.07	-0.0822809	0.106924	-0.769527	0.44158	0.790122
ENSG00000162408|NOL9	17651.7	0.0928152	0.101311	0.916141	0.359593	0.738423
ENSG00000173662|TAS1R1	26.3297	0.287516	0.848162	0.338988	0.734619	0.924946
ENSG00000204859|ZBTB48	6782.66	-0.127582	0.137029	-0.931056	0.351825	0.733953
ENSG00000288629	1.00453	0.272598	3.35862	0.0811638	0.935312	NA
ENSG00000171488|LRRC8C	2320.7	0.375551	0.163739	2.29359	0.021814	0.223578
ENSG00000070886|EPHA8	9.18255	2.22435	1.72729	1.28777	0.197825	0.588812
ENSG00000173372|C1QA	0	NA	NA	NA	NA	NA
ENSG00000159189|C1QC	0	NA	NA	NA	NA	NA
ENSG00000173369|C1QB	0	NA	NA	NA	NA	NA
ENSG00000119285|HEATR1	28241.8	0.216591	0.135879	1.594	0.110937	0.469153
ENSG00000244020|MT1HL1	0	NA	NA	NA	NA	NA
ENSG00000117758|STX12	3920.13	0.201714	0.120404	1.67532	0.093872	0.437796
ENSG00000117751|PPP1R8	10069.1	-0.00934091	0.0908502	-0.102817	0.918109	0.979018
ENSG00000130775|THEMIS2	8545.43	-0.225924	0.116989	-1.93116	0.0534639	0.345751
ENSG00000117748|RPA2	6793.13	0.141211	0.0987436	1.43008	0.152695	0.535057
ENSG00000117122|MFAP2	1953.22	-0.0250768	0.129983	-0.192924	0.847018	0.960953
ENSG00000159363|ATP13A2	2360.24	-0.0665983	0.121771	-0.546916	0.584436	0.867512
ENSG00000117118|SDHB	6661.36	-0.121377	0.105414	-1.15143	0.249556	0.645527
ENSG00000117115|PADI2	331.92	-0.0905868	0.246234	-0.367889	0.712956	0.918164
ENSG00000142623|PADI1	3.26699	-1.73439	2.42954	-0.713873	0.475306	NA
ENSG00000142619|PADI3	15.0484	-0.416671	1.05519	-0.394878	0.692933	0.912266
ENSG00000142871|CCN1	50898.3	-0.124034	0.113518	-1.09263	0.274554	0.671962
ENSG00000143512|HHIPL2	149.477	-0.330744	0.363056	-0.910999	0.362296	0.74007
ENSG00000143498|TAF1A	1854.93	0.238562	0.127471	1.87151	0.061275	0.367495
ENSG00000154305|MIA3	10483	0.161325	0.139343	1.15776	0.246963	0.64386
ENSG00000186063|AIDA	6387.87	0.151984	0.104045	1.46076	0.144082	0.521623
ENSG00000162819|BROX	6984.53	0.0236349	0.115924	0.203884	0.838445	0.958957
ENSG00000197520|FAM177B	0.88797	-3.14277	4.84002	-0.64933	0.516125	NA
ENSG00000187554|TLR5	401.677	-2.32473	0.238128	-9.76253	1.63042e-22	1.3071e-18
ENSG00000164010|ERMAP	1837.66	-0.147907	0.125681	-1.17685	0.239256	0.635449
ENSG00000164011|ZNF691	1348.44	-0.132424	0.140692	-0.941232	0.346586	0.728594
ENSG00000154309|DISP1	2792.31	0.0407012	0.113393	0.358941	0.719639	0.91956
ENSG00000120370|GORAB	1287.24	0.233522	0.14943	1.56275	0.118111	0.482372
ENSG00000203857|HSD3B1	0	NA	NA	NA	NA	NA
ENSG00000143067|ZNF697	2032.36	0.200625	0.139291	1.44032	0.149776	0.53092
ENSG00000134240|HMGCS2	133.444	-1.36551	0.360367	-3.78921	0.000151128	0.00907562
ENSG00000134193|REG4	22.1367	-0.809076	0.853399	-0.948063	0.343098	0.725947
ENSG00000134249|ADAM30	2.88502	5.11242	2.94515	1.73588	0.0825852	NA
ENSG00000092621|PHGDH	45334.3	-0.133559	0.102374	-1.30461	0.192024	0.584013
ENSG00000027644|INSRR	4.81954	-5.5808	2.48123	-2.24921	0.0244993	NA
ENSG00000130764|LRRC47	16826.8	-0.100402	0.096797	-1.03725	0.299621	0.694846
ENSG00000284770|TBCE	3154.25	-0.0554882	0.134241	-0.413348	0.679351	0.906141
ENSG00000197587|DMBX1	237.726	-0.781579	0.295491	-2.64502	0.0081687	0.1323
ENSG00000198837|DENND4B	9174.45	-0.0919	0.0992027	-0.926387	0.354245	0.735747
ENSG00000160741|CRTC2	9374.63	-0.0963963	0.113971	-0.845796	0.397666	0.764514
ENSG00000143578|CREB3L4	3373.33	-0.000125894	0.119947	-0.00104958	0.999163	0.999865
ENSG00000143543|JTB	12291.4	-0.176127	0.122297	-1.44016	0.149822	0.53092
ENSG00000285641	809.043	-0.39006	0.259433	-1.50351	0.132708	0.505742
ENSG00000143545|RAB13	13457.9	-0.00568442	0.0945261	-0.060136	0.952047	0.988866
ENSG00000177954|RPS27	102691	-0.152471	0.106525	-1.43132	0.152339	0.535021
ENSG00000162642|C1orf52	4152.1	0.110242	0.102643	1.07403	0.282809	0.678419
ENSG00000142867|BCL10	3034.12	0.00821172	0.115205	0.071279	0.943176	0.985345
ENSG00000117394|SLC2A1	11702.7	-0.36439	0.0924376	-3.94201	8.08007e-05	0.00563286
ENSG00000116198|CEP104	10754.5	-0.0181452	0.0990935	-0.183112	0.85471	0.963172
ENSG00000169598|DFFB	2097.61	-0.286803	0.130733	-2.1938	0.0282497	0.254198
ENSG00000288626	1.00453	0.272598	3.35862	0.0811638	0.935312	NA
ENSG00000162836|ACP6	2644.36	-0.268959	0.122918	-2.18811	0.0286614	0.256021
ENSG00000116667|C1orf21	3158.54	-0.0965499	0.123922	-0.77912	0.435909	0.788156
ENSG00000125945|ZNF436	2277.28	-0.0863032	0.12192	-0.707869	0.479026	0.814079
ENSG00000204219|TCEA3	77.1559	0.540609	0.485424	1.11369	0.265414	0.66299
ENSG00000285779	0	NA	NA	NA	NA	NA
ENSG00000162885|B3GALNT2	3457.43	0.0930311	0.119181	0.780584	0.435047	0.787885
ENSG00000173110|HSPA6	11.8463	0.354226	1.1539	0.306981	0.758858	0.933956
ENSG00000162747|FCGR3B	0	NA	NA	NA	NA	NA
ENSG00000072694|FCGR2B	0	NA	NA	NA	NA	NA
ENSG00000143226|FCGR2A	1.77594	-4.14219	4.32858	-0.95694	0.338598	NA
ENSG00000143125|PROK1	11.288	-1.52915	1.2143	-1.25928	0.207928	0.60255
ENSG00000143105|KCNA10	0.493974	2.57767	4.90302	0.525732	0.599075	NA
ENSG00000177272|KCNA3	0	NA	NA	NA	NA	NA
ENSG00000177301|KCNA2	3.99605	-2.10845	2.84212	-0.741857	0.458174	NA
ENSG00000179456|ZBTB18	1686.45	0.023936	0.131177	0.182472	0.855213	0.963191
ENSG00000160753|RUSC1	7423.37	0.194511	0.110161	1.76571	0.0774451	0.403036
ENSG00000125459|MSTO1	4132.8	-0.144222	0.11236	-1.28357	0.199292	0.590874
ENSG00000160752|FDPS	28397.6	0.0819622	0.0960495	0.853333	0.393474	0.761034
ENSG00000121957|GPSM2	5700.23	-0.48443	0.11195	-4.32721	1.51007e-05	0.00141593
ENSG00000188396|DYNLT4	2.88886	1.74237	3.10404	0.561323	0.574577	NA
ENSG00000082482|KCNK2	3149.35	0.234757	0.121919	1.92552	0.0541641	0.347215
ENSG00000143612|C1orf43	23697.4	-0.112815	0.0914318	-1.23387	0.217251	0.614127
ENSG00000078618|NRDC	22352.1	0.0935883	0.090831	1.03036	0.302843	0.697536
ENSG00000116747|RO60	6608.95	0.469525	0.132499	3.54361	0.00039469	0.0182376
ENSG00000118729|CASQ2	17.0358	1.36307	0.976132	1.3964	0.162594	0.547942
ENSG00000134207|SYT6	0	NA	NA	NA	NA	NA
ENSG00000163467|TSACC	144.136	0.480137	0.366885	1.30868	0.190641	0.582458
ENSG00000243710|CFAP57	137.154	-0.728412	0.383597	-1.8989	0.0575774	0.357497
ENSG00000117395|EBNA1BP2	20067.5	-0.134383	0.0943867	-1.42375	0.154519	0.537573
ENSG00000120942|UBIAD1	11719.8	-0.094825	0.100386	-0.944606	0.34486	0.727217
ENSG00000116874|WARS2	2707.91	-0.0288352	0.11269	-0.25588	0.798043	0.94656
ENSG00000065600|PACC1	974.937	0.0315553	0.154312	0.20449	0.837971	0.958863
ENSG00000162576|MXRA8	436.104	-0.326089	0.234433	-1.39097	0.164235	0.54877
ENSG00000143006|DMRTB1	1.55395	-3.94956	4.54615	-0.86877	0.384973	NA
ENSG00000009780|FAM76A	936.789	-0.0354522	0.168102	-0.210897	0.832968	0.957237
ENSG00000023572|GLRX2	1783.02	0.123391	0.161114	0.765863	0.443758	0.79125
ENSG00000132694|ARHGEF11	9518.07	0.120449	0.095771	1.25767	0.20851	0.603343
ENSG00000077254|USP33	12704.5	0.170288	0.12367	1.37695	0.168528	0.554962
ENSG00000143537|ADAM15	12338.4	-0.0874121	0.109907	-0.79533	0.426422	0.781798
ENSG00000134644|PUM1	18651.9	-0.0544301	0.11231	-0.484643	0.627929	0.884528
ENSG00000215788|TNFRSF25	2988.52	-0.0366581	0.148561	-0.246754	0.805099	0.947829
ENSG00000143434|SEMA6C	931.809	0.0105499	0.170056	0.0620378	0.950533	0.988202
ENSG00000266472|MRPS21	8466.54	-0.0564414	0.114683	-0.49215	0.622613	0.882512
ENSG00000117834|SLC5A9	12.8943	-0.903418	1.12563	-0.802588	0.422213	0.779783
ENSG00000117625|RCOR3	6684.62	0.0811113	0.106739	0.759905	0.447311	0.793601
ENSG00000179902|C1orf194	25.9395	-0.466496	0.787855	-0.592109	0.553778	0.852975
ENSG00000020633|RUNX3	1068.07	-0.0441224	0.147558	-0.299017	0.764927	0.9358
ENSG00000121766|ZCCHC17	3255.68	0.10801	0.113133	0.954713	0.339723	0.723289
ENSG00000143157|POGK	17394.5	0.0955456	0.101528	0.941076	0.346666	0.728594
ENSG00000160058|BSDC1	8442.91	0.00666566	0.0974555	0.068397	0.94547	0.9867
ENSG00000162873|KLHDC8A	7910.63	-0.419554	0.0953545	-4.39994	1.0828e-05	0.00107836
ENSG00000162614|NEXN	200.834	0.381474	0.295751	1.28985	0.197103	0.58813
ENSG00000160781|PAQR6	512.644	-0.441121	0.244756	-1.80229	0.0714999	0.392068
ENSG00000143344|RGL1	3155.17	-0.125406	0.134749	-0.930659	0.35203	0.734094
ENSG00000142748|FCN3	3.70481	5.47489	3.35818	1.63032	0.103035	NA
ENSG00000162613|FUBP1	28430.3	0.0932821	0.0966442	0.965211	0.334439	0.717761
ENSG00000116882|HAO2	1.81825	4.43758	4.29149	1.03404	0.301116	NA
ENSG00000198758|EPS8L3	0.606083	2.84584	4.88317	0.582786	0.560038	NA
ENSG00000049247|UTS2	0.697518	-2.79083	4.85518	-0.574816	0.565416	NA
ENSG00000132849|PATJ	8401.11	0.136635	0.134996	1.01214	0.311473	0.703565
ENSG00000117569|PTBP2	2245.44	-0.0242773	0.13076	-0.185663	0.852709	0.962551
ENSG00000142856|ITGB3BP	2662.89	0.206683	0.115971	1.7822	0.0747173	0.399013
ENSG00000158022|TRIM63	0	NA	NA	NA	NA	NA
ENSG00000116396|KCNC4	46.3059	-0.174468	0.63424	-0.275083	0.783253	0.94251
ENSG00000058668|ATP2B4	26050	-0.140776	0.150973	-0.932454	0.351102	0.733199
ENSG00000163875|MEAF6	4340.05	0.0167914	0.101002	0.166249	0.867961	0.967655
ENSG00000116726|PRAMEF12	0	NA	NA	NA	NA	NA
ENSG00000282872|C1orf232	0.697518	-2.79083	4.85518	-0.574816	0.565416	NA
ENSG00000198821|CD247	25.3097	0.96728	0.846974	1.14204	0.253437	0.649657
ENSG00000162735|PEX19	8854.89	-0.030274	0.0913957	-0.331241	0.740463	0.926967
ENSG00000179163|FUCA1	1495.02	-0.066857	0.131681	-0.507719	0.611651	0.877721
ENSG00000131238|PPT1	20417.8	0.0513474	0.0874962	0.586853	0.557302	0.855181
ENSG00000171680|PLEKHG5	5845.25	0.0395624	0.112714	0.350997	0.72559	0.922637
ENSG00000075391|RASAL2	5672.65	0.322447	0.153105	2.10606	0.0351996	0.284041
ENSG00000116977|LGALS8	6953.48	0.0619689	0.0981754	0.631206	0.527906	0.839831
ENSG00000221978|CCNL2	24482.9	-0.0169708	0.116696	-0.145427	0.884373	0.971835
ENSG00000242485|MRPL20	15365.7	-0.205131	0.105897	-1.93708	0.0527362	0.343728
ENSG00000179403|VWA1	2761.7	0.123626	0.133764	0.924212	0.355376	0.736049
ENSG00000215915|ATAD3C	658.545	-0.14433	0.216078	-0.667957	0.504161	0.829123
ENSG00000135776|ABCB10	1754.11	0.231404	0.130438	1.77405	0.0760554	0.401539
ENSG00000135763|URB2	6088.32	0.234378	0.107746	2.17527	0.0296096	0.259858
ENSG00000135801|TAF5L	6512.5	0.0797478	0.107971	0.738604	0.460147	0.801023
ENSG00000178828|RNF186	0.697518	-2.79083	4.85518	-0.574816	0.565416	NA
ENSG00000169914|OTUD3	1942.51	0.200337	0.127656	1.56934	0.116568	0.478263
ENSG00000188784|PLA2G2E	0	NA	NA	NA	NA	NA
ENSG00000188257|PLA2G2A	0	NA	NA	NA	NA	NA
ENSG00000177186|OR2M7	0	NA	NA	NA	NA	NA
ENSG00000177174|OR14C36	0	NA	NA	NA	NA	NA
ENSG00000282881|TMEM275	0	NA	NA	NA	NA	NA
ENSG00000162456|KNCN	0	NA	NA	NA	NA	NA
ENSG00000079277|MKNK1	1710.01	-0.0586271	0.144115	-0.406807	0.68415	0.908665
ENSG00000142961|MOB3C	982.436	0.2926	0.157299	1.86015	0.062864	0.371636
ENSG00000117407|ARTN	315.429	-0.127551	0.244365	-0.521967	0.601693	0.874408
ENSG00000117408|IPO13	4421.26	0.0178552	0.110544	0.161521	0.871683	0.967973
ENSG00000132768|DPH2	7833.48	-0.217559	0.121409	-1.79195	0.0731409	0.39543
ENSG00000117410|ATP6V0B	4568.72	-0.14087	0.129157	-1.09069	0.275409	0.672727
ENSG00000159214|CCDC24	1223.48	-0.281096	0.159016	-1.76772	0.0771077	0.402946
ENSG00000196517|SLC6A9	2196.32	-0.143052	0.142281	-1.00542	0.314695	0.704818
ENSG00000175143|OR2T1	0	NA	NA	NA	NA	NA
ENSG00000196539|OR2T3	0	NA	NA	NA	NA	NA
ENSG00000203661|OR2T5	0	NA	NA	NA	NA	NA
ENSG00000183310|OR2T34	0	NA	NA	NA	NA	NA
ENSG00000189181|OR14I1	0.443985	-2.14427	4.89455	-0.438093	0.661319	NA
ENSG00000187238|LCE3B	0	NA	NA	NA	NA	NA
ENSG00000185962|LCE3A	0.443985	-2.14427	4.89455	-0.438093	0.661319	NA
ENSG00000187223|LCE2D	0	NA	NA	NA	NA	NA
ENSG00000187180|LCE2C	0	NA	NA	NA	NA	NA
ENSG00000159455|LCE2B	0	NA	NA	NA	NA	NA
ENSG00000187173|LCE2A	0	NA	NA	NA	NA	NA
ENSG00000204501|PRAMEF15	0	NA	NA	NA	NA	NA
ENSG00000204481|PRAMEF14	0	NA	NA	NA	NA	NA
ENSG00000204480|PRAMEF19	0.697518	-2.79083	4.85518	-0.574816	0.565416	NA
ENSG00000204479|PRAMEF17	0	NA	NA	NA	NA	NA
ENSG00000204478|PRAMEF20	0	NA	NA	NA	NA	NA
ENSG00000172031|EPHX4	1540.85	-0.102541	0.136201	-0.752867	0.45153	0.796213
ENSG00000230667|SETSIP	124.773	0.16131	0.369929	0.436058	0.662795	0.89962
ENSG00000228594|FNDC10	4891.99	-0.168594	0.123669	-1.36328	0.172796	0.560533
ENSG00000189409|MMP23B	159.593	-0.32763	0.323734	-1.01204	0.311521	0.703565
ENSG00000189339|SLC35E2B	27975.9	-0.00173886	0.0888205	-0.0195772	0.984381	0.996709
ENSG00000008128|CDK11A	11136.5	-0.150271	0.12506	-1.20159	0.229523	0.627052
ENSG00000008130|NADK	13776	0.00168965	0.0957105	0.0176537	0.985915	0.996983
ENSG00000078369|GNB1	91241	0.029749	0.0815113	0.364968	0.715136	0.9182
ENSG00000169885|CALML6	17.4143	0.452583	1.03522	0.437185	0.661977	0.89954
ENSG00000178821|TMEM52	261.322	0.230756	0.261364	0.882889	0.377296	0.749822
ENSG00000158477|CD1A	0	NA	NA	NA	NA	NA
ENSG00000158481|CD1C	0	NA	NA	NA	NA	NA
ENSG00000158485|CD1B	0	NA	NA	NA	NA	NA
ENSG00000158488|CD1E	0	NA	NA	NA	NA	NA
ENSG00000186306|OR10T2	0	NA	NA	NA	NA	NA
ENSG00000117505|DR1	10658.8	0.144936	0.0902901	1.60522	0.108445	0.465669
ENSG00000162889|MAPKAPK2	13439.3	0.0565255	0.0899551	0.628375	0.529759	0.840688
ENSG00000136634|IL10	8.37181	-1.03903	1.75925	-0.590609	0.554782	0.853572
ENSG00000162892|IL24	4.34938	-1.73694	2.21916	-0.782704	0.433801	NA
ENSG00000162894|FCMR	52.4299	0.661722	0.578677	1.14351	0.252827	0.649132
ENSG00000162896|PIGR	33.8728	0.34192	0.700605	0.488035	0.625525	0.883904
ENSG00000162897|FCAMR	1.21217	3.85178	4.83402	0.796805	0.425564	NA
ENSG00000182795|C1orf116	2038.27	-0.146639	0.135191	-1.08468	0.278062	0.674399
ENSG00000198890|PRMT6	7497.11	-0.130209	0.092403	-1.40914	0.158794	0.543518
ENSG00000142669|SH3BGRL3	6079.67	-0.192697	0.111051	-1.73521	0.0827034	0.416341
ENSG00000158062|UBXN11	1513.68	-0.298125	0.158197	-1.88451	0.0594956	0.36196
ENSG00000169442|CD52	0	NA	NA	NA	NA	NA
ENSG00000176083|ZNF683	0	NA	NA	NA	NA	NA
ENSG00000142910|TINAGL1	3079.12	0.0892563	0.108072	0.825895	0.408864	0.774085
ENSG00000121764|HCRTR1	1.23494	3.89128	4.8327	0.805197	0.420706	NA
ENSG00000162517|PEF1	3058.66	-0.1502	0.132314	-1.13518	0.256302	0.653138
ENSG00000084636|COL16A1	286.83	-0.0168536	0.26455	-0.0637069	0.949204	0.987832
ENSG00000085840|ORC1	3658.42	0.396581	0.10675	3.71505	0.000203167	0.0113901
ENSG00000203747|FCGR3A	0	NA	NA	NA	NA	NA
ENSG00000142224|IL19	30.8629	-1.31857	0.736995	-1.78912	0.0735958	0.396917
ENSG00000143751|SDE2	4476.12	0.153144	0.103058	1.48599	0.137282	0.51278
ENSG00000163041|H3-3A	48861.8	-0.0122217	0.0908118	-0.134583	0.892942	0.972553
ENSG00000182827|ACBD3	10526.8	0.152311	0.0980744	1.55301	0.12042	0.486471
ENSG00000185155|MIXL1	29.0598	0.116432	0.825659	0.141017	0.887856	0.971985
ENSG00000143753|DEGS1	4779.32	0.212334	0.0995977	2.13192	0.0330134	0.2737
ENSG00000143748|NVL	3869.06	0.0445298	0.105954	0.420274	0.674285	0.903854
ENSG00000143771|CNIH4	4909.89	-0.120669	0.101001	-1.19473	0.232192	0.629838
ENSG00000183682|BMP8A	111.948	0.301516	0.389504	0.774102	0.438871	0.789327
ENSG00000163909|HEYL	999.04	0.053299	0.155441	0.34289	0.731681	0.92449
ENSG00000116983|HPCAL4	172.006	0.493103	0.319986	1.54102	0.123313	0.490864
ENSG00000090621|PABPC4	28074.5	0.0260797	0.088071	0.296121	0.767138	0.936144
ENSG00000143374|TARS2	7318.65	-0.106514	0.0979216	-1.08775	0.276704	0.673456
ENSG00000143369|ECM1	144.544	-0.173877	0.37386	-0.465085	0.641871	0.891416
ENSG00000143420|ENSA	27777.4	-0.017208	0.0926068	-0.185817	0.852588	0.962551
ENSG00000143457|GOLPH3L	6813.47	-0.07558	0.0997777	-0.757484	0.44876	0.794723
ENSG00000143452|HORMAD1	1483.75	0.364474	0.154229	2.3632	0.018118	0.205158
ENSG00000143384|MCL1	56965.3	-0.0844902	0.106705	-0.791811	0.428471	0.78325
ENSG00000154342|WNT3A	10.0012	-0.802891	1.2536	-0.640466	0.52187	0.836105
ENSG00000143761|ARF1	37356.8	-0.110766	0.0943448	-1.17405	0.240374	0.636462
ENSG00000143793|C1orf35	2788.82	-0.111911	0.13389	-0.835845	0.403242	0.770421
ENSG00000162910|MRPL55	1890.75	-0.345556	0.130172	-2.65462	0.00793984	0.129773
ENSG00000198835|GJC2	137.514	-0.479355	0.358167	-1.33836	0.18078	0.56981
ENSG00000181873|IBA57	1217.04	-0.0301	0.14663	-0.205279	0.837354	0.958863
ENSG00000154370|TRIM11	4813.53	-0.0564681	0.115789	-0.487683	0.625774	0.884045
ENSG00000162931|TRIM17	148.759	0.138749	0.379049	0.366045	0.714332	0.918164
ENSG00000168148|H3-4	3.32059	0.967948	2.08324	0.464636	0.642192	NA
ENSG00000181218|H2AW	320.193	-1.20754	0.249291	-4.8439	1.27317e-06	0.000194419
ENSG00000196890|H2BU1	109.524	-0.964227	0.402102	-2.39797	0.0164863	0.19523
ENSG00000168159|RNF187	6495.56	-0.0667527	0.119705	-0.557643	0.577088	0.864545
ENSG00000171960|PPIH	6304.43	0.0430677	0.10057	0.428238	0.668478	0.902524
ENSG00000065978|YBX1	138287	-0.0255071	0.0841016	-0.303289	0.76167	0.934221
ENSG00000164007|CLDN19	4.02501	-1.15816	2.82462	-0.410024	0.681788	NA
ENSG00000117385|P3H1	2215.41	-0.150032	0.118868	-1.26218	0.206884	0.601047
ENSG00000164008|C1orf50	1223.77	0.0577062	0.154386	0.373778	0.708569	0.91707
ENSG00000283580	15.6445	0.121878	1.02662	0.118718	0.905499	0.976405
ENSG00000001460|STPG1	752.783	-0.0353542	0.183477	-0.19269	0.847202	0.960953
ENSG00000001461|NIPAL3	3434.32	0.0761211	0.118337	0.643259	0.520056	0.835017
ENSG00000117602|RCAN3	3545.08	0.242127	0.125755	1.92539	0.0541807	0.347215
ENSG00000184454|NCMAP	44.4228	-0.613999	0.700915	-0.875996	0.381032	0.75175
ENSG00000177606|JUN	34944.8	-0.157365	0.113353	-1.38827	0.165053	0.550122
ENSG00000116539|ASH1L	14529.5	0.213135	0.178282	1.19549	0.231895	0.629563
ENSG00000162923|WDR26	30191.3	0.211233	0.111765	1.88998	0.0587608	0.36028
ENSG00000084652|TXLNA	12523.2	-0.0169369	0.08965	-0.188922	0.850154	0.962025
ENSG00000160051|IQCC	723.281	0.273683	0.183458	1.49181	0.135749	0.511659
ENSG00000160055|TMEM234	574.848	0.0426703	0.186106	0.22928	0.818652	0.951533
ENSG00000183615|FAM167B	19.7923	0.156707	0.924242	0.169552	0.865363	0.966543
ENSG00000182866|LCK	38.8158	0.776233	0.645062	1.20335	0.228843	0.625621
ENSG00000116478|HDAC1	17428.6	-0.00807768	0.0931802	-0.0866888	0.930919	0.98148
ENSG00000175130|MARCKSL1	45487.2	-0.127277	0.0993811	-1.28069	0.200302	0.592117
ENSG00000162526|TSSK3	56.0359	0.236164	0.564748	0.418176	0.675819	0.904853
ENSG00000225828|FAM229A	311.783	-0.537865	0.26096	-2.06111	0.039293	0.300154
ENSG00000168679|SLC16A4	73.8303	0.111835	0.553798	0.201941	0.839963	0.959569
ENSG00000084623|EIF3I	42388.5	-0.17862	0.0969048	-1.84326	0.0652918	0.376037
ENSG00000134248|LAMTOR5	4296.45	-0.138732	0.123471	-1.1236	0.261184	0.658257
ENSG00000198492|YTHDF2	14485.5	0.0241978	0.0937298	0.258166	0.796279	0.94656
ENSG00000116329|OPRD1	17.9457	-0.698831	0.932403	-0.749495	0.453559	0.79795
ENSG00000253304|TMEM200B	7.90824	-0.481931	1.47143	-0.327525	0.743271	0.928115
ENSG00000116350|SRSF4	7821.38	-0.0645064	0.0956693	-0.674264	0.500143	0.827073
ENSG00000116353|MECR	1876.6	-0.0944824	0.126063	-0.749488	0.453563	0.79795
ENSG00000186205|MTARC1	7090.39	-0.00415079	0.0977312	-0.0424715	0.966123	0.992379
ENSG00000286231	9.69733	6.85482	2.6613	2.57574	0.0100026	0.14975
ENSG00000136630|HLX	54.7567	-0.0894221	0.604765	-0.147862	0.882451	0.970757
ENSG00000116141|MARK1	2288.81	0.31158	0.149639	2.08221	0.0373236	0.292899
ENSG00000162817|C1orf115	1467.29	0.119019	0.135224	0.880162	0.378771	0.750575
ENSG00000117593|DARS2	9555.11	0.0419856	0.106727	0.393395	0.694028	0.912658
ENSG00000185278|ZBTB37	3468.74	0.355262	0.178103	1.99471	0.046075	0.321622
ENSG00000135870|RC3H1	6628.54	0.234983	0.114661	2.04936	0.0404266	0.30433
ENSG00000197852|INKA2	133.919	0.667251	0.35503	1.87942	0.0601872	0.363892
ENSG00000171385|KCND3	1.48192	4.15386	4.60899	0.901252	0.367454	NA
ENSG00000276600|RAB7B	400.061	0.426334	0.229766	1.85551	0.0635236	0.371861
ENSG00000158769|F11R	22134.4	0.110031	0.0844687	1.30263	0.192701	0.584917
ENSG00000270149	61.8233	-0.919732	0.709618	-1.2961	0.194942	0.587208
ENSG00000215845|TSTD1	1641.5	-0.381531	0.148834	-2.56347	0.0103633	0.152585
ENSG00000158773|USF1	5773.95	-0.0370814	0.106978	-0.346625	0.728873	0.923558
ENSG00000186517|ARHGAP30	226.59	-0.383091	0.295547	-1.29621	0.194903	0.587208
ENSG00000143217|NECTIN4	1469.01	-0.311919	0.141283	-2.20776	0.0272612	0.250347
ENSG00000162755|KLHDC9	127.872	-0.0741836	0.378323	-0.196085	0.844543	0.960332
ENSG00000143256|PFDN2	6949.34	-0.0416519	0.12019	-0.346552	0.728928	0.923558
ENSG00000158793|NIT1	3003.34	-0.222605	0.12269	-1.81437	0.0696209	0.387429
ENSG00000158796|DEDD	5372.87	-0.0258866	0.0988026	-0.262003	0.793319	0.945611
ENSG00000196188|CTSE	2924.8	0.0688807	0.146081	0.471523	0.637267	0.889135
ENSG00000163050|COQ8A	3999.91	-0.0656456	0.104187	-0.630072	0.528648	0.840067
ENSG00000174574|AKIRIN1	20604.3	0.0142608	0.0868259	0.164246	0.869538	0.967655
ENSG00000168653|NDUFS5	15394.9	-0.156756	0.106047	-1.47818	0.139359	0.516205
ENSG00000288674	497.566	0.207177	0.362133	0.5721	0.567254	0.860105
ENSG00000121931|LRIF1	4583.31	0.173167	0.113496	1.52575	0.127072	0.497721
ENSG00000134255|CEPT1	2718.99	0.152885	0.11145	1.37179	0.170129	0.556789
ENSG00000162777|DENND2D	1408.04	0.048233	0.135254	0.356612	0.721382	0.920237
ENSG00000064886|CHI3L2	8.55087	0.927261	1.34535	0.689232	0.490678	0.822344
ENSG00000156171|DRAM2	2237.97	-0.0550355	0.119264	-0.461458	0.64447	0.8932
ENSG00000143515|ATP8B2	4388.68	0.222678	0.105867	2.10338	0.0354325	0.284917
ENSG00000160712|IL6R	1541.49	-0.135102	0.133059	-1.01535	0.309939	0.702525
ENSG00000169291|SHE	478.676	0.506314	0.212375	2.38406	0.0171228	0.19851
ENSG00000187980|PLA2G2C	0	NA	NA	NA	NA	NA
ENSG00000162543|UBXN10	2.42433	4.85293	3.87731	1.25163	0.210706	NA
ENSG00000143252|SDHC	10483.5	0.00511564	0.101695	0.0503036	0.95988	0.990878
ENSG00000143437|ARNT	7243.18	0.0984499	0.117235	0.839769	0.401038	0.768341
ENSG00000283324|CTXND2	20.0351	0.588468	0.990619	0.594041	0.552485	0.852496
ENSG00000143799|PARP1	55868.7	0.131758	0.0935367	1.40862	0.158947	0.543518
ENSG00000158864|NDUFS2	14575.9	-0.190392	0.0917869	-2.07428	0.0380532	0.2959
ENSG00000288636	0.525034	0.385295	4.97866	0.0773894	0.938314	NA
ENSG00000117450|PRDX1	62831.4	0.00298123	0.0897466	0.0332183	0.9735	0.994004
ENSG00000132780|NASP	28919.8	0.280306	0.0945315	2.96521	0.00302477	0.0716383
ENSG00000159588|CCDC17	64.1384	0.392882	0.499757	0.786147	0.431781	0.78601
ENSG00000159592|GPBP1L1	16195.2	0.0469318	0.0976066	0.480826	0.63064	0.886057
ENSG00000159596|TMEM69	4937.96	-0.0210263	0.107019	-0.196472	0.844241	0.960332
ENSG00000143570|SLC39A1	17703.5	0.0490249	0.095075	0.515644	0.606103	0.875992
ENSG00000203710|CR1	0	NA	NA	NA	NA	NA
ENSG00000143774|GUK1	9326.47	-0.208766	0.118153	-1.76691	0.0772434	0.402946
ENSG00000142864|SERBP1	84927.4	0.0611995	0.0935845	0.653949	0.513144	0.833106
ENSG00000143390|RFX5	8844.74	0.216743	0.0906723	2.3904	0.0168299	0.197115
ENSG00000198160|MIER1	6651.18	0.244032	0.128106	1.90492	0.05679	0.355913
ENSG00000162426|SLC45A1	146.066	0.0777415	0.339863	0.228744	0.819068	0.9518
ENSG00000117245|KIF17	135.403	-0.126077	0.370601	-0.340197	0.733708	0.924916
ENSG00000236334|PPIAL4G	3.55964	0.278782	1.98469	0.140467	0.888291	NA
ENSG00000085433|WDR47	1581.56	0.199094	0.142565	1.39652	0.162559	0.547942
ENSG00000188295|ZNF669	1202.65	0.178632	0.14399	1.24059	0.214758	0.61108
ENSG00000117155|SSX2IP	6596.45	0.179187	0.145765	1.22929	0.218964	0.615551
ENSG00000169905|TOR1AIP2	31736.2	0.178083	0.0888886	2.00344	0.0451301	0.319691
ENSG00000116750|UCHL5	12004	0.203182	0.109581	1.85417	0.0637143	0.372361
ENSG00000235169|SMIM1	232.597	-0.474609	0.296418	-1.60115	0.109344	0.466655
ENSG00000116514|RNF19B	1509.97	0.168642	0.147876	1.14042	0.25411	0.65093
ENSG00000143110|C1orf162	36.8758	0.171266	0.680894	0.251531	0.801403	0.946641
ENSG00000162419|GMEB1	2213.26	-0.101536	0.119886	-0.846942	0.397027	0.764132
ENSG00000130695|CEP85	2068.61	0.0715309	0.123759	0.577987	0.563273	0.85851
ENSG00000154222|CC2D1B	3704.02	-0.0568587	0.116096	-0.489754	0.624308	0.883431
ENSG00000173406|DAB1	88.0155	-0.35823	0.490721	-0.730007	0.465386	0.804095
ENSG00000197147|LRRC8B	7560.29	0.344693	0.140499	2.45334	0.0141536	0.181144
ENSG00000189195|BTBD8	754.645	0.272419	0.207557	1.3125	0.18935	0.580838
ENSG00000058673|ZC3H11A	26972.1	0.165793	0.113473	1.46108	0.143993	0.521623
ENSG00000163565|IFI16	4.74595	-5.55966	2.4587	-2.26122	0.0237457	NA
ENSG00000127074|RGS13	1.9759	4.56865	4.14251	1.10287	0.270084	NA
ENSG00000117152|RGS4	6.83863	-2.75381	1.84877	-1.48954	0.136346	0.511762
ENSG00000131236|CAP1	34788.5	-0.0170956	0.0839777	-0.203573	0.838687	0.959098
ENSG00000097021|ACOT7	9368.29	-0.0731843	0.105815	-0.691627	0.489171	0.821153
ENSG00000143337|TOR1AIP1	8080.25	0.22616	0.112912	2.00297	0.0451802	0.319691
ENSG00000081870|HSPB11	2265.44	0.244253	0.127353	1.91792	0.0551217	0.350283
ENSG00000078808|SDF4	26236.9	-0.146585	0.105679	-1.38707	0.16542	0.550634
ENSG00000133216|EPHB2	4296.54	0.0376641	0.102685	0.366792	0.713774	0.918164
ENSG00000143183|TMCO1	18560.6	-0.052665	0.0881496	-0.597451	0.550206	0.851528
ENSG00000142794|NBPF3	2107.75	0.159211	0.137223	1.16024	0.245953	0.642797
ENSG00000248333|CDK11B	20567.8	-0.110976	0.0956633	-1.16007	0.24602	0.642797
ENSG00000162390|ACOT11	1311.38	-0.00813355	0.150223	-0.054143	0.956821	0.990171
ENSG00000117448|AKR1A1	6883.57	-0.118938	0.118297	-1.00542	0.314695	0.704818
ENSG00000162687|KCNT2	578.02	0.699484	0.262112	2.66865	0.00761575	0.126671
ENSG00000143387|CTSK	516.306	-0.10374	0.212808	-0.487483	0.625916	0.884068
ENSG00000159023|EPB41	10239	0.0981485	0.0982021	0.999454	0.317575	0.707734
ENSG00000176256|HMGB4	0	NA	NA	NA	NA	NA
ENSG00000004455|AK2	26547	-0.117995	0.0860754	-1.37083	0.170428	0.556922
ENSG00000142920|AZIN2	114.581	-0.607061	0.491438	-1.23527	0.216728	0.613961
ENSG00000116525|TRIM62	1209.18	-0.0875116	0.145607	-0.601013	0.547832	0.850317
ENSG00000185888|PRSS38	0.740962	3.15816	4.86418	0.649268	0.516165	NA
ENSG00000163131|CTSS	513.488	0.108751	0.212342	0.512149	0.608547	0.876294
ENSG00000183814|LIN9	4343	0.22594	0.108579	2.08089	0.0374441	0.293064
ENSG00000274764|PRAMEF27	0.303042	1.81818	4.98036	0.365071	0.715059	NA
ENSG00000229571|PRAMEF25	0.465012	-2.20496	4.89008	-0.450904	0.652059	NA
ENSG00000275774|HNRNPCL2	0	NA	NA	NA	NA	NA
ENSG00000280267|PRAMEF26	0	NA	NA	NA	NA	NA
ENSG00000179412|HNRNPCL4	0.606083	2.84584	4.88317	0.582786	0.560038	NA
ENSG00000213516|RBMXL1	11292	-0.0771328	0.116886	-0.659899	0.509318	0.831002
ENSG00000117226|GBP3	897.142	0.0350772	0.181234	0.193547	0.846531	0.960872
ENSG00000117228|GBP1	6614.57	-0.066121	0.140195	-0.471635	0.637187	0.889101
ENSG00000162645|GBP2	7348.29	-0.224209	0.109945	-2.03928	0.0414221	0.308185
ENSG00000213512|GBP7	65.679	-0.21596	0.626778	-0.344556	0.730428	0.924145
ENSG00000162654|GBP4	3972.3	-0.210892	0.137557	-1.53313	0.125245	0.494682
ENSG00000126705|AHDC1	8635.49	-0.233275	0.0922627	-2.52838	0.0114591	0.160748
ENSG00000000938|FGR	4.76597	-0.484827	2.69887	-0.17964	0.857435	NA
ENSG00000126709|IFI6	991.484	0.132694	0.165504	0.801758	0.422693	0.779783
ENSG00000277058|HNRNPCL3	0.606083	2.84584	4.88317	0.582786	0.560038	NA
ENSG00000137959|IFI44L	2169.46	-0.040687	0.137083	-0.296805	0.766616	0.936144
ENSG00000174151|CYB561D1	1435	-0.381688	0.147955	-2.57976	0.00988693	0.148967
ENSG00000181754|AMIGO1	975.239	0.199498	0.158365	1.25973	0.207765	0.602395
ENSG00000156097|GPR61	55.5887	1.2292	0.548946	2.2392	0.0251426	0.23961
ENSG00000065135|GNAI3	19161.3	0.0902807	0.0885276	1.0198	0.307822	0.701182
ENSG00000168765|GSTM4	2871.62	-0.259792	0.125949	-2.06268	0.0391431	0.299723
ENSG00000134183|GNAT2	70.0391	-0.0465645	0.484197	-0.0961685	0.923387	0.980243
ENSG00000073756|PTGS2	127.179	0.255113	0.36322	0.702363	0.482453	0.817458
ENSG00000153904|DDAH1	18158.4	0.165272	0.100303	1.64773	0.0994079	0.44823
ENSG00000155380|SLC16A1	10142.2	0.115157	0.0964499	1.19395	0.232496	0.629915
ENSG00000134259|NGF	13.4511	1.57049	1.11332	1.41063	0.158354	0.543335
ENSG00000188976|NOC2L	54875.3	-0.0941215	0.0976176	-0.964185	0.334953	0.718083
ENSG00000187961|KLHL17	1490.61	-0.0668239	0.155292	-0.430312	0.666969	0.901387
ENSG00000187583|PLEKHN1	366.059	0.071922	0.227411	0.316264	0.751802	0.931642
ENSG00000187642|PERM1	62.542	-0.987143	0.52633	-1.87552	0.0607209	0.365877
ENSG00000188290|HES4	3169.34	-0.284475	0.150193	-1.89406	0.0582167	0.358959
ENSG00000187608|ISG15	1845.75	-0.0628113	0.159187	-0.394575	0.693157	0.912295
ENSG00000188157|AGRN	180794	-0.239684	0.0836997	-2.86362	0.00418832	0.088015
ENSG00000256407	0.606083	2.84584	4.88317	0.582786	0.560038	NA
ENSG00000157211|CDCP2	3.4744	2.75672	2.98339	0.924022	0.355475	NA
ENSG00000116221|MRPL37	12428.4	-0.0556399	0.0950013	-0.585675	0.558094	0.855892
ENSG00000157216|SSBP3	7482.29	-0.284422	0.093818	-3.03163	0.00243235	0.0622014
ENSG00000117601|SERPINC1	13.6567	-0.585463	1.58993	-0.368231	0.712701	0.918164
ENSG00000135775|COG2	6787.56	-0.0971614	0.0950866	-1.02182	0.306866	0.699804
ENSG00000135773|CAPN9	320.842	-0.159474	0.245208	-0.650361	0.515459	0.833442
ENSG00000119280|C1orf198	5712.02	0.029231	0.0970068	0.301329	0.763164	0.934945
ENSG00000135744|AGT	82.9103	0.943035	0.67303	1.40118	0.16116	0.545358
ENSG00000137965|IFI44	1899.07	0.256589	0.122212	2.09954	0.0357691	0.286606
ENSG00000163239|TDRD10	54.4092	0.650704	0.55045	1.18213	0.237153	0.634128
ENSG00000160714|UBE2Q1	13776.1	0.033222	0.0897719	0.370071	0.71133	0.918164
ENSG00000160716|CHRNB2	104.616	-0.181227	0.405353	-0.447085	0.654814	0.898066
ENSG00000160710|ADAR	47000.8	0.190777	0.107924	1.7677	0.0771105	0.402946
ENSG00000123472|ATPAF1	7170.53	-0.116984	0.098265	-1.19049	0.233852	0.631293
ENSG00000186118|TEX38	7.03985	-0.677929	1.90227	-0.35638	0.721556	0.920237
ENSG00000159658|EFCAB14	12584	0.137	0.128165	1.06893	0.285099	0.680048
ENSG00000142973|CYP4B1	559.434	-0.377405	0.195383	-1.93161	0.0534072	0.345574
ENSG00000143801|PSEN2	1631.27	-0.06952	0.142178	-0.488964	0.624868	0.883685
ENSG00000132185|FCRLA	0	NA	NA	NA	NA	NA
ENSG00000162746|FCRLB	5.77512	-1.51786	2.04884	-0.740836	0.458793	0.800292
ENSG00000081721|DUSP12	2954.04	-0.210229	0.118267	-1.77759	0.075472	0.400282
ENSG00000082512|TRAF5	1419.57	0.569922	0.135851	4.1952	2.72625e-05	0.00228863
ENSG00000170385|SLC30A1	5828.18	0.100474	0.122142	0.822601	0.410735	0.774987
ENSG00000198570|RD3	133.867	0.275968	0.365138	0.755792	0.449774	0.795376
ENSG00000118217|ATF6	9616.07	0.0431991	0.117598	0.367344	0.713363	0.918164
ENSG00000117054|ACADM	4949.86	0.184716	0.102443	1.80311	0.0713715	0.392008
ENSG00000137955|RABGGTB	7450.02	0.051647	0.0924245	0.558802	0.576297	0.864469
ENSG00000057468|MSH4	1.72891	4.37612	4.34997	1.00601	0.314409	NA
ENSG00000213047|DENND1B	2341.54	0.366514	0.202637	1.80872	0.0704945	0.389568
ENSG00000134376|CRB1	11.1946	-0.26147	1.16607	-0.224233	0.822576	0.953836
ENSG00000117400|MPL	73.1689	-0.210834	0.473596	-0.445178	0.656191	0.898111
ENSG00000117399|CDC20	18222.4	-0.604172	0.103298	-5.84882	4.95068e-09	1.76398e-06
ENSG00000066322|ELOVL1	4799.86	-0.262706	0.115918	-2.26632	0.023432	0.231348
ENSG00000159479|MED8	4264.26	-0.118283	0.106394	-1.11175	0.266247	0.663919
ENSG00000116337|AMPD2	6091.15	-0.149208	0.104448	-1.42854	0.153136	0.535059
ENSG00000066279|ASPM	21904.3	0.140164	0.404603	0.346423	0.729025	0.923564
ENSG00000117020|AKT3	153.606	0.192845	0.33579	0.574303	0.565763	0.859343
ENSG00000198912|C1orf174	5244.06	-0.105438	0.100923	-1.04474	0.296144	0.692182
ENSG00000116604|MEF2D	6878.02	-0.133962	0.0989834	-1.35338	0.175933	0.563898
ENSG00000183856|IQGAP3	10847.3	-0.0463127	0.0949689	-0.487662	0.625789	0.884045
ENSG00000163382|NAXE	11000.8	-0.226533	0.0992865	-2.28161	0.0225123	0.227164
ENSG00000160818|GPATCH4	10236.4	0.00361823	0.107161	0.0337645	0.973065	0.994004
ENSG00000132702|HAPLN2	3.31662	0.513354	2.00777	0.255683	0.798195	NA
ENSG00000132692|BCAN	2.62997	-0.160655	3.20208	-0.0501722	0.959985	NA
ENSG00000132688|NES	644.72	0.736807	0.226413	3.25427	0.00113685	0.0378151
ENSG00000143320|CRABP2	16061.3	-0.553367	0.0993762	-5.56841	2.57079e-08	7.49455e-06
ENSG00000143319|ISG20L2	17263.6	-0.0299016	0.0890747	-0.335692	0.737103	0.925918
ENSG00000143303|RRNAD1	2500.71	-0.234153	0.137377	-1.70445	0.0882962	0.427871
ENSG00000143314|MRPL24	7175.34	-0.185058	0.121902	-1.51809	0.128992	0.500909
ENSG00000143321|HDGF	74374.3	-0.0933895	0.0875435	-1.06678	0.286072	0.680775
ENSG00000143294|PRCC	12650.2	-0.0645489	0.0923236	-0.69916	0.484452	0.818967
ENSG00000027869|SH2D2A	136.326	0.11668	0.348087	0.335203	0.737472	0.926065
ENSG00000204006|C1orf185	6.84621	-1.17702	1.92455	-0.611585	0.540813	0.84662
ENSG00000123091|RNF11	10797.4	0.154053	0.107636	1.43124	0.152361	0.535021
ENSG00000085832|EPS15	7110.71	0.158896	0.137278	1.15747	0.247079	0.64386
ENSG00000237330|RNF223	102.816	-0.168836	0.472246	-0.357518	0.720704	0.920039
ENSG00000131591|C1orf159	5372.43	-0.172871	0.129137	-1.33866	0.180682	0.56981
ENSG00000085831|TTC39A	957	0.351221	0.16555	2.12154	0.0338764	0.277555
ENSG00000187634|SAMD11	989.022	-0.513764	0.165997	-3.09501	0.00196806	0.0544274
ENSG00000156875|MFSD14A	6187.65	0.187435	0.16975	1.10418	0.269515	0.667352
ENSG00000156876|SASS6	4089.11	0.402783	0.15502	2.59827	0.00936954	0.145011
ENSG00000122435|TRMT13	4009.42	0.179908	0.119125	1.51025	0.130981	0.503968
ENSG00000122477|LRRC39	136.651	-0.192958	0.402611	-0.479266	0.631749	0.886724
ENSG00000137992|DBT	5973.28	0.0782598	0.122573	0.638473	0.523166	0.837067
ENSG00000137996|RTCA	5459.04	-0.0856204	0.09765	-0.876809	0.38059	0.751332
ENSG00000137948|BRDT	7.53224	6.49477	2.13848	3.0371	0.00238867	0.0613186
ENSG00000121774|KHDRBS1	33617.4	0.0532717	0.0947485	0.562243	0.573951	0.863543
ENSG00000121775|TMEM39B	2488.1	0.00595745	0.117432	0.0507312	0.95954	0.990834
ENSG00000025800|KPNA6	17544.1	-0.0529947	0.0861532	-0.615122	0.538474	0.84526
ENSG00000160050|CCDC28B	406.757	0.140233	0.216505	0.64771	0.517173	0.833876
ENSG00000064703|DDX20	3912.92	0.136607	0.109011	1.25315	0.210153	0.606041
ENSG00000122406|RPL5	98297.3	-0.105251	0.0901234	-1.16786	0.242863	0.638495
ENSG00000154511|DIPK1A	1191.89	0.202652	0.140238	1.44506	0.148442	0.52851
ENSG00000143033|MTF2	6077.62	0.214769	0.116848	1.83801	0.0660608	0.378292
ENSG00000189410|SH2D5	41.8161	-0.286336	0.633008	-0.452341	0.651023	0.895706
ENSG00000127483|HP1BP3	21936.9	0.220879	0.0906627	2.43627	0.0148396	0.184096
ENSG00000117298|ECE1	14120.8	-0.093521	0.0871406	-1.07322	0.283172	0.678767
ENSG00000143502|SUSD4	5580.84	-0.28509	0.105619	-2.69923	0.00694991	0.121549
ENSG00000178395|CCDC185	49.4939	1.17607	0.578012	2.03469	0.0418823	0.309324
ENSG00000162620|LRRIQ3	201.988	0.0552167	0.314258	0.175705	0.860526	0.964355
ENSG00000116783|TNNI3K	13.9054	-2.22791	1.18915	-1.87353	0.0609957	0.366569
ENSG00000162621|LRRC53	0	NA	NA	NA	NA	NA
ENSG00000178965|ERICH3	14.2521	0.215644	1.08925	0.197974	0.843065	0.960127
ENSG00000116791|CRYZ	4364.81	0.02211	0.104897	0.210779	0.83306	0.957237
ENSG00000162623|TYW3	4231.88	0.00955077	0.110135	0.086719	0.930895	0.98148
ENSG00000259030|FPGT-TNNI3K	226.68	-0.0741954	0.275126	-0.269678	0.787408	0.943517
ENSG00000154358|OBSCN	6132.86	0.0763216	0.136246	0.560173	0.575361	0.864047
ENSG00000263464|PPIAL4C	6.87182	0.0151335	1.52694	0.00991102	0.992092	0.999385
ENSG00000203814|H2BC18	1184.28	-0.672556	0.142077	-4.73376	2.20402e-06	0.000296968
ENSG00000183598|H3C13	49.4996	-0.765546	0.58274	-1.3137	0.188947	0.580267
ENSG00000270882|H4C14	2659.89	-0.0763885	0.114774	-0.665553	0.505697	0.829582
ENSG00000203811|H3C14	677.472	-0.367115	0.190823	-1.92385	0.0543732	0.347754
ENSG00000203812|H2AC18	2645.46	-0.958595	0.133128	-7.20055	5.99681e-13	6.41019e-10
ENSG00000272196|H2AC19	2773.94	-0.93838	0.132956	-7.05783	1.69128e-12	1.58618e-09
ENSG00000203852|H3C15	675.32	-0.394565	0.194675	-2.02679	0.042684	0.313185
ENSG00000270276|H4C15	2692.33	-0.0766128	0.11633	-0.658581	0.510165	0.831383
ENSG00000184678|H2BC21	6751.15	-0.950129	0.123857	-7.67115	1.70464e-14	2.63604e-11
ENSG00000184260|H2AC20	354.237	-0.874554	0.236416	-3.69922	0.000216262	0.0118346
ENSG00000184270|H2AC21	105.197	-0.923358	0.430356	-2.14557	0.0319075	0.269842
ENSG00000178096|BOLA1	564.887	-1.1217	0.208985	-5.36737	7.98921e-08	2.06611e-05
ENSG00000159164|SV2A	4926.43	0.357469	0.101332	3.52768	0.000419211	0.0188779
ENSG00000143368|SF3B4	23635.4	-0.123144	0.106756	-1.15351	0.248703	0.64512
ENSG00000150337|FCGR1A	66.3515	-1.36108	0.516374	-2.63584	0.00839282	0.13457
ENSG00000170128|GPR25	0.909125	3.43471	4.85042	0.708126	0.478867	NA
ENSG00000163362|INAVA	4073.25	-0.0643158	0.107389	-0.598903	0.549237	0.850839
ENSG00000116852|KIF21B	690.956	0.130265	0.180576	0.721387	0.470672	0.808782
ENSG00000116857|TMEM9	8443.66	-0.246067	0.104729	-2.34956	0.0187954	0.209546
ENSG00000163395|IGFN1	108.961	1.11786	0.504871	2.21416	0.0268179	0.247742
ENSG00000081248|CACNA1S	21.1057	1.60714	0.876812	1.83293	0.0668129	0.38002
ENSG00000203943|SAMD13	355.728	-0.477837	0.22746	-2.10075	0.0356625	0.285907
ENSG00000174529|TMEM81	390.828	-0.154306	0.228247	-0.676047	0.49901	0.826842
ENSG00000116984|MTR	13017.6	0.29689	0.138136	2.14926	0.0316136	0.269051
ENSG00000143742|SRP9	25492.4	0.0270995	0.0868293	0.3121	0.754964	0.93272
ENSG00000196187|TMEM63A	1923.25	0.183247	0.123571	1.48293	0.138093	0.513855
ENSG00000243709|LEFTY1	9.78512	-0.124576	1.85639	-0.0671068	0.946497	0.986764
ENSG00000255835	3.6365	5.43838	3.40231	1.59844	0.109945	NA
ENSG00000143811|PYCR2	7553.7	-0.0333337	0.102879	-0.324009	0.745931	0.929651
ENSG00000143768|LEFTY2	3.25508	-5.01434	3.52929	-1.42078	0.155381	NA
ENSG00000143819|EPHX1	12986.5	-0.291188	0.0974632	-2.98767	0.00281115	0.06865
ENSG00000120948|TARDBP	32037.2	0.125444	0.0899972	1.39387	0.163357	0.548309
ENSG00000009724|MASP2	433.07	-0.231608	0.207558	-1.11587	0.264477	0.662183
ENSG00000116649|SRM	12869.7	-0.113368	0.11578	-0.979164	0.327499	0.713086
ENSG00000171824|EXOSC10	20940.8	-0.00636839	0.0857962	-0.0742269	0.94083	0.984641
ENSG00000117614|SYF2	4373.29	-0.0424217	0.10324	-0.410904	0.681143	0.906769
ENSG00000117616|RSRP1	3564.97	0.14383	0.118175	1.21709	0.22357	0.621484
ENSG00000187010|RHD	73.2829	0.605986	0.475614	1.27411	0.202624	0.595962
ENSG00000183726|TMEM50A	5246.45	-0.0611034	0.10379	-0.588723	0.556047	0.854154
ENSG00000188672|RHCE	64.3391	-0.619415	0.511024	-1.2121	0.225473	0.622457
ENSG00000204178|MACO1	1958.45	0.0340046	0.121157	0.280665	0.778967	0.941005
ENSG00000198860|TSEN15	6032.54	-0.0148568	0.0964023	-0.154113	0.877521	0.969166
ENSG00000160838|LRRC71	41.5243	-0.0257479	0.626582	-0.0410926	0.967222	0.99254
ENSG00000198400|NTRK1	10.6667	-1.04388	1.668	-0.625823	0.531431	0.842159
ENSG00000155816|FMN2	6.41413	-0.320093	2.06931	-0.154686	0.877069	0.969074
ENSG00000180875|GREM2	7.27236	-0.753949	1.87999	-0.401038	0.688392	0.910775
ENSG00000134684|YARS1	16675.9	-0.0972288	0.093339	-1.04167	0.297562	0.693512
ENSG00000125944|HNRNPR	13363.9	0.124624	0.103743	1.20128	0.229644	0.627277
ENSG00000143382|ADAMTSL4	113.013	-0.195887	0.402397	-0.4868	0.6264	0.884207
ENSG00000184007|PTP4A2	28749	-0.0377689	0.0892101	-0.42337	0.672025	0.903253
ENSG00000288678	1.00453	0.272598	3.35862	0.0811638	0.935312	NA
ENSG00000116580|GON4L	20733.1	0.014583	0.0986537	0.14782	0.882485	0.970757
ENSG00000176092|CRYBG2	662.965	0.0611998	0.181235	0.337681	0.735603	0.925422
ENSG00000137942|FNBP1L	15642.6	0.206948	0.152511	1.35694	0.1748	0.562671
ENSG00000157077|ZFYVE9	4328.34	0.149439	0.129758	1.15168	0.249455	0.645527
ENSG00000162493|PDPN	4.05895	-5.33422	2.59977	-2.05181	0.0401885	NA
ENSG00000162542|TMCO4	1516.86	-0.265014	0.131389	-2.01702	0.0436939	0.315442
ENSG00000178922|HYI	61.5066	-0.00921971	0.582563	-0.0158261	0.987373	0.997329
ENSG00000121753|ADGRB2	3211.31	-0.144808	0.10831	-1.33697	0.181232	0.570225
ENSG00000162631|NTNG1	2053.41	-0.0562493	0.123387	-0.455878	0.648478	0.895225
ENSG00000163374|YY1AP1	9727.37	0.0191482	0.090619	0.211305	0.832649	0.957237
ENSG00000235098|ANKRD65	20.9173	1.10962	0.967906	1.14641	0.251624	0.647806
ENSG00000143740|SNAP47	5720.49	-0.05317	0.10226	-0.519949	0.603099	0.875201
ENSG00000117411|B4GALT2	7725.21	-0.176688	0.10673	-1.65548	0.0978279	0.443601
ENSG00000162745|OLFML2B	64.1034	0.387005	0.54891	0.705043	0.480784	0.815669
ENSG00000187862|TTC24	41.0336	0.175239	0.629232	0.278496	0.780632	0.941351
ENSG00000162891|IL20	0	NA	NA	NA	NA	NA
ENSG00000204518|AADACL4	0	NA	NA	NA	NA	NA
ENSG00000137976|DNASE2B	0	NA	NA	NA	NA	NA
ENSG00000203663|OR2L2	15.109	0.11324	1.03987	0.108898	0.913283	0.97813
ENSG00000198128|OR2L3	0	NA	NA	NA	NA	NA
ENSG00000171180|OR2M4	0	NA	NA	NA	NA	NA
ENSG00000186501|TMEM222	2655.99	-0.12111	0.141489	-0.855966	0.392016	0.759601
ENSG00000133067|LGR6	68.9847	-0.607581	0.589258	-1.03109	0.302497	0.697082
ENSG00000185090|MANEAL	469.012	0.106123	0.203305	0.521989	0.601678	0.874408
ENSG00000157873|TNFRSF14	24.1217	0.152772	0.828582	0.184378	0.853717	0.962918
ENSG00000204505|PRAMEF9	0	NA	NA	NA	NA	NA
ENSG00000284733|OR4F29	1.17047	-0.429942	3.59427	-0.119619	0.904785	NA
ENSG00000081019|RSBN1	2698.91	0.0414088	0.157349	0.263165	0.792424	0.945558
ENSG00000180667|YOD1	7181.05	0.298288	0.133116	2.24081	0.0250383	0.239251
ENSG00000177151|OR2T35	0	NA	NA	NA	NA	NA
ENSG00000180708|OR10K2	0	NA	NA	NA	NA	NA
ENSG00000168264|IRF2BP2	18506.7	-0.194447	0.0914537	-2.12618	0.0334886	0.27626
ENSG00000162775|RBM15	3103.43	0.48285	0.168193	2.8708	0.00409428	0.0868356
ENSG00000053371|AKR7A2	2373.73	0.0423056	0.11944	0.3542	0.723189	0.921432
ENSG00000081692|JMJD4	2814.6	-0.26751	0.139592	-1.91637	0.055318	0.35058
ENSG00000179023|KLHDC7A	0	NA	NA	NA	NA	NA
ENSG00000173171|MTX1	5672.09	-0.136632	0.115432	-1.18366	0.236547	0.633699
ENSG00000132128|LRRC41	5553.82	-0.204162	0.116325	-1.7551	0.0792422	0.408281
ENSG00000143862|ARL8A	4421.11	0.0979484	0.120264	0.814445	0.41539	0.77602
ENSG00000170075|GPR37L1	86.0471	0.605772	0.510925	1.18564	0.235766	0.633078
ENSG00000143376|SNX27	10271.9	0.122107	0.0994874	1.22736	0.219687	0.616245
ENSG00000159409|CELF3	50.095	-0.397692	0.592328	-0.671405	0.501963	0.828309
ENSG00000178796|RIIAD1	1.33196	-3.72719	4.82132	-0.773064	0.439484	NA
ENSG00000143436|MRPL9	10257.6	-0.0592823	0.111919	-0.529692	0.596326	0.872557
ENSG00000143450|OAZ3	205.687	-0.162615	0.307655	-0.528562	0.597109	0.872724
ENSG00000182134|TDRKH	4624.66	0.0267454	0.10866	0.246139	0.805575	0.948006
ENSG00000213171|LINGO4	1.39504	-3.79176	4.74173	-0.799657	0.42391	NA
ENSG00000143365|RORC	63.5871	-1.13055	0.521318	-2.16863	0.0301109	0.262248
ENSG00000225556|C2CD4D	51.342	-0.151316	0.556932	-0.271695	0.785857	0.943146
ENSG00000196407|THEM5	40.2131	0.297524	0.690665	0.430779	0.666629	0.901387
ENSG00000159445|THEM4	5984.89	-0.00295784	0.0963348	-0.0307037	0.975506	0.994863
ENSG00000197747|S100A10	49427.2	-0.116813	0.108359	-1.07802	0.281025	0.676667
ENSG00000123473|STIL	7272.53	0.177211	0.150507	1.17743	0.239025	0.635449
ENSG00000198854|C1orf68	0	NA	NA	NA	NA	NA
ENSG00000203786|KPRP	0.909125	3.43471	4.85042	0.708126	0.478867	NA
ENSG00000240386|LCE1F	0	NA	NA	NA	NA	NA
ENSG00000186226|LCE1E	0	NA	NA	NA	NA	NA
ENSG00000172155|LCE1D	0	NA	NA	NA	NA	NA
ENSG00000020129|NCDN	8037.62	-0.201549	0.110019	-1.83196	0.0669577	0.380131
ENSG00000116819|TFAP2E	289.455	-0.199667	0.25589	-0.780283	0.435224	0.787885
ENSG00000237763|AMY1A	283.408	-0.318464	0.296505	-1.07406	0.282797	0.678419
ENSG00000174876|AMY1B	147.317	-0.158201	0.33583	-0.471074	0.637588	0.889351
ENSG00000187733|AMY1C	273.976	-0.40432	0.308207	-1.31185	0.189572	0.580991
ENSG00000186603|HPDL	142.499	-0.026809	0.353131	-0.075918	0.939484	0.984174
ENSG00000197454|OR2L5	0	NA	NA	NA	NA	NA
ENSG00000117643|MAN1C1	26.6884	-0.262098	0.769091	-0.34079	0.733262	0.924818
ENSG00000162430|SELENON	12596.1	0.0915812	0.0909994	1.00639	0.314226	0.704818
ENSG00000173212|MAB21L3	924.519	0.349102	0.209074	1.66976	0.0949672	0.439465
ENSG00000163531|NFASC	2943.44	0.310474	0.121152	2.56269	0.0103865	0.152632
ENSG00000184144|CNTN2	105.737	0.924794	0.405041	2.28321	0.022418	0.226639
ENSG00000143028|SYPL2	11.3636	-0.480635	1.21705	-0.394917	0.692904	0.912266
ENSG00000154429|CCSAP	6009.21	0.149974	0.118629	1.26423	0.206148	0.599777
ENSG00000143632|ACTA1	13.7692	0.595031	1.09814	0.541855	0.587918	0.868499
ENSG00000187815|ZFP69	147.049	0.892848	0.365728	2.44129	0.014635	0.18347
ENSG00000117010|ZNF684	781.122	0.312233	0.167506	1.86401	0.0623204	0.370427
ENSG00000164002|EXO5	240.028	0.41566	0.281585	1.47614	0.139906	0.517033
ENSG00000180098|TRNAU1AP	2350.98	-0.0454139	0.121712	-0.373127	0.709054	0.917296
ENSG00000120656|TAF12	4196.2	0.00595004	0.109901	0.0541398	0.956824	0.990171
ENSG00000188060|RAB42	290.925	0.533149	0.250763	2.12611	0.0334944	0.27626
ENSG00000240038|AMY2B	195.673	-0.339882	0.366333	-0.927796	0.353513	0.735618
ENSG00000243480|AMY2A	15.1698	-1.36841	1.4973	-0.913915	0.360762	0.739096
ENSG00000117266|CDK18	4863.88	-0.131465	0.103865	-1.26572	0.205612	0.59887
ENSG00000170498|KISS1	43.7743	-0.271712	0.621125	-0.437452	0.661784	0.89954
ENSG00000174567|GOLT1A	392.497	-0.236255	0.262131	-0.901287	0.367436	0.743309
ENSG00000143850|PLEKHA6	3606.95	0.186131	0.136256	1.36604	0.171925	0.559384
ENSG00000158615|PPP1R15B	19260.2	0.152246	0.107209	1.42009	0.155581	0.538957
ENSG00000133056|PIK3C2B	5644.34	-0.0803563	0.109553	-0.733495	0.463257	0.802449
ENSG00000198625|MDM4	8921.19	0.119467	0.0939134	1.2721	0.203337	0.596681
ENSG00000143776|CDC42BPA	13225.5	0.162211	0.153566	1.0563	0.290833	0.686538
ENSG00000197056|ZMYM1	9083.98	0.19362	0.131727	1.46986	0.1416	0.519644
ENSG00000116560|SFPQ	56582.7	-0.0487086	0.0943969	-0.515998	0.605856	0.875872
ENSG00000203910|C1orf146	4.51676	-1.00553	2.28493	-0.440071	0.659885	NA
ENSG00000174842|GLMN	2053.62	0.077279	0.121996	0.633455	0.526436	0.83897
ENSG00000122484|RPAP2	5208.64	0.204086	0.13707	1.48892	0.136509	0.511762
ENSG00000162676|GFI1	80.5172	-0.176385	0.454495	-0.38809	0.69795	0.913495
ENSG00000067208|EVI5	2369.38	0.251866	0.136555	1.84442	0.0651212	0.37573
ENSG00000279111|OR10X1	0	NA	NA	NA	NA	NA
ENSG00000187701|OR2T27	0	NA	NA	NA	NA	NA
ENSG00000203757|OR6K3	0	NA	NA	NA	NA	NA
ENSG00000188340|OR6N2	0	NA	NA	NA	NA	NA
ENSG00000163563|MNDA	0	NA	NA	NA	NA	NA
ENSG00000196772|OR14A16	0	NA	NA	NA	NA	NA
ENSG00000197591|OR11L1	0	NA	NA	NA	NA	NA
ENSG00000162722|TRIM58	3.92106	-5.28286	2.71432	-1.94629	0.0516193	NA
ENSG00000238243|OR2W3	0	NA	NA	NA	NA	NA
ENSG00000177275|OR2AJ1	0	NA	NA	NA	NA	NA
ENSG00000279263|OR2L8	0	NA	NA	NA	NA	NA
ENSG00000132781|MUTYH	2176.11	-0.158311	0.155889	-1.01554	0.309851	0.702525
ENSG00000197532|OR6Y1	0	NA	NA	NA	NA	NA
ENSG00000121903|ZSCAN20	1845.78	-0.126416	0.14271	-0.885821	0.375714	0.74872
ENSG00000198104|OR2T6	0.246987	1.66898	4.99008	0.33446	0.738032	NA
ENSG00000162727|OR2M5	0	NA	NA	NA	NA	NA
ENSG00000198601|OR2M2	0	NA	NA	NA	NA	NA
ENSG00000117523|PRRC2C	64040.1	0.17684	0.134343	1.31634	0.188062	0.579435
ENSG00000283683|MYOCOS	9.11709	-1.03059	1.28411	-0.802565	0.422226	0.779783
ENSG00000034971|MYOC	3.5343	1.11559	2.94095	0.37933	0.704443	NA
ENSG00000187730|GABRD	6.38068	1.04054	1.95579	0.532031	0.594705	0.87216
ENSG00000142609|CFAP74	291.927	0.0322808	0.262729	0.122868	0.902212	0.975028
ENSG00000116809|ZBTB17	5981.5	-0.104156	0.11763	-0.885456	0.375911	0.74874
ENSG00000183888|SRARP	0	NA	NA	NA	NA	NA
ENSG00000173641|HSPB7	100.62	0.119454	0.422754	0.282561	0.777513	0.940678
ENSG00000186510|CLCNKA	368.153	0.123848	0.224882	0.550724	0.581823	0.86652
ENSG00000185519|FAM131C	529.855	-0.0614048	0.205849	-0.2983	0.765474	0.936144
ENSG00000184908|CLCNKB	482.801	0.139026	0.20734	0.670523	0.502524	0.828347
ENSG00000116785|CFHR3	91.6443	0.592145	0.422063	1.40298	0.160624	0.54449
ENSG00000244414|CFHR1	27.1018	-0.736966	1.38311	-0.53283	0.594151	0.87216
ENSG00000134365|CFHR4	0	NA	NA	NA	NA	NA
ENSG00000177462|OR2T8	0	NA	NA	NA	NA	NA
ENSG00000142634|EFHD2	9057.06	0.0269158	0.0947816	0.283977	0.776428	0.940508
ENSG00000162438|CTRC	12.5553	-1.31716	1.19403	-1.10312	0.269974	0.667515
ENSG00000142621|FHAD1	798.414	-0.15793	0.17932	-0.880715	0.378472	0.750575
ENSG00000169214|OR6F1	0	NA	NA	NA	NA	NA
ENSG00000239395	0	NA	NA	NA	NA	NA
ENSG00000241128|OR14A2	0	NA	NA	NA	NA	NA
ENSG00000153230|OR14K1	0	NA	NA	NA	NA	NA
ENSG00000173285|OR10K1	0	NA	NA	NA	NA	NA
ENSG00000177201|OR2T12	0.909125	3.43471	4.85042	0.708126	0.478867	NA
ENSG00000177212|OR2T33	0	NA	NA	NA	NA	NA
ENSG00000160062|ZBTB8A	1064.18	0.259098	0.150983	1.71607	0.0861493	0.42268
ENSG00000176261|ZBTB8OS	3017.07	-0.0705481	0.123444	-0.571498	0.567662	0.860382
ENSG00000177535|OR2B11	0	NA	NA	NA	NA	NA
ENSG00000213281|NRAS	17568.1	0.160348	0.117641	1.36303	0.172872	0.560533
ENSG00000009307|CSDE1	101348	0.121184	0.106349	1.13949	0.254499	0.651234
ENSG00000052723|SIKE1	9975.42	0.243896	0.112323	2.17139	0.0299016	0.261419
ENSG00000180433|OR6K6	0	NA	NA	NA	NA	NA
ENSG00000182783|OR2T29	0	NA	NA	NA	NA	NA
ENSG00000186092|OR4F5	0	NA	NA	NA	NA	NA
ENSG00000188558|OR2G6	0	NA	NA	NA	NA	NA
ENSG00000077522|ACTN2	13.5895	1.61837	1.5531	1.04203	0.2974	0.693512
ENSG00000196240|OR2T2	0	NA	NA	NA	NA	NA
ENSG00000197437|OR13G1	0	NA	NA	NA	NA	NA
ENSG00000221888|OR1C1	0	NA	NA	NA	NA	NA
ENSG00000228198|OR2M3	0	NA	NA	NA	NA	NA
ENSG00000184022|OR2T10	0	NA	NA	NA	NA	NA
ENSG00000197403|OR6N1	0	NA	NA	NA	NA	NA
ENSG00000279301|OR2T11	0	NA	NA	NA	NA	NA
ENSG00000198967|OR10Z1	0	NA	NA	NA	NA	NA
ENSG00000163554|SPTA1	1.48192	4.15386	4.60899	0.901252	0.367454	NA
ENSG00000198965|OR10R2	0	NA	NA	NA	NA	NA
ENSG00000050628|PTGER3	1406.88	0.39579	0.188925	2.09496	0.0361749	0.287855
ENSG00000132485|ZRANB2	11611.4	0.0739801	0.0941502	0.785766	0.432004	0.786111
ENSG00000143379|SETDB1	9600.63	-0.0928377	0.0904023	-1.02694	0.304449	0.698937
ENSG00000143418|CERS2	26100.6	0.103637	0.09381	1.10476	0.269264	0.667352
ENSG00000143412|ANXA9	1798.42	-0.11486	0.138094	-0.831747	0.405552	0.772455
ENSG00000143363|PRUNE1	8979	0.0620412	0.0962866	0.644339	0.519356	0.834726
ENSG00000163141|BNIPL	130.489	-0.270906	0.390758	-0.693283	0.488132	0.82104
ENSG00000143443|C1orf56	1885.89	-0.309406	0.124732	-2.48057	0.0131173	0.172113
ENSG00000197622|CDC42SE1	22505.5	-0.0824598	0.0889457	-0.92708	0.353885	0.73574
ENSG00000213190|MLLT11	2405.94	0.0882695	0.118986	0.741847	0.45818	0.800007
ENSG00000143409|MINDY1	1931.69	-0.0558587	0.124308	-0.449355	0.653175	0.896662
ENSG00000162783|IER5	4506.37	-0.011621	0.122254	-0.0950567	0.92427	0.98092
ENSG00000153029|MR1	1056.33	0.249885	0.157966	1.58189	0.113674	0.472311
ENSG00000160785|SLC25A44	12473	-0.0133182	0.0891588	-0.149376	0.881257	0.970757
ENSG00000091483|FH	12162.9	-0.126867	0.0978035	-1.29716	0.194577	0.587144
ENSG00000117009|KMO	33.0127	0.712772	0.705938	1.00968	0.312648	0.704168
ENSG00000054277|OPN3	1113.05	-0.0108356	0.149641	-0.0724103	0.942275	0.985113
ENSG00000203668|CHML	10713.7	0.344254	0.190236	1.80961	0.0703559	0.38913
ENSG00000054523|KIF1B	64037	0.0885715	0.152005	0.582689	0.560103	0.856803
ENSG00000197785|ATAD3A	18128	-0.121693	0.111797	-1.08852	0.276367	0.673456
ENSG00000205090|TMEM240	360.069	-0.0381079	0.241307	-0.157923	0.874518	0.968719
ENSG00000160075|SSU72	25739.1	-0.163876	0.104101	-1.57421	0.115439	0.475291
ENSG00000197530|MIB2	8225.17	-0.135967	0.139617	-0.973863	0.330125	0.715396
ENSG00000116128|BCL9	13075.8	-0.0219305	0.0941727	-0.232875	0.815859	0.950754
ENSG00000174371|EXO1	6386.28	0.474184	0.131184	3.61465	0.000300749	0.0149294
ENSG00000196289|BECN2	6.80502	1.49967	1.89377	0.791894	0.428422	0.78325
ENSG00000197769|MAP1LC3C	180.947	-0.640354	0.31908	-2.00688	0.0447628	0.318706
ENSG00000162843|WDR64	0	NA	NA	NA	NA	NA
ENSG00000152760|DYNLT5	0	NA	NA	NA	NA	NA
ENSG00000152763|DNAI4	338.112	-0.277311	0.238961	-1.16049	0.24585	0.642797
ENSG00000118473|SGIP1	796.337	0.473217	0.206772	2.2886	0.0221029	0.225444
ENSG00000143815|LBR	12072.8	-0.059753	0.115217	-0.518612	0.604031	0.875351
ENSG00000185842|DNAH14	2059.81	0.100761	0.123773	0.814077	0.415601	0.776208
ENSG00000222046|DCDC2B	31.8371	-0.154858	0.746895	-0.207336	0.835748	0.958581
ENSG00000143479|DYRK3	2952.55	0.207822	0.128421	1.61829	0.105599	0.460603
ENSG00000120337|TNFSF18	1.62754	-4.01418	4.47429	-0.897166	0.369631	NA
ENSG00000162368|CMPK1	11440.6	0.0860965	0.0991499	0.868346	0.385205	0.754781
ENSG00000212916|MAP10	0	NA	NA	NA	NA	NA
ENSG00000162624|LHX8	1.55395	-3.94956	4.54615	-0.86877	0.384973	NA
ENSG00000117600|PLPPR4	204.479	0.916854	0.330532	2.77387	0.00553933	0.104145
ENSG00000076864|RAP1GAP	1907.41	-0.224831	0.139619	-1.61032	0.107329	0.463358
ENSG00000116981|NT5C1A	340.721	0.635203	0.276161	2.30012	0.0214414	0.221798
ENSG00000119283|TRIM67	404.381	-0.3102	0.278352	-1.11442	0.265101	0.662772
ENSG00000116191|RALGPS2	9799.65	0.151291	0.146522	1.03255	0.301817	0.696847
ENSG00000254685|FPGT	1627.58	0.0664643	0.14622	0.454549	0.649434	0.895277
ENSG00000177144|NUDT4B	2115.55	0.0492562	0.130351	0.377873	0.705525	0.915983
ENSG00000162398|LEXM	12.9798	-0.560548	1.08319	-0.517498	0.604809	0.875621
ENSG00000132196|HSD17B7	1370.95	-0.0264183	0.142314	-0.185634	0.852732	0.962551
ENSG00000163125|RPRD2	16714.6	0.122304	0.110858	1.10325	0.269918	0.667515
ENSG00000271383|NBPF19	3388.49	0.160314	0.144536	1.10916	0.267362	0.6651
ENSG00000205116|TMEM88B	62.1188	0.294779	0.578267	0.509762	0.610218	0.877353
ENSG00000117481|NSUN4	4448.84	0.199495	0.112122	1.77927	0.0751958	0.400024
ENSG00000196944|OR2T4	0.303042	1.81818	4.98036	0.365071	0.715059	NA
ENSG00000172410|INSL5	0	NA	NA	NA	NA	NA
ENSG00000116996|ZP4	0	NA	NA	NA	NA	NA
ENSG00000196418|ZNF124	896.736	0.197987	0.157629	1.25603	0.209106	0.604217
ENSG00000186440|OR6P1	0	NA	NA	NA	NA	NA
ENSG00000232237|ASCL5	62.3832	0.328173	0.64437	0.509292	0.610548	0.87759
ENSG00000196427|NBPF4	0.606083	2.84584	4.88317	0.582786	0.560038	NA
ENSG00000263513|FAM72C	2027.59	-0.491423	0.135135	-3.63652	0.000276341	0.0141522
ENSG00000143393|PI4KB	14478.8	-0.00274068	0.0921647	-0.0297368	0.976277	0.995145
ENSG00000197241|SLC2A7	2.78552	1.5935	2.59628	0.613762	0.539373	NA
ENSG00000196171|OR6K2	0.740962	3.15816	4.86418	0.649268	0.516165	NA
ENSG00000187170|LCE4A	0.465012	-2.20496	4.89008	-0.450904	0.652059	NA
ENSG00000160789|LMNA	66083	-0.386336	0.100734	-3.8352	0.000125461	0.00785798
ENSG00000127603|MACF1	26673.6	0.249174	0.179533	1.3879	0.165167	0.550122
ENSG00000219481|NBPF1	3396.42	0.425847	0.136427	3.12143	0.00179976	0.0510489
ENSG00000169717|ACTRT2	0	NA	NA	NA	NA	NA
ENSG00000187942|LDLRAD2	52.9395	0.202338	0.607408	0.333116	0.739047	0.926423
ENSG00000142798|HSPG2	16028.8	-0.111123	0.0887527	-1.25205	0.210552	0.606864
ENSG00000219073|CELA3B	0	NA	NA	NA	NA	NA
ENSG00000142789|CELA3A	0	NA	NA	NA	NA	NA
ENSG00000070831|CDC42	21654.3	-0.0292834	0.0883428	-0.331474	0.740286	0.926967
ENSG00000162552|WNT4	483.361	-0.0256903	0.201488	-0.127503	0.898542	0.973684
ENSG00000263961|RHEX	17662	-0.329856	0.107738	-3.06165	0.00220118	0.058667
ENSG00000198049|AVPR1B	1042.14	-0.564107	0.207708	-2.71586	0.00661042	0.118559
ENSG00000196550|FAM72A	3314.61	-0.409789	0.121157	-3.3823	0.000718808	0.0273113
ENSG00000266028|SRGAP2	8938.11	-0.265431	0.0997965	-2.65973	0.00782039	0.128872
ENSG00000263528|IKBKE	1494.68	-0.0524338	0.173128	-0.30286	0.761996	0.934251
ENSG00000266094|RASSF5	156.707	1.06753	0.362453	2.94529	0.00322648	0.07493
ENSG00000143486|EIF2D	5349.48	-0.0522393	0.112975	-0.462397	0.643797	0.892754
ENSG00000058453|CROCC	1025.71	0.0504835	0.155109	0.325472	0.744824	0.9288
ENSG00000143494|VASH2	216.679	0.190468	0.287033	0.663576	0.506962	0.83033
ENSG00000215883|CYB5RL	1545.8	-0.00939036	0.129479	-0.0725242	0.942185	0.985113
ENSG00000158816|VWA5B1	0	NA	NA	NA	NA	NA
ENSG00000162650|ATXN7L2	1068.64	-0.04366	0.173054	-0.252291	0.800816	0.94656
ENSG00000120334|CENPL	4040.7	0.0453267	0.118521	0.382436	0.702138	0.915121
ENSG00000162714|ZNF496	7767.49	-0.0796719	0.0937624	-0.849721	0.39548	0.762803
ENSG00000179639|FCER1A	0	NA	NA	NA	NA	NA
ENSG00000152061|RABGAP1L	16327.2	0.000349868	0.142513	0.00245498	0.998041	0.999865
ENSG00000116748|AMPD1	2.71686	5.02777	3.70809	1.35589	0.175134	NA
ENSG00000177414|UBE2U	0	NA	NA	NA	NA	NA
ENSG00000286015	87.4104	0.0267518	0.4436	0.0603061	0.951912	0.988843
ENSG00000143147|GPR161	14723.7	-0.340748	0.116278	-2.93045	0.00338476	0.0775305
ENSG00000121904|CSMD2	1.81825	4.43758	4.29149	1.03404	0.301116	NA
ENSG00000134256|CD101	207.085	-0.154176	0.297821	-0.51768	0.604682	0.875595
ENSG00000143772|ITPKB	4991.52	0.169904	0.0987818	1.72	0.0854332	0.421336
ENSG00000049246|PER3	6608.9	0.122457	0.138568	0.883729	0.376842	0.749385
[truncated: 17,938 more rows]

## Sheet: Adjp less 0.05
	baseMean	log2FoldChange	lfcSE	stat	pvalue	padj
ENSG00000162496|DHRS3	977.077	-0.623022	0.164364	-3.79051	0.00015034	0.00906222
ENSG00000180758|GPR157	10988.6	-0.403449	0.095854	-4.20899	2.56514e-05	0.00217616
ENSG00000162413|KLHL21	4418.43	0.325224	0.100697	3.22972	0.00123911	0.0401373
ENSG00000273274|ZBTB8B	827.213	0.527659	0.168288	3.13545	0.0017159	0.0497517
ENSG00000158286|RNF207	1145.87	0.597896	0.181812	3.28853	0.00100711	0.0346525
ENSG00000127129|EDN2	725.642	-0.713341	0.195624	-3.6465	0.000265841	0.0137945
ENSG00000092853|CLSPN	8666.45	0.550081	0.112893	4.8726	1.1014e-06	0.000177704
ENSG00000169213|RAB3B	1161.23	0.978393	0.164551	5.94583	2.75058e-09	1.02565e-06
ENSG00000285839	171.543	4.15601	0.456247	9.10912	8.30512e-20	3.32911e-16
ENSG00000162437|RAVER2	4496.43	0.359381	0.114028	3.15168	0.00162332	0.0476499
ENSG00000123080|CDKN2C	364.986	-0.881452	0.227331	-3.87739	0.000105582	0.0068262
ENSG00000162616|DNAJB4	1761.95	0.435345	0.135871	3.20411	0.00135481	0.0420488
ENSG00000162607|USP1	14965.7	0.472543	0.129938	3.63667	0.000276187	0.0141522
ENSG00000085999|RAD54L	2792.31	0.383905	0.111591	3.44029	0.000581092	0.023708
ENSG00000137941|TTLL7	1364.62	0.613736	0.156915	3.91126	9.18165e-05	0.00626817
ENSG00000134215|VAV3	19624.1	-0.433782	0.0987898	-4.39096	1.12853e-05	0.00111011
ENSG00000152078|TLCD4	1323.01	0.650912	0.164858	3.94831	7.8705e-05	0.00551073
ENSG00000055732|MCOLN3	2451.35	0.528332	0.114232	4.62508	3.7446e-06	0.000457192
ENSG00000134258|VTCN1	7048.7	-0.646864	0.100159	-6.45836	1.05845e-10	6.28564e-08
ENSG00000134222|PSRC1	3869.53	-0.653483	0.109589	-5.96305	2.47573e-09	9.4514e-07
ENSG00000171517|LPAR3	8373.78	-0.632888	0.0987552	-6.40865	1.46813e-10	7.59357e-08
ENSG00000215784|FAM72D	1985.38	-0.487001	0.128742	-3.78278	0.000155087	0.00927861
ENSG00000169418|NPR1	15193.2	-0.395301	0.0937979	-4.21439	2.50456e-05	0.00213607
ENSG00000117281|CD160	82.2488	1.85046	0.544882	3.39607	0.000683603	0.0262851
ENSG00000126070|AGO3	5560.17	0.386115	0.107257	3.59989	0.000318347	0.0156097
ENSG00000163485|ADORA1	8060.72	-0.420952	0.112521	-3.74111	0.000183206	0.0105666
ENSG00000157064|NMNAT2	8132.73	-0.619197	0.116595	-5.31065	1.09235e-07	2.57842e-05
ENSG00000265972|TXNIP	23100.5	0.477313	0.137212	3.47865	0.000503938	0.021547
ENSG00000186197|EDARADD	131.848	1.1768	0.36583	3.21678	0.00129637	0.0414064
ENSG00000188610|FAM72B	2872.24	-0.422869	0.112995	-3.74236	0.000182299	0.0105523
ENSG00000163545|NUAK2	12176.9	-0.773251	0.139293	-5.55125	2.83627e-08	7.97838e-06
ENSG00000143153|ATP1B1	3278.72	0.572304	0.116438	4.9151	8.87381e-07	0.000146683
ENSG00000170382|LRRN2	2576.69	-0.664844	0.119081	-5.58314	2.36209e-08	7.146e-06
ENSG00000186007|LEMD1	497.182	-0.743827	0.200805	-3.70422	0.000212045	0.0117645
ENSG00000197472|ZNF695	1526.3	0.521704	0.143585	3.6334	0.000279708	0.0141925
ENSG00000133069|TMCC2	4560.2	-0.520426	0.1009	-5.15784	2.49821e-07	5.20212e-05
ENSG00000134245|WNT2B	1162	-1.13023	0.159245	-7.09744	1.27086e-12	1.27356e-09
ENSG00000117318|ID3	3813.21	-0.656977	0.132413	-4.96156	6.99291e-07	0.000119281
ENSG00000158716|DUSP23	715.135	-0.634123	0.173689	-3.65092	0.000261301	0.0136029
ENSG00000085552|IGSF9	17899.3	-0.583847	0.0945747	-6.1734	6.68386e-10	2.97692e-07
ENSG00000158710|TAGLN2	77533.8	-0.324616	0.100335	-3.23532	0.00121507	0.039518
ENSG00000117632|STMN1	26125.9	0.272659	0.0865232	3.15128	0.00162558	0.0476499
ENSG00000187554|TLR5	401.677	-2.32473	0.238128	-9.76253	1.63042e-22	1.3071e-18
ENSG00000134240|HMGCS2	133.444	-1.36551	0.360367	-3.78921	0.000151128	0.00907562
ENSG00000117394|SLC2A1	11702.7	-0.36439	0.0924376	-3.94201	8.08007e-05	0.00563286
ENSG00000121957|GPSM2	5700.23	-0.48443	0.11195	-4.32721	1.51007e-05	0.00141593
ENSG00000116747|RO60	6608.95	0.469525	0.132499	3.54361	0.00039469	0.0182376
ENSG00000162873|KLHDC8A	7910.63	-0.419554	0.0953545	-4.39994	1.0828e-05	0.00107836
ENSG00000085840|ORC1	3658.42	0.396581	0.10675	3.71505	0.000203167	0.0113901
ENSG00000181218|H2AW	320.193	-1.20754	0.249291	-4.8439	1.27317e-06	0.000194419
ENSG00000082512|TRAF5	1419.57	0.569922	0.135851	4.1952	2.72625e-05	0.00228863
ENSG00000117399|CDC20	18222.4	-0.604172	0.103298	-5.84882	4.95068e-09	1.76398e-06
ENSG00000132688|NES	644.72	0.736807	0.226413	3.25427	0.00113685	0.0378151
ENSG00000143320|CRABP2	16061.3	-0.553367	0.0993762	-5.56841	2.57079e-08	7.49455e-06
ENSG00000203814|H2BC18	1184.28	-0.672556	0.142077	-4.73376	2.20402e-06	0.000296968
ENSG00000203812|H2AC18	2645.46	-0.958595	0.133128	-7.20055	5.99681e-13	6.41019e-10
ENSG00000272196|H2AC19	2773.94	-0.93838	0.132956	-7.05783	1.69128e-12	1.58618e-09
ENSG00000184678|H2BC21	6751.15	-0.950129	0.123857	-7.67115	1.70464e-14	2.63604e-11
ENSG00000184260|H2AC20	354.237	-0.874554	0.236416	-3.69922	0.000216262	0.0118346
ENSG00000178096|BOLA1	564.887	-1.1217	0.208985	-5.36737	7.98921e-08	2.06611e-05
ENSG00000159164|SV2A	4926.43	0.357469	0.101332	3.52768	0.000419211	0.0188779
ENSG00000174371|EXO1	6386.28	0.474184	0.131184	3.61465	0.000300749	0.0149294
ENSG00000263513|FAM72C	2027.59	-0.491423	0.135135	-3.63652	0.000276341	0.0141522
ENSG00000160789|LMNA	66083	-0.386336	0.100734	-3.8352	0.000125461	0.00785798
ENSG00000196550|FAM72A	3314.61	-0.409789	0.121157	-3.3823	0.000718808	0.0273113
ENSG00000197956|S100A6	7653.8	-0.41672	0.119508	-3.48698	0.000488516	0.0211128
ENSG00000196154|S100A4	4690.15	-0.445957	0.132302	-3.37074	0.000749659	0.02815
ENSG00000196754|S100A2	4286.09	-0.426586	0.124983	-3.41316	0.000642146	0.0253635
ENSG00000115738|ID2	10533.2	-0.47683	0.108057	-4.41275	1.02065e-05	0.00103783
ENSG00000162981|LRATD1	1108.56	-0.918337	0.145239	-6.32292	2.56661e-10	1.24706e-07
ENSG00000143797|MBOAT2	2306.52	0.436233	0.137063	3.18271	0.00145904	0.0442145
ENSG00000152154|TMEM178A	707.324	-0.651866	0.170487	-3.82355	0.000131545	0.00817513
ENSG00000205221|VIT	5974.65	-0.480136	0.111984	-4.28755	1.80658e-05	0.00164584
ENSG00000115163|CENPA	2799.74	-0.592761	0.11657	-5.08501	3.67604e-07	7.188e-05
ENSG00000168874|ATOH8	3705.23	-0.719185	0.138531	-5.1915	2.08602e-07	4.40096e-05
ENSG00000152284|TCF7L1	4384.39	-0.35257	0.107536	-3.27863	0.00104314	0.0356406
ENSG00000143995|MEIS1	8340.46	-0.423136	0.0947579	-4.46544	7.99041e-06	0.000854121
ENSG00000150551|LYPD1	2518.77	-0.368255	0.114539	-3.2151	0.00130399	0.0415529
ENSG00000136720|HS6ST1	7399.34	-0.363167	0.101295	-3.58524	0.000336768	0.0163134
ENSG00000198142|SOWAHC	4096.97	0.417612	0.127531	3.27459	0.00105817	0.0358774
ENSG00000157856|DRC1	566.201	-0.939702	0.206877	-4.54233	5.56357e-06	0.000628213
ENSG00000144136|SLC20A1	5791.23	0.345133	0.10225	3.37537	0.000737155	0.0278107
ENSG00000115461|IGFBP5	5853.42	-0.548204	0.118114	-4.64131	3.46208e-06	0.000431779
ENSG00000248672|LY75-CD302	204.647	11.2578	1.47459	7.63453	2.2665e-14	3.02842e-11
ENSG00000115648|MLPH	1173.58	-0.49493	0.145437	-3.40304	0.0006664	0.0258718
ENSG00000157985|AGAP1	20400.8	-0.363483	0.102602	-3.54266	0.000396107	0.0182505
ENSG00000172318|B3GALT1	1835.96	-0.549932	0.13512	-4.06995	4.70222e-05	0.00362478
ENSG00000162924|REL	4635.24	0.705028	0.209858	3.35955	0.000780706	0.0289095
ENSG00000138413|IDH1	13973.4	-0.333159	0.0915019	-3.641	0.000271581	0.0140017
ENSG00000270757|HSPE1-MOB4	175.152	-24.1385	4.78503	-5.04459	4.54486e-07	8.37613e-05
ENSG00000213160|KLHL23	6628.34	0.508669	0.115055	4.42111	9.81962e-06	0.00102239
ENSG00000134317|GRHL1	2974.4	0.442851	0.119118	3.71775	0.000201001	0.0113083
ENSG00000162980|ARL5A	10503.9	0.416496	0.115653	3.60125	0.000316687	0.0155759
ENSG00000115935|WIPF1	941.927	0.501151	0.156199	3.20842	0.00133469	0.0417812
ENSG00000065911|MTHFD2	18158.9	0.410089	0.0929705	4.41095	1.02916e-05	0.00103783
ENSG00000135913|USP37	6406.33	0.585296	0.172838	3.38638	0.00070821	0.0270367
ENSG00000118257|NRP2	4256.81	-0.543344	0.121261	-4.48077	7.43731e-06	0.000805742
ENSG00000135905|DOCK10	806.006	0.760329	0.223218	3.40622	0.000658697	0.0258228
ENSG00000066032|CTNNA2	2643.91	-0.453724	0.127744	-3.55181	0.000382584	0.0178844
ENSG00000080345|RIF1	16291.9	0.636581	0.195371	3.25832	0.00112073	0.0375152
ENSG00000125618|PAX8	119031	-0.287397	0.0852056	-3.37299	0.00074358	0.0279872
ENSG00000173559|NABP1	10282.2	0.333597	0.105231	3.17013	0.00152372	0.0454486
ENSG00000214336|FOXI3	2663.43	-0.430412	0.121744	-3.5354	0.000407161	0.0185552
ENSG00000175879|HOXD8	2138.11	-0.460085	0.119454	-3.85157	0.000117362	0.00746741
ENSG00000188452|CERKL	44.0586	2.29744	0.675371	3.40175	0.000669555	0.0259315
ENSG00000071282|LMCD1	16949.9	-0.411417	0.0858797	-4.79062	1.66264e-06	0.000232859
ENSG00000157087|ATP2B2	6769.85	-0.538827	0.114409	-4.70966	2.4813e-06	0.000326108
ENSG00000206538|VGLL3	683.39	1.08091	0.21417	5.04697	4.48868e-07	8.36877e-05
ENSG00000163507|CIP2A	14693.2	0.453183	0.139746	3.2429	0.00118318	0.0387165
ENSG00000153551|CMTM7	12242.7	-0.403738	0.104045	-3.88042	0.000104278	0.00677691
ENSG00000001617|SEMA3F	2653.99	-0.528135	0.13083	-4.03681	5.41824e-05	0.00404074
ENSG00000114125|RNF7	8819.46	-0.361802	0.11122	-3.25305	0.00114175	0.0378239
ENSG00000168811|IL12A	1664.01	-0.493317	0.138418	-3.56397	0.000365283	0.0174314
ENSG00000169860|P2RY1	1337.65	0.621338	0.166904	3.72273	0.000197077	0.0111658
ENSG00000082684|SEMA5B	8592.36	-0.705895	0.100117	-7.05066	1.78067e-12	1.58618e-09
ENSG00000163840|DTX3L	30774.9	0.412209	0.111372	3.70118	0.000214602	0.0118245
ENSG00000114315|HES1	11922.8	-0.618283	0.154298	-4.00706	6.14782e-05	0.00452175
ENSG00000163961|RNF168	7670.17	0.422551	0.118539	3.56467	0.000364318	0.0174314
ENSG00000090530|P3H2	2290.71	0.438276	0.124617	3.51698	0.000436484	0.0193867
ENSG00000163781|TOPBP1	31097.3	0.464551	0.128009	3.62906	0.000284451	0.0143424
ENSG00000178149|DALRD3	2573.05	-0.636065	0.183246	-3.47109	0.00051835	0.0219874
ENSG00000013297|CLDN11	465.161	0.774794	0.205602	3.76841	0.000164288	0.00961385
ENSG00000114450|GNB4	2266.29	0.547385	0.155393	3.52258	0.000427365	0.0191365
ENSG00000134107|BHLHE40	9624.59	-0.42468	0.0962625	-4.41169	1.02566e-05	0.00103783
ENSG00000163428|LRRC58	23722.9	0.423246	0.125041	3.38485	0.000712173	0.0271235
ENSG00000114698|PLSCR4	826.346	0.575886	0.165271	3.48449	0.000493067	0.0211953
ENSG00000114786|ABHD14A-ACY1	553.893	-4.00515	0.982959	-4.07459	4.60959e-05	0.00358901
ENSG00000154917|RAB6B	21624.7	-0.300175	0.0868087	-3.45789	0.00054442	0.0225561
ENSG00000288698	286.969	-1.10548	0.251536	-4.39491	1.1082e-05	0.00109684
ENSG00000164050|PLXNB1	36065.9	-0.327812	0.0982839	-3.33535	0.000851914	0.030904
ENSG00000164045|CDC25A	5443.56	0.533211	0.103551	5.14923	2.61556e-07	5.25913e-05
ENSG00000114554|PLXNA1	24939.9	-0.389373	0.086376	-4.50789	6.54766e-06	0.000719076
ENSG00000144554|FANCD2	8526.56	0.37562	0.102785	3.65443	0.000257756	0.0134621
ENSG00000082781|ITGB5	68108	-0.487146	0.0835071	-5.83359	5.42467e-09	1.89085e-06
ENSG00000051341|POLQ	7850.57	0.642511	0.169145	3.79859	0.000145521	0.0088546
ENSG00000196353|CPNE4	4274.28	-0.581749	0.111445	-5.22007	1.78857e-07	3.92848e-05
ENSG00000144857|BOC	29705.3	-0.702985	0.0853798	-8.23362	1.81637e-16	4.85395e-13
ENSG00000168386|FILIP1L	374.726	0.934885	0.270133	3.46083	0.000538522	0.0223696
ENSG00000184897|H1-10	42657.7	-0.641702	0.115443	-5.55859	2.71965e-08	7.78694e-06
ENSG00000127418|FGFRL1	22692.5	-0.363225	0.099064	-3.66657	0.000245823	0.0130083
ENSG00000131127|ZNF141	4748.65	0.441083	0.137277	3.21309	0.00131316	0.0415542
ENSG00000188848|BEND4	175.407	1.24013	0.384262	3.22731	0.00124959	0.0401688
ENSG00000157765|SLC34A2	133813	-0.339897	0.0833576	-4.07758	4.55076e-05	0.00357681
ENSG00000196782|MAML3	1688.21	-0.564675	0.138104	-4.08876	4.33691e-05	0.0034596
ENSG00000185477|GPRIN3	389.085	0.96247	0.28972	3.32207	0.000893527	0.032051
ENSG00000138685|FGF2	295.663	1.03981	0.277162	3.75164	0.000175678	0.010243
ENSG00000137462|TLR2	96.3212	1.5376	0.435954	3.52699	0.000420319	0.0188779
ENSG00000061918|GUCY1B1	21651.2	-0.317639	0.0994831	-3.1929	0.00140854	0.0432653
ENSG00000163291|PAQR3	4518.1	0.504396	0.136822	3.68652	0.000227338	0.0123146
ENSG00000163995|ABLIM2	1220.37	-0.531575	0.152062	-3.49577	0.000472696	0.0206518
ENSG00000184985|SORCS2	2423.12	-0.427176	0.1139	-3.75043	0.000176529	0.0102553
ENSG00000145506|NKD2	1929.89	-0.687804	0.158115	-4.35002	1.36124e-05	0.00129149
ENSG00000134363|FST	22196.1	-0.40612	0.104794	-3.8754	0.00010645	0.00685472
ENSG00000145526|CDH18	10400.3	-0.447266	0.104356	-4.28597	1.81944e-05	0.00164818
ENSG00000198780|FAM169A	827.365	0.824915	0.238339	3.4611	0.000537966	0.0223696
ENSG00000113448|PDE4D	1603.32	-0.430822	0.135065	-3.18974	0.00142399	0.0434899
ENSG00000134352|IL6ST	13937.1	0.588515	0.169492	3.47224	0.000516138	0.0219516
ENSG00000133302|SLF1	3505.1	0.513837	0.146799	3.50026	0.000464797	0.0203622
ENSG00000113456|RAD1	12874.9	0.290813	0.0887275	3.2776	0.00104694	0.0356406
ENSG00000145687|SSBP2	2690.08	-0.414639	0.119485	-3.47021	0.000520045	0.0220011
ENSG00000134057|CCNB1	26801.4	-0.469892	0.0884842	-5.31046	1.0935e-07	2.57842e-05
ENSG00000131711|MAP1B	3449.9	0.64206	0.180748	3.55224	0.000381966	0.0178844
ENSG00000176788|BASP1	6752.61	0.410495	0.100163	4.09828	4.16239e-05	0.00333699
ENSG00000158458|NRG2	1397.66	-0.555058	0.14225	-3.90198	9.5408e-05	0.00640072
ENSG00000171604|CXXC5	11463	-0.357704	0.111459	-3.20929	0.00133064	0.0417525
ENSG00000112984|KIF20A	11506.3	-0.808656	0.0991975	-8.15198	3.58017e-16	7.17555e-13
ENSG00000164611|PTTG1	13899.4	-0.342118	0.104744	-3.26623	0.00108992	0.0367909
ENSG00000118985|ELL2	3174.93	0.43143	0.135616	3.18126	0.00146633	0.0442145
ENSG00000113269|RNF130	13630.9	-0.329139	0.0895561	-3.67523	0.000237635	0.0127433
ENSG00000169247|SH3TC2	386.658	0.735755	0.221915	3.31547	0.000914877	0.0323822
ENSG00000131503|ANKHD1	7105.5	0.557196	0.119476	4.66367	3.10614e-06	0.00039843
ENSG00000239389|PCDHA13	21.7918	5.56671	1.74992	3.18113	0.00146701	0.0442145
ENSG00000182132|KCNIP1	163.496	-1.27284	0.334883	-3.80085	0.000144199	0.00882477
ENSG00000074317|SNCB	1443.31	-0.882032	0.144242	-6.11493	9.66015e-10	4.18624e-07
ENSG00000120738|EGR1	55734.5	-0.620656	0.184969	-3.35547	0.000792313	0.0291481
ENSG00000197603|CPLANE1	6089.89	0.694543	0.206537	3.3628	0.000771564	0.0288374
ENSG00000288622|PDCD6-AHRR	334.14	-7.3699	1.81244	-4.06629	4.77668e-05	0.00366456
ENSG00000276180|H4C9	2546.77	-0.779494	0.137188	-5.68194	1.33173e-08	4.10633e-06
ENSG00000172197|MBOAT1	4517.7	-0.340253	0.107907	-3.15319	0.00161494	0.0475119
ENSG00000112149|CD83	946.057	0.521822	0.158559	3.29103	0.000998212	0.0345411
ENSG00000161896|IP6K3	9.38556	-6.54252	2.04015	-3.20689	0.00134178	0.0418082
ENSG00000124614|RPS10	32931	-0.403629	0.120839	-3.34023	0.000837095	0.030574
ENSG00000025039|RRAGD	1902.21	0.517656	0.123241	4.20036	2.66492e-05	0.00224891
ENSG00000112118|MCM3	19782.9	0.377941	0.088911	4.25078	2.13028e-05	0.0018665
ENSG00000172461|FUT9	1277.26	0.945245	0.211874	4.46135	8.14444e-06	0.00086482
ENSG00000119900|OGFRL1	2397.96	0.465478	0.140501	3.31299	0.000923046	0.0324564
ENSG00000118495|PLAGL1	1919.76	0.734334	0.137306	5.34818	8.88449e-08	2.22033e-05
ENSG00000146411|SLC2A12	22645	-0.440799	0.112763	-3.90907	9.26503e-05	0.00626817
ENSG00000164488|DACT2	1581.72	-0.709508	0.161807	-4.38489	1.16043e-05	0.00112766
ENSG00000118412|CASP8AP2	2614.04	0.697356	0.204468	3.41058	0.000648245	0.0254754
ENSG00000197903|H2BC12	9099.59	-0.831145	0.108454	-7.66356	1.80844e-14	2.63604e-11
ENSG00000096060|FKBP5	3066.26	0.607413	0.134667	4.51047	6.46836e-06	0.000717464
ENSG00000092820|EZR	91270.1	-0.326788	0.0841241	-3.8846	0.0001025	0.0067081
ENSG00000187837|H1-2	8595.84	-0.794816	0.123755	-6.42252	1.3404e-10	7.33123e-08
ENSG00000180596|H2BC4	3301.02	-0.555951	0.114238	-4.86661	1.1353e-06	0.000180231
ENSG00000168298|H1-4	350.965	-0.881838	0.250919	-3.51443	0.0004407	0.0195198
ENSG00000172348|RCAN2	906.144	0.553904	0.158733	3.48954	0.000483845	0.0210243
ENSG00000137266|SLC22A23	2588.9	-0.384828	0.112269	-3.42774	0.000608626	0.0245811
ENSG00000180573|H2AC6	4355.97	-0.734135	0.120601	-6.0873	1.14829e-09	4.6029e-07
ENSG00000277224|H2BC7	318.947	-1.10062	0.288687	-3.81251	0.000137564	0.00848347
ENSG00000277075|H2AC8	146.57	-1.12142	0.342717	-3.27213	0.00106739	0.0361065
ENSG00000158406|H4C8	1646.89	-0.93484	0.141199	-6.62071	3.57486e-11	2.29277e-08
ENSG00000016402|IL20RA	3938.41	-0.360625	0.111427	-3.23642	0.00121041	0.039518
ENSG00000146263|MMS22L	5056.84	0.511345	0.133108	3.84159	0.000122241	0.00768634
ENSG00000274750|H3C6	314.074	-0.905998	0.244988	-3.69812	0.000217198	0.0118454
ENSG00000146426|TIAM2	770.331	0.616347	0.17986	3.42682	0.000610684	0.0246023
ENSG00000164663|USP49	1651.6	0.474358	0.142899	3.31953	0.000901691	0.0321998
ENSG00000136205|TNS3	10216.2	-0.338567	0.102146	-3.31454	0.000917941	0.0324038
ENSG00000106524|ANKMY2	1897.06	0.42793	0.134566	3.18008	0.00147237	0.0442925
ENSG00000146729|NIPSNAP2	8352.77	-0.335844	0.0934108	-3.59534	0.000323965	0.0158368
ENSG00000242265|PEG10	42546.6	0.61011	0.166383	3.66689	0.000245516	0.0130083
ENSG00000185274|GALNT17	5700.24	-0.530904	0.101603	-5.22526	1.73907e-07	3.8728e-05
ENSG00000128567|PODXL	34333.8	-0.394804	0.109464	-3.60669	0.000310129	0.0153003
ENSG00000170381|SEMA3E	70.7474	1.79264	0.505619	3.54544	0.000391964	0.018164
ENSG00000160963|COL26A1	9582.95	-0.521899	0.104382	-4.99987	5.73678e-07	9.8907e-05
ENSG00000181444|ZNF467	1538	-0.468358	0.141575	-3.3082	0.000938972	0.0328722
ENSG00000196584|XRCC2	7580.44	0.715319	0.153285	4.6666	3.06225e-06	0.000395969
ENSG00000106211|HSPB1	21928.7	-0.395161	0.11121	-3.55329	0.000380444	0.0178844
ENSG00000075624|ACTB	382318	-0.271339	0.0849134	-3.19547	0.00139601	0.0430203
ENSG00000106624|AEBP1	3259.21	0.391468	0.12099	3.23553	0.00121418	0.039518
ENSG00000165215|CLDN3	6293.87	-0.583989	0.143704	-4.06384	4.82716e-05	0.00368565
ENSG00000105976|MET	3320.66	0.746258	0.168725	4.42294	9.73679e-06	0.00102039
ENSG00000275896|PRSS2	2351.64	-0.485562	0.145271	-3.34246	0.000830381	0.0304676
ENSG00000105835|NAMPT	10220.8	0.48038	0.104842	4.58192	4.60715e-06	0.000539205
ENSG00000105939|ZC3HAV1	7451.23	0.418192	0.130121	3.21388	0.00130953	0.0415542
ENSG00000122591|FAM126A	2417.68	0.642711	0.197532	3.2537	0.00113912	0.0378151
ENSG00000135205|CCDC146	6951.94	-0.45609	0.0974274	-4.68133	2.85013e-06	0.000371537
ENSG00000131831|RAI2	5064.5	-0.35006	0.105543	-3.31675	0.00091072	0.0323064
ENSG00000123572|NRK	267.188	1.0312	0.310547	3.32059	0.000898272	0.0321493
ENSG00000182195|LDOC1	9026.24	-0.372349	0.106311	-3.50245	0.000460994	0.0203065
ENSG00000186310|NAP1L3	9700.36	-0.438326	0.0971344	-4.51257	6.40462e-06	0.000717464
ENSG00000147231|RADX	896.243	0.593093	0.173436	3.41966	0.000626983	0.0249619
ENSG00000147180|ZNF711	2765.03	0.564835	0.154554	3.6546	0.000257581	0.0134621
ENSG00000147224|PRPS1	4268.86	0.351034	0.101231	3.46764	0.000525042	0.022154
ENSG00000022267|FHL1	1789.12	0.411346	0.127961	3.21463	0.00130614	0.0415529
ENSG00000085185|BCORL1	8308.77	0.328489	0.0998249	3.29065	0.000999568	0.0345411
ENSG00000067842|ATP2B3	8.846	6.72931	2.09769	3.20797	0.00133677	0.0417812
ENSG00000179083|FAM133A	4643.7	-0.514429	0.102043	-5.04128	4.62431e-07	8.4257e-05
ENSG00000171320|ESCO2	4382.03	0.527105	0.14976	3.51967	0.000432086	0.0192446
ENSG00000120885|CLU	123086	-0.38803	0.108812	-3.56606	0.000362385	0.0173967
ENSG00000206579|XKR4	329.683	-1.29549	0.266834	-4.85504	1.20364e-06	0.00018737
ENSG00000183779|ZNF703	3084.49	-0.51996	0.113741	-4.57144	4.84377e-06	0.00056279
ENSG00000164683|HEY1	984.478	-0.575018	0.164562	-3.49424	0.000475415	0.0207141
ENSG00000265817|FSBP	1211.23	0.63281	0.183042	3.45718	0.000545869	0.0225579
ENSG00000104267|CA2	23067.8	-0.677399	0.0846383	-8.00346	1.20971e-15	2.15516e-12
ENSG00000147536|GINS4	6158.28	0.302815	0.0955287	3.16989	0.00152497	0.0454486
ENSG00000197275|RAD54B	2450.97	0.432852	0.131576	3.28974	0.00100279	0.034578
ENSG00000136982|DSCC1	4397.05	0.419557	0.106163	3.95199	7.75025e-05	0.00545033
ENSG00000137575|SDCBP	9288.59	0.314879	0.100144	3.14427	0.00166502	0.0486283
ENSG00000198846|TOX	7805.11	-0.322732	0.101744	-3.17201	0.00151389	0.0452868
ENSG00000136997|MYC	4020.26	-0.470135	0.122201	-3.84723	0.00011946	0.00757082
ENSG00000178764|ZHX2	11631.3	-0.466433	0.0927548	-5.02867	4.93894e-07	8.60772e-05
ENSG00000156802|ATAD2	14002.2	0.616268	0.16981	3.62917	0.000284337	0.0143424
ENSG00000104450|SPAG1	2435.09	0.38673	0.118821	3.25474	0.00113498	0.0378151
ENSG00000104369|JPH1	1908.93	0.643891	0.161857	3.97814	6.94576e-05	0.0049941
ENSG00000160948|VPS28	1979.85	-0.461829	0.145795	-3.16767	0.00153668	0.0455438
ENSG00000164733|CTSB	41600.7	-0.303985	0.0905968	-3.35537	0.000792602	0.0291481
ENSG00000077782|FGFR1	47437.8	-0.512177	0.0899533	-5.69382	1.2423e-08	3.90571e-06
ENSG00000185697|MYBL1	1224.8	0.551867	0.173202	3.18627	0.00144121	0.0439321
ENSG00000135048|CEMIP2	5396.45	0.701667	0.133496	5.2561	1.47144e-07	3.37043e-05
ENSG00000136842|TMOD1	1091.35	-0.744174	0.199705	-3.72636	0.000194265	0.0110455
ENSG00000180447|GAS1	8004.75	-0.393496	0.098384	-3.99959	6.34518e-05	0.00461405
ENSG00000251349|MSANTD3-TMEFF1	44.7581	-3.49635	0.753425	-4.64061	3.47384e-06	0.000431779
ENSG00000241697|TMEFF1	899.166	0.616279	0.163359	3.77255	0.000161585	0.00952522
ENSG00000186350|RXRA	4564.2	-0.361182	0.100764	-3.58443	0.000337818	0.016315
ENSG00000136830|NIBAN2	19246.9	-0.368138	0.0948774	-3.88014	0.000104397	0.00677691
ENSG00000106976|DNM1	2357.9	0.483058	0.121193	3.98587	6.72343e-05	0.00485601
ENSG00000054179|ENTPD2	4437.47	-0.850515	0.121379	-7.00713	2.43264e-12	2.05289e-09
ENSG00000186193|SAPCD2	9008.84	-0.678864	0.101942	-6.65934	2.75056e-11	1.8376e-08
ENSG00000176101|SSNA1	5816.28	-0.536365	0.116127	-4.61877	3.86026e-06	0.000465379
ENSG00000165716|DIPK1B	5533.41	-0.409976	0.125609	-3.26391	0.00109884	0.0369368
ENSG00000159921|GNE	5426.58	0.401707	0.112805	3.56106	0.000369356	0.0174698
ENSG00000107249|GLIS3	14081.8	-0.520998	0.124344	-4.18997	2.78995e-05	0.0023299
ENSG00000107130|NCS1	27785.6	-0.301734	0.0850211	-3.54892	0.000386808	0.0180293
ENSG00000130707|ASS1	35429.3	-0.604889	0.106096	-5.70134	1.18867e-08	3.88962e-06
ENSG00000148357|HMCN2	3660.38	-0.638733	0.112104	-5.69765	1.21467e-08	3.8952e-06
ENSG00000235453|SMIM27	574.228	-1.2767	0.198619	-6.42791	1.29374e-10	7.33123e-08
ENSG00000166405|RIC3	590.307	-0.979997	0.202073	-4.84973	1.23631e-06	0.000190605
ENSG00000166407|LMO1	3466.06	-0.686976	0.117887	-5.82742	5.62898e-09	1.92032e-06
ENSG00000262655|SPON1	79115.1	-0.341581	0.0922856	-3.70135	0.000214456	0.0118245
ENSG00000146670|CDCA5	11516.9	0.309036	0.091447	3.3794	0.000726448	0.0274714
ENSG00000167995|BEST1	15558.1	0.63428	0.130206	4.87137	1.10829e-06	0.000177704
ENSG00000006534|ALDH3B1	5665.84	-0.398654	0.112738	-3.53611	0.000406058	0.0185552
ENSG00000173227|SYT12	725.547	-0.557572	0.174717	-3.19129	0.00141638	0.043423
ENSG00000077514|POLD3	4988.27	0.400401	0.119992	3.33689	0.000847222	0.0308035
ENSG00000023445|BIRC3	254.641	1.27576	0.299359	4.26165	2.02927e-05	0.00181773
ENSG00000149289|ZC3H12C	1443.53	0.587851	0.169634	3.46541	0.000529427	0.0222804
ENSG00000173442|EHBP1L1	15779	0.377562	0.101485	3.72039	0.000198913	0.0112302
ENSG00000110057|UNC93B1	5473.36	-0.423929	0.114324	-3.70814	0.00020879	0.0116646
ENSG00000137699|TRIM29	13164.1	-0.348372	0.101558	-3.43029	0.000602935	0.0244128
ENSG00000085117|CD82	7246.41	-0.546817	0.127447	-4.29056	1.78225e-05	0.00163295
ENSG00000158555|GDPD5	22871.6	-0.444366	0.106236	-4.1828	2.87939e-05	0.00239213
ENSG00000110042|DTX4	16783.5	-0.370159	0.0858515	-4.31162	1.62064e-05	0.00150205
ENSG00000184524|CEND1	1871	-0.570678	0.156962	-3.63577	0.000277148	0.0141522
ENSG00000120457|KCNJ5	2182.31	-0.627105	0.117515	-5.33639	9.48168e-08	2.30347e-05
ENSG00000149308|NPAT	2883.99	0.503922	0.159005	3.16922	0.0015285	0.0454694
ENSG00000049449|RCN1	29705	0.286332	0.0852088	3.36035	0.00077843	0.028892
ENSG00000121653|MAPK8IP1	12771.4	-0.406589	0.100369	-4.05093	5.10142e-05	0.00387659
ENSG00000168496|FEN1	16338.3	0.292533	0.0859563	3.40328	0.000665816	0.0258718
ENSG00000166402|TUB	4696.14	0.436291	0.127389	3.42486	0.000615116	0.0247187
ENSG00000285509|TBCEL-TECTA	81.9064	1.66415	0.519414	3.20389	0.00135582	0.0420488
ENSG00000288534	293.47	-1.8829	0.442077	-4.25922	2.05143e-05	0.00182737
ENSG00000166670|MMP10	595.387	-0.824606	0.187035	-4.40882	1.03933e-05	0.00104154
ENSG00000196611|MMP1	164.569	-1.31424	0.337936	-3.88902	0.000100651	0.00666876
ENSG00000066382|MPPED2	938.791	-0.489609	0.156085	-3.13682	0.00170792	0.0496101
ENSG00000189431|RASSF10	505.792	-0.747076	0.211324	-3.53522	0.000407432	0.0185552
ENSG00000165490|DDIAS	5190.79	0.446073	0.114102	3.90941	9.25211e-05	0.00626817
ENSG00000175591|P2RY2	13634.5	-0.512068	0.0993785	-5.1527	2.56756e-07	5.25913e-05
ENSG00000078124|ACER3	28609.4	0.317108	0.0976885	3.24612	0.0011699	0.0383603
ENSG00000175352|NRIP3	1228.01	0.594151	0.14085	4.21833	2.46116e-05	0.00212645
ENSG00000149016|TUT1	3074.67	-0.806157	0.200587	-4.01898	5.84504e-05	0.00431886
ENSG00000188486|H2AX	13991.6	-0.377803	0.107929	-3.50048	0.000464421	0.0203622
ENSG00000076706|MCAM	3998.68	0.691078	0.107661	6.419	1.37169e-10	7.33123e-08
ENSG00000168000|BSCL2	2269.59	-0.686766	0.145427	-4.72242	2.3306e-06	0.000308834
ENSG00000172890|NADSYN1	3839.59	-0.383188	0.120625	-3.17668	0.00148969	0.0446463
ENSG00000085741|WNT11	1059.48	-0.540114	0.171205	-3.15478	0.00160619	0.0473413
ENSG00000149554|CHEK1	4652.53	0.465296	0.12109	3.84258	0.00012175	0.00768556
ENSG00000186174|BCL9L	12751.6	-0.282176	0.0876519	-3.21928	0.00128513	0.0411294
ENSG00000120594|PLXDC2	3649.49	-0.456883	0.137671	-3.31865	0.000904543	0.0322225
ENSG00000165655|ZNF503	12933	-0.348691	0.0918059	-3.79813	0.000145791	0.0088546
ENSG00000165886|UBTD1	1973.81	-0.535513	0.150375	-3.56118	0.000369191	0.0174698
ENSG00000107742|SPOCK2	11826.8	-0.357999	0.0935308	-3.82761	0.000129394	0.00807276
ENSG00000138346|DNA2	4510.53	0.451338	0.141836	3.18211	0.00146204	0.0442145
ENSG00000214435|AS3MT	1719.23	0.467854	0.130315	3.59017	0.000330466	0.0161054
ENSG00000148735|PLEKHS1	1049.47	-0.575961	0.150893	-3.81702	0.000135071	0.00836186
ENSG00000213551|DNAJC9	4392.9	0.372118	0.100378	3.70718	0.000209583	0.0116682
ENSG00000120539|MASTL	8001.41	0.624277	0.129288	4.82857	1.3752e-06	0.000200454
ENSG00000119969|HELLS	5393.02	0.445213	0.0993422	4.48161	7.40826e-06	0.000805742
ENSG00000183049|CAMK1D	4847.72	-0.373208	0.103286	-3.61335	0.000302267	0.0149585
ENSG00000156510|HKDC1	3852.14	-0.503484	0.105118	-4.78972	1.67012e-06	0.000232859
ENSG00000065328|MCM10	2660.76	0.613785	0.126276	4.86066	1.16992e-06	0.000183908
ENSG00000108175|ZMIZ1	9835.72	-0.433004	0.110459	-3.92004	8.85339e-05	0.00611876
ENSG00000119906|SLF2	14897.2	0.589911	0.151786	3.88647	0.000101712	0.00668382
ENSG00000067064|IDI1	4422.9	0.380743	0.121517	3.13324	0.00172891	0.0498584
ENSG00000151892|GFRA1	334.718	0.936041	0.232749	4.02167	5.7788e-05	0.00428969
ENSG00000122877|EGR2	1163.51	-1.13997	0.221759	-5.14061	2.73855e-07	5.42097e-05
ENSG00000108018|SORCS1	12609.4	-0.407677	0.119222	-3.41949	0.000627394	0.0249619
ENSG00000048540|LMO3	14794.7	-0.312719	0.0916258	-3.413	0.000642522	0.0253635
ENSG00000246705|H2AJ	2771	-0.497727	0.147829	-3.3669	0.000760181	0.0284784
ENSG00000167778|SPRYD3	2581.6	-0.366027	0.116526	-3.14116	0.0016828	0.0490581
ENSG00000118596|SLC16A7	4301.71	0.660978	0.205798	3.21178	0.00131914	0.0415542
ENSG00000111602|TIMELESS	15621.1	0.397339	0.0871285	4.56037	5.10628e-06	0.000589022
ENSG00000111057|KRT18	176081	-0.54868	0.102173	-5.37012	7.86849e-08	2.06611e-05
ENSG00000079337|RAPGEF3	10475.9	-0.664377	0.100518	-6.60955	3.85481e-11	2.37723e-08
ENSG00000139318|DUSP6	2636.2	-0.512465	0.144005	-3.55866	0.000372746	0.0175783
ENSG00000049130|KITLG	1647.69	0.592092	0.156562	3.78183	0.000155677	0.00927925
ENSG00000075035|WSCD2	6435	-0.699254	0.0970018	-7.20867	5.6502e-13	6.41019e-10
ENSG00000211584|SLC48A1	12581.7	-0.566904	0.107964	-5.25085	1.51403e-07	3.41914e-05
ENSG00000196498|NCOR2	40292.7	-0.414448	0.0839833	-4.93489	8.01977e-07	0.000133947
ENSG00000139292|LGR5	8376.54	-0.384355	0.107095	-3.58891	0.000332062	0.0161342
ENSG00000166578|IQCD	2275.83	-0.554211	0.116938	-4.73937	2.14381e-06	0.000291304
ENSG00000135678|CPM	18984.7	-0.396258	0.0931755	-4.25281	2.11107e-05	0.00185983
ENSG00000178882|RFLNA	347.186	-0.787286	0.237271	-3.31809	0.000906346	0.0322225
ENSG00000135480|KRT7	66628.1	-0.316107	0.0960617	-3.29066	0.000999519	0.0345411
ENSG00000123095|BHLHE41	21058.7	-0.46896	0.115096	-4.07451	4.61105e-05	0.00358901
ENSG00000139163|ETNK1	17234	0.437069	0.136622	3.1991	0.00137857	0.0426718
ENSG00000135414|GDF11	10052.5	0.349418	0.103385	3.37979	0.00072541	0.0274714
ENSG00000166881|NEMP1	12132.6	0.458334	0.126688	3.61782	0.000297097	0.0148864
ENSG00000061273|HDAC7	40660.4	-0.360287	0.0953055	-3.78034	0.000156615	0.00929251
ENSG00000111424|VDR	11521.2	-0.338599	0.0920873	-3.67694	0.000236052	0.0127124
ENSG00000186815|TPCN1	16466.2	-0.468779	0.0884091	-5.30238	1.14304e-07	2.65616e-05
ENSG00000174527|MYO1H	9.4919	-6.55967	2.01734	-3.25164	0.0011474	0.0378548
ENSG00000184445|KNTC1	9617.21	0.523456	0.131778	3.97225	7.11965e-05	0.00509627
ENSG00000111319|SCNN1A	26731.3	-0.390212	0.0996002	-3.91779	8.93659e-05	0.00614975
ENSG00000094916|CBX5	69109.9	0.48632	0.146344	3.32313	0.000890135	0.0320009
ENSG00000139211|AMIGO2	4552.4	0.368565	0.114736	3.21229	0.00131683	0.0415542
ENSG00000111665|CDCA3	2867.59	-0.587511	0.133937	-4.38648	1.152e-05	0.00112629
ENSG00000111331|OAS3	1903.59	0.429808	0.129827	3.31062	0.000930906	0.0326611
ENSG00000123374|CDK2	7315.06	0.339941	0.0935581	3.63347	0.00027963	0.0141925
ENSG00000170421|KRT8	302667	-0.609041	0.104081	-5.85162	4.86802e-09	1.76398e-06
ENSG00000120658|ENOX1	2077.54	-0.396416	0.124777	-3.17699	0.00148814	0.0446463
ENSG00000133119|RFC3	7128.85	0.391079	0.110645	3.53453	0.000408506	0.0185552
ENSG00000139734|DIAPH3	4416.89	0.482073	0.141269	3.41245	0.000643815	0.0253635
ENSG00000139496|NUP58	6834.01	0.456984	0.139557	3.27453	0.00105838	0.0358774
ENSG00000150510|FAM124A	3047.99	-0.456268	0.108231	-4.21567	2.49042e-05	0.00213537
ENSG00000139618|BRCA2	4299.61	0.833599	0.197637	4.21782	2.46676e-05	0.00212645
ENSG00000179841|AKAP5	892.221	0.670241	0.182848	3.66556	0.000246801	0.0130171
ENSG00000170345|FOS	27971	-0.446742	0.131221	-3.4045	0.00066286	0.0258718
ENSG00000175985|PLEKHD1	570.821	0.638751	0.187987	3.39785	0.000679174	0.0261776
ENSG00000033170|FUT8	10479.6	-0.448887	0.10755	-4.17374	2.99634e-05	0.00247646
ENSG00000119669|IRF2BPL	21670.8	-0.295211	0.0892988	-3.30588	0.000946795	0.0330739
ENSG00000213145|CRIP1	10629.4	-0.509616	0.131026	-3.88944	0.000100477	0.00666876
ENSG00000198604|BAZ1A	13886.8	0.424888	0.107022	3.97011	7.18397e-05	0.00510399
ENSG00000100605|ITPK1	3087.34	-0.397911	0.114352	-3.47969	0.000501989	0.0215211
ENSG00000100526|CDKN3	7083.76	-0.457513	0.108277	-4.2254	2.38515e-05	0.00207845
ENSG00000198554|WDHD1	10814.5	0.549298	0.142103	3.86549	0.000110865	0.00711042
ENSG00000182809|CRIP2	22208	-0.756505	0.124105	-6.09569	1.08967e-09	4.47993e-07
ENSG00000100867|DHRS2	729.909	-1.90236	0.192471	-9.88387	4.89084e-23	7.84197e-19
ENSG00000185215|TNFAIP2	42720.6	-0.324698	0.0868625	-3.73807	0.000185436	0.0106569
ENSG00000131979|GCH1	1569.49	0.6102	0.167416	3.64481	0.000267589	0.0138404
ENSG00000165409|TSHR	21330.2	-0.465983	0.101377	-4.59653	4.29591e-06	0.000506475
ENSG00000072415|MPP5	10031.7	0.402547	0.125535	3.20666	0.00134285	0.0418082
ENSG00000126787|DLGAP5	18186.2	-0.37665	0.108753	-3.46337	0.000533455	0.0223485
ENSG00000126803|HSPA2	2318.14	0.432743	0.1225	3.53259	0.000411507	0.0186387
ENSG00000104081|BMF	10636.2	-0.397754	0.0897869	-4.42998	9.42423e-06	0.000994133
ENSG00000137801|THBS1	15708.7	0.747686	0.148606	5.03134	4.87052e-07	8.58175e-05
ENSG00000174442|ZWILCH	17526.7	0.343427	0.105543	3.25391	0.0011383	0.0378151
ENSG00000157456|CCNB2	17268.8	-0.354997	0.0877936	-4.04354	5.26503e-05	0.00396336
ENSG00000137834|SMAD6	9855.46	-0.387378	0.113207	-3.42186	0.000621934	0.0248681
ENSG00000187720|THSD4	5320.24	-0.544219	0.101552	-5.35905	8.36619e-08	2.12926e-05
ENSG00000173546|CSPG4	852.029	0.508626	0.158342	3.21219	0.00131725	0.0415542
ENSG00000140297|GCNT3	4222.95	-0.638579	0.140406	-4.54809	5.41349e-06	0.000615922
ENSG00000256061|DNAAF4	2105.5	0.635599	0.156092	4.07196	4.66188e-05	0.00361105
ENSG00000176463|SLCO3A1	7290.86	-0.420175	0.0951784	-4.4146	1.01195e-05	0.00103783
ENSG00000140451|PIF1	3190.5	-0.992037	0.162622	-6.10028	1.05884e-09	4.46773e-07
ENSG00000140525|FANCI	9699.54	0.441502	0.0959244	4.6026	4.17251e-06	0.00049557
ENSG00000243789|JMJD7	677.072	-0.711871	0.211753	-3.36179	0.000774377	0.0288753
ENSG00000166825|ANPEP	3247.09	-0.402374	0.117034	-3.4381	0.000585811	0.0238339
ENSG00000250021|ARPIN-AP3S2	187.632	-24.2323	4.78501	-5.06422	4.10082e-07	7.75871e-05
ENSG00000259332|ST20-MTHFS	96.9713	-3.06314	0.634677	-4.8263	1.39092e-06	0.000200919
ENSG00000138615|CILP	70757.7	-0.361477	0.0834318	-4.33261	1.4735e-05	0.00138978
ENSG00000137804|NUSAP1	26814.2	-0.312019	0.0901388	-3.46153	0.000537107	0.0223696
ENSG00000140511|HAPLN3	2839.22	-0.512788	0.158836	-3.2284	0.00124483	0.0401688
ENSG00000197299|BLM	3251.26	0.54652	0.13383	4.08368	4.43284e-05	0.00351796
ENSG00000175318|GRAMD2A	4720.52	-0.393921	0.0995133	-3.95848	7.54296e-05	0.00532792
ENSG00000175265|GOLGA8A	12274.9	0.329226	0.100971	3.26059	0.00111179	0.0372938
ENSG00000215252|GOLGA8B	13433.5	0.304628	0.094589	3.22054	0.00127949	0.0410307
ENSG00000140859|KIFC3	11142.2	-0.370672	0.0945471	-3.9205	8.83642e-05	0.00611876
ENSG00000286140|DERPC	2108.28	-0.675725	0.182615	-3.70027	0.00021537	0.0118262
ENSG00000167513|CDT1	2513.62	0.553804	0.114656	4.83014	1.36439e-06	0.000200454
ENSG00000102996|MMP15	7290.39	-0.458802	0.105192	-4.36158	1.29127e-05	0.00123977
ENSG00000168140|VASN	3601.63	-0.540784	0.113082	-4.78224	1.73356e-06	0.000237571
ENSG00000052344|PRSS8	6587.47	-0.387894	0.121377	-3.19577	0.00139459	0.0430203
ENSG00000183336|BOLA2	1752.24	-0.441338	0.136756	-3.22719	0.00125011	0.0401688
ENSG00000103067|ESRP2	10557.7	-0.390449	0.0964766	-4.04708	5.18607e-05	0.00392233
ENSG00000166851|PLK1	10172.4	-0.800316	0.11473	-6.97566	3.04442e-12	2.44071e-09
ENSG00000162063|CCNF	5246.44	-0.439261	0.103243	-4.25464	2.09384e-05	0.00185484
ENSG00000072864|NDE1	1151.17	-0.459297	0.143751	-3.19509	0.00139788	0.0430203
ENSG00000205336|ADGRG1	39063.3	-0.474933	0.0934727	-5.08098	3.75495e-07	7.25385e-05
ENSG00000102935|ZNF423	714.903	-1.05586	0.209831	-5.03197	4.85456e-07	8.58175e-05
ENSG00000162039|MEIOB	178.448	-1.35315	0.379779	-3.56299	0.000366657	0.017445
ENSG00000103404|USP31	2185.6	0.386135	0.122371	3.15546	0.00160247	0.0473185
ENSG00000141738|GRB7	982.901	-0.606003	0.183679	-3.29925	0.000969429	0.0337909
ENSG00000094804|CDC6	5820.32	0.513056	0.117907	4.35137	1.3529e-05	0.00129122
ENSG00000175832|ETV4	1591.24	-0.442594	0.131688	-3.36092	0.000776841	0.028892
ENSG00000131242|RAB11FIP4	63024.3	-0.569381	0.0818583	-6.95568	3.50855e-12	2.67886e-09
ENSG00000171345|KRT19	17449.8	-0.554839	0.102019	-5.43856	5.37124e-08	1.43537e-05
ENSG00000005102|MEOX1	15133	-0.555084	0.0880473	-6.30439	2.89327e-10	1.36443e-07
ENSG00000175906|ARL4D	7350.65	-0.764631	0.0934349	-8.18357	2.75562e-16	6.31194e-13
ENSG00000049283|EPN3	8509.37	-0.353347	0.100328	-3.5219	0.000428464	0.0191365
ENSG00000176208|ATAD5	5189.51	0.565545	0.159451	3.54683	0.000389892	0.0181203
ENSG00000108960|MMD	5991.31	-0.368401	0.110352	-3.33842	0.000842559	0.0307036
ENSG00000183691|NOG	2445.17	-0.980346	0.132721	-7.3865	1.50744e-13	1.85925e-10
ENSG00000154217|PITPNC1	1472.63	-0.55232	0.133302	-4.14336	3.42251e-05	0.00281418
ENSG00000064300|NGFR	294.913	0.922952	0.247614	3.72739	0.000193476	0.0110455
ENSG00000075461|CACNG4	19971.8	-0.416582	0.0860414	-4.84164	1.28769e-06	0.000194782
ENSG00000136444|RSAD1	2593.75	-0.570509	0.138552	-4.11765	3.82755e-05	0.00309954
ENSG00000035862|TIMP2	22966.7	0.292673	0.0901504	3.24649	0.00116837	0.0383603
ENSG00000166292|TMEM100	4253.19	-0.728147	0.104878	-6.94282	3.84354e-12	2.80124e-09
ENSG00000266967|AARSD1	1727.29	-0.932389	0.238464	-3.90998	9.23055e-05	0.00626817
ENSG00000178999|AURKB	4107.13	-0.417093	0.110353	-3.77964	0.000157058	0.00929251
ENSG00000070526|ST6GALNAC1	1903.37	-0.626165	0.124385	-5.03411	4.80086e-07	8.58175e-05
ENSG00000182963|GJC1	4305.52	0.393643	0.121038	3.25223	0.00114504	0.0378547
ENSG00000180891|CUEDC1	8007.45	-0.353093	0.102318	-3.45094	0.000558647	0.0230266
ENSG00000109113|RAB34	16935.9	-0.421031	0.101869	-4.13307	3.57952e-05	0.0029134
ENSG00000076604|TRAF4	21578.6	-0.330417	0.0935621	-3.53153	0.000413168	0.0186612
ENSG00000123700|KCNJ2	177.63	1.40325	0.396365	3.54029	0.000399688	0.0183628
ENSG00000262664|OVCA2	1184.8	-0.83977	0.246678	-3.40431	0.000663309	0.0258718
ENSG00000161714|PLCD3	4820.41	-0.507744	0.10503	-4.83425	1.33646e-06	0.000198414
ENSG00000141480|ARRB2	4224.61	-0.362121	0.115518	-3.13477	0.00171987	0.0497769
ENSG00000131470|PSMC3IP	1106.35	0.688962	0.151487	4.54798	5.41631e-06	0.000615922
ENSG00000184557|SOCS3	11519.8	-0.675266	0.109047	-6.19245	5.92377e-10	2.71376e-07
ENSG00000108852|MPP2	2603.1	0.384901	0.121535	3.167	0.00154019	0.0455634
ENSG00000225663|MCRIP1	3002.09	-0.505871	0.137711	-3.67344	0.000239308	0.0127902
ENSG00000108797|CNTNAP1	732.441	0.796426	0.168405	4.72924	2.25364e-06	0.000301124
ENSG00000185262|UBALD2	6210.95	-0.492678	0.122986	-4.00597	6.1764e-05	0.00452203
ENSG00000184640|SEPTIN9	27696.5	-0.274181	0.0843907	-3.24895	0.00115832	0.0381367
ENSG00000004939|SLC4A1	12.2925	-6.93216	1.89192	-3.6641	0.000248213	0.0130487
ENSG00000161682|FAM171A2	9771.12	-0.691377	0.103382	-6.68758	2.26885e-11	1.58168e-08
ENSG00000167861|HID1	4615.83	-0.464024	0.129846	-3.57364	0.000352058	0.0169516
ENSG00000136492|BRIP1	4201.35	0.710264	0.181892	3.90487	9.42756e-05	0.00635133
ENSG00000270885|RASL10B	10828.4	-0.584505	0.100872	-5.79451	6.85204e-09	2.28887e-06
ENSG00000179761|PIPOX	838.421	-0.533071	0.16247	-3.28104	0.00103425	0.0355098
ENSG00000072310|SREBF1	10548.8	-0.356114	0.104936	-3.39363	0.000689731	0.0264573
ENSG00000168502|MTCL1	3576.85	0.460931	0.118504	3.88957	0.000100421	0.00666876
ENSG00000080986|NDC80	7845.35	-0.446601	0.101081	-4.41823	9.95104e-06	0.00102939
ENSG00000176890|TYMS	15865.5	0.332002	0.104077	3.18997	0.00142288	0.0434899
ENSG00000141682|PMAIP1	1676.61	0.754744	0.167356	4.50982	6.48823e-06	0.000717464
ENSG00000175322|ZNF519	2525.93	0.456215	0.121026	3.76955	0.000163539	0.00960507
ENSG00000215472|RPL17-C18orf32	2121.1	-1.75176	0.196294	-8.9242	4.4895e-19	1.43969e-15
ENSG00000206075|SERPINB5	1368.54	0.454693	0.134081	3.39117	0.000695937	0.0266316
ENSG00000101445|PPP1R16B	3241.35	-0.423614	0.113655	-3.72721	0.000193615	0.0110455
ENSG00000064655|EYA2	5897.52	-0.579145	0.1114	-5.19879	2.00595e-07	4.3464e-05
ENSG00000101447|FAM83D	10559.4	-0.343228	0.0929462	-3.69276	0.000221837	0.0120574
ENSG00000182463|TSHZ2	7346.13	-0.484132	0.104699	-4.62401	3.76383e-06	0.000457192
ENSG00000101144|BMP7	106469	-0.441263	0.0849373	-5.19516	2.04539e-07	4.37277e-05
ENSG00000131050|BPIFA2	1446.62	-0.463138	0.137892	-3.35871	0.000783083	0.0289308
ENSG00000130702|LAMA5	87387.7	-0.468515	0.0854914	-5.48026	4.24699e-08	1.15417e-05
ENSG00000080839|RBL1	4441.03	0.519515	0.149538	3.47413	0.000512514	0.0218555
ENSG00000197183|NOL4L	17639.4	-0.301429	0.0886336	-3.40085	0.000671771	0.0259546
ENSG00000254995|STX16-NPEPL1	434.824	1.11751	0.231159	4.83439	1.33553e-06	0.000198414
ENSG00000149636|DSN1	5208.29	0.341952	0.0975693	3.5047	0.000457114	0.0201911
ENSG00000125968|ID1	40017.4	-0.540991	0.109233	-4.95263	7.32161e-07	0.000123573
ENSG00000088325|TPX2	40361.1	-0.319848	0.0961897	-3.32518	0.000883605	0.0319093
ENSG00000171552|BCL2L1	32932.5	-0.409051	0.0953212	-4.29129	1.77639e-05	0.00163295
ENSG00000132646|PCNA	10080.4	0.325079	0.0899117	3.61553	0.000299729	0.0149294
ENSG00000101443|WFDC2	32568.9	-0.359555	0.0946899	-3.79719	0.000146348	0.00885486
ENSG00000087586|AURKA	16672.2	-0.545279	0.0861326	-6.33069	2.44067e-10	1.22293e-07
ENSG00000101224|CDC25B	20560.6	-0.302717	0.0879128	-3.44337	0.000574504	0.023499
ENSG00000099812|MISP	9168.38	-0.441048	0.113464	-3.88712	0.000101442	0.00668382
ENSG00000105289|TJP3	4122.5	-0.458851	0.133485	-3.43748	0.000587152	0.0238339
ENSG00000174898|CATSPERD	10.3366	-6.68159	2.02749	-3.29549	0.000982487	0.0341718
ENSG00000105519|CAPS	2206.31	-0.851737	0.154577	-5.51012	3.58595e-08	9.91329e-06
ENSG00000105514|RAB3D	7293.63	-0.337481	0.101549	-3.32332	0.000889521	0.0320009
ENSG00000267041|ZNF850	4024.84	0.434228	0.108583	3.99905	6.35964e-05	0.00461405
ENSG00000104856|RELB	1463.18	0.471626	0.136831	3.44677	0.000567321	0.0233242
ENSG00000177025|C19orf18	10.1808	6.92544	2.00993	3.4456	0.000569788	0.0233657
ENSG00000108106|UBE2S	20114.9	-0.518699	0.108439	-4.78331	1.72429e-06	0.000237571
ENSG00000063241|ISOC2	3236.65	-0.417802	0.127448	-3.27822	0.00104463	0.0356406
ENSG00000090339|ICAM1	1696.57	0.424534	0.133981	3.16861	0.00153171	0.0454803
ENSG00000189164|ZNF527	2680.77	0.372511	0.118858	3.13408	0.00172397	0.0498055
ENSG00000268173	198.021	2.98222	0.588946	5.06365	4.11307e-07	7.75871e-05
ENSG00000129951|PLPPR3	1089.64	-0.539562	0.167148	-3.22804	0.0012464	0.0401688
ENSG00000090661|CERS4	2900.93	-0.486174	0.14586	-3.33315	0.000858673	0.0310789
ENSG00000224420|ADM5	308.846	-0.819769	0.257488	-3.18372	0.00145397	0.0441533
ENSG00000167670|CHAF1A	6918.5	0.351467	0.0969685	3.62455	0.000289465	0.0145495
ENSG00000185361|TNFAIP8L1	972.445	-0.789355	0.153314	-5.14863	2.62399e-07	5.25913e-05
ENSG00000178531|CTXN1	4637.18	-0.562218	0.125769	-4.47026	7.81256e-06	0.000840716
ENSG00000132004|FBXW9	1540.65	-0.503529	0.147517	-3.41337	0.000641637	0.0253635
ENSG00000104998|IL27RA	996.763	0.519159	0.149908	3.46318	0.000533832	0.0223485
ENSG00000197961|ZNF121	14348.2	0.306418	0.0879226	3.48509	0.000491975	0.0211953
ENSG00000167644|C19orf33	8069.9	-0.469186	0.137097	-3.4223	0.000620941	0.0248681
ENSG00000105270|CLIP3	9031.99	-0.342183	0.0931735	-3.67253	0.000240159	0.0127931
ENSG00000167608|TMC4	7216.44	-0.530996	0.12837	-4.13646	3.527e-05	0.0028853
ENSG00000160113|NR2F6	15063.7	-0.457958	0.120246	-3.80853	0.000139798	0.0085882
ENSG00000213297|ZNF625-ZNF20	68.4815	3.82231	0.820085	4.66087	3.14872e-06	0.000400688
ENSG00000166289|PLEKHF1	7700.33	-0.384524	0.117312	-3.27779	0.00104622	0.0356406
ENSG00000167470|MIDN	11709.9	-0.46704	0.0972192	-4.80399	1.55535e-06	0.000222665
ENSG00000120784|ZFP30	2326.73	0.432899	0.130625	3.31406	0.000919528	0.0324038
ENSG00000184792|OSBP2	10932.3	-0.540353	0.0895436	-6.03453	1.59425e-09	6.23469e-07
ENSG00000100036|SLC35E4	1042.92	-0.823835	0.147808	-5.57367	2.49426e-08	7.4061e-06
ENSG00000100242|SUN2	4965.35	-0.62466	0.11685	-5.34582	9.00097e-08	2.22033e-05
ENSG00000166897|ELFN2	2714.17	0.381946	0.11812	3.23355	0.00122262	0.0396832
ENSG00000075218|GTSE1	5345.82	-0.482542	0.100735	-4.79021	1.66607e-06	0.000232859
ENSG00000100097|LGALS1	1593.67	-0.617577	0.143198	-4.31273	1.61249e-05	0.00150205
ENSG00000219438|TAFA5	160.384	-1.25056	0.345951	-3.61485	0.000300523	0.0149294
ENSG00000250479|CHCHD10	3204.13	-0.458452	0.137187	-3.3418	0.000832383	0.0304713
ENSG00000075275|CELSR1	29026.4	-0.480189	0.0981127	-4.89425	9.86794e-07	0.000161452
ENSG00000185838|GNB1L	919.793	-0.561094	0.178178	-3.14906	0.00163797	0.0479255
ENSG00000100167|SEPTIN3	2258.56	0.550335	0.118439	4.64656	3.37523e-06	0.00042613
ENSG00000167065|DUSP18	1227.97	-0.479734	0.149457	-3.20985	0.00132804	0.0417525
ENSG00000239282|CASTOR1	505.895	-0.932899	0.20157	-4.62815	3.68938e-06	0.000455042
ENSG00000099994|SUSD2	2173.76	-0.439781	0.119613	-3.6767	0.000236267	0.0127124
ENSG00000196576|PLXNB2	45309.9	-0.349084	0.0863827	-4.04113	5.31947e-05	0.00398563
ENSG00000189060|H1-0	49489.2	-0.817514	0.0849411	-9.62449	6.30203e-22	3.36823e-18
ENSG00000159147|DONSON	6541.5	0.308255	0.0968098	3.18413	0.00145188	0.0441533
ENSG00000142149|HUNK	6001.84	-0.327983	0.104487	-3.13899	0.00169533	0.0493337
ENSG00000154645|CHODL	1266.28	-0.457462	0.140095	-3.26537	0.00109321	0.0368247
ENSG00000173276|ZBTB21	2962.3	0.735512	0.159541	4.61017	4.02342e-06	0.000481429
ENSG00000182871|COL18A1	72854.6	-0.37367	0.0941287	-3.96977	7.1941e-05	0.00510399
ENSG00000183421|RIPK4	16737.6	-0.369562	0.0905219	-4.08257	4.45395e-05	0.00351796
ENSG00000160190|SLC37A1	7451.65	-0.396187	0.0966695	-4.09837	4.16071e-05	0.00333699
ENSG00000160191|PDE9A	9298.58	-0.420971	0.0962802	-4.37235	1.22917e-05	0.00118726
ENSG00000180509|KCNE1	1047.94	-0.530974	0.152228	-3.48801	0.000486627	0.0210881
ENSG00000243646|IL10RB	7947.55	-0.407452	0.095508	-4.26616	1.98867e-05	0.00179137
ENSG00000276289|KCNE1B	1618.23	-0.503728	0.130391	-3.86321	0.000111908	0.00714875

## Sheet: Adjp less 0.05 and fc 1.5
	baseMean	log2FoldChange	lfcSE	stat	pvalue	padj
ENSG00000158286|RNF207	1145.87	0.597896	0.181812	3.28853	0.00100711	0.0346525
ENSG00000169213|RAB3B	1161.23	0.978393	0.164551	5.94583	2.75058e-09	1.02565e-06
ENSG00000285839	171.543	4.15601	0.456247	9.10912	8.30512e-20	3.32911e-16
ENSG00000137941|TTLL7	1364.62	0.613736	0.156915	3.91126	9.18165e-05	0.00626817
ENSG00000152078|TLCD4	1323.01	0.650912	0.164858	3.94831	7.8705e-05	0.00551073
ENSG00000117281|CD160	82.2488	1.85046	0.544882	3.39607	0.000683603	0.0262851
ENSG00000186197|EDARADD	131.848	1.1768	0.36583	3.21678	0.00129637	0.0414064
ENSG00000132688|NES	644.72	0.736807	0.226413	3.25427	0.00113685	0.0378151
ENSG00000248672|LY75-CD302	204.647	11.2578	1.47459	7.63453	2.2665e-14	3.02842e-11
ENSG00000162924|REL	4635.24	0.705028	0.209858	3.35955	0.000780706	0.0289095
ENSG00000135913|USP37	6406.33	0.585296	0.172838	3.38638	0.00070821	0.0270367
ENSG00000135905|DOCK10	806.006	0.760329	0.223218	3.40622	0.000658697	0.0258228
ENSG00000080345|RIF1	16291.9	0.636581	0.195371	3.25832	0.00112073	0.0375152
ENSG00000188452|CERKL	44.0586	2.29744	0.675371	3.40175	0.000669555	0.0259315
ENSG00000206538|VGLL3	683.39	1.08091	0.21417	5.04697	4.48868e-07	8.36877e-05
ENSG00000169860|P2RY1	1337.65	0.621338	0.166904	3.72273	0.000197077	0.0111658
ENSG00000013297|CLDN11	465.161	0.774794	0.205602	3.76841	0.000164288	0.00961385
ENSG00000051341|POLQ	7850.57	0.642511	0.169145	3.79859	0.000145521	0.0088546
ENSG00000168386|FILIP1L	374.726	0.934885	0.270133	3.46083	0.000538522	0.0223696
ENSG00000188848|BEND4	175.407	1.24013	0.384262	3.22731	0.00124959	0.0401688
ENSG00000185477|GPRIN3	389.085	0.96247	0.28972	3.32207	0.000893527	0.032051
ENSG00000138685|FGF2	295.663	1.03981	0.277162	3.75164	0.000175678	0.010243
ENSG00000137462|TLR2	96.3212	1.5376	0.435954	3.52699	0.000420319	0.0188779
ENSG00000198780|FAM169A	827.365	0.824915	0.238339	3.4611	0.000537966	0.0223696
ENSG00000134352|IL6ST	13937.1	0.588515	0.169492	3.47224	0.000516138	0.0219516
ENSG00000131711|MAP1B	3449.9	0.64206	0.180748	3.55224	0.000381966	0.0178844
ENSG00000169247|SH3TC2	386.658	0.735755	0.221915	3.31547	0.000914877	0.0323822
ENSG00000239389|PCDHA13	21.7918	5.56671	1.74992	3.18113	0.00146701	0.0442145
ENSG00000197603|CPLANE1	6089.89	0.694543	0.206537	3.3628	0.000771564	0.0288374
ENSG00000172461|FUT9	1277.26	0.945245	0.211874	4.46135	8.14444e-06	0.00086482
ENSG00000118495|PLAGL1	1919.76	0.734334	0.137306	5.34818	8.88449e-08	2.22033e-05
ENSG00000118412|CASP8AP2	2614.04	0.697356	0.204468	3.41058	0.000648245	0.0254754
ENSG00000096060|FKBP5	3066.26	0.607413	0.134667	4.51047	6.46836e-06	0.000717464
ENSG00000146426|TIAM2	770.331	0.616347	0.17986	3.42682	0.000610684	0.0246023
ENSG00000242265|PEG10	42546.6	0.61011	0.166383	3.66689	0.000245516	0.0130083
ENSG00000170381|SEMA3E	70.7474	1.79264	0.505619	3.54544	0.000391964	0.018164
ENSG00000196584|XRCC2	7580.44	0.715319	0.153285	4.6666	3.06225e-06	0.000395969
ENSG00000105976|MET	3320.66	0.746258	0.168725	4.42294	9.73679e-06	0.00102039
ENSG00000122591|FAM126A	2417.68	0.642711	0.197532	3.2537	0.00113912	0.0378151
ENSG00000123572|NRK	267.188	1.0312	0.310547	3.32059	0.000898272	0.0321493
ENSG00000147231|RADX	896.243	0.593093	0.173436	3.41966	0.000626983	0.0249619
ENSG00000067842|ATP2B3	8.846	6.72931	2.09769	3.20797	0.00133677	0.0417812
ENSG00000265817|FSBP	1211.23	0.63281	0.183042	3.45718	0.000545869	0.0225579
ENSG00000156802|ATAD2	14002.2	0.616268	0.16981	3.62917	0.000284337	0.0143424
ENSG00000104369|JPH1	1908.93	0.643891	0.161857	3.97814	6.94576e-05	0.0049941
ENSG00000135048|CEMIP2	5396.45	0.701667	0.133496	5.2561	1.47144e-07	3.37043e-05
ENSG00000241697|TMEFF1	899.166	0.616279	0.163359	3.77255	0.000161585	0.00952522
ENSG00000167995|BEST1	15558.1	0.63428	0.130206	4.87137	1.10829e-06	0.000177704
ENSG00000023445|BIRC3	254.641	1.27576	0.299359	4.26165	2.02927e-05	0.00181773
ENSG00000149289|ZC3H12C	1443.53	0.587851	0.169634	3.46541	0.000529427	0.0222804
ENSG00000285509|TBCEL-TECTA	81.9064	1.66415	0.519414	3.20389	0.00135582	0.0420488
ENSG00000175352|NRIP3	1228.01	0.594151	0.14085	4.21833	2.46116e-05	0.00212645
ENSG00000076706|MCAM	3998.68	0.691078	0.107661	6.419	1.37169e-10	7.33123e-08
ENSG00000120539|MASTL	8001.41	0.624277	0.129288	4.82857	1.3752e-06	0.000200454
ENSG00000065328|MCM10	2660.76	0.613785	0.126276	4.86066	1.16992e-06	0.000183908
ENSG00000119906|SLF2	14897.2	0.589911	0.151786	3.88647	0.000101712	0.00668382
ENSG00000151892|GFRA1	334.718	0.936041	0.232749	4.02167	5.7788e-05	0.00428969
ENSG00000118596|SLC16A7	4301.71	0.660978	0.205798	3.21178	0.00131914	0.0415542
ENSG00000049130|KITLG	1647.69	0.592092	0.156562	3.78183	0.000155677	0.00927925
ENSG00000139618|BRCA2	4299.61	0.833599	0.197637	4.21782	2.46676e-05	0.00212645
ENSG00000179841|AKAP5	892.221	0.670241	0.182848	3.66556	0.000246801	0.0130171
ENSG00000175985|PLEKHD1	570.821	0.638751	0.187987	3.39785	0.000679174	0.0261776
ENSG00000131979|GCH1	1569.49	0.6102	0.167416	3.64481	0.000267589	0.0138404
ENSG00000137801|THBS1	15708.7	0.747686	0.148606	5.03134	4.87052e-07	8.58175e-05
ENSG00000256061|DNAAF4	2105.5	0.635599	0.156092	4.07196	4.66188e-05	0.00361105
ENSG00000064300|NGFR	294.913	0.922952	0.247614	3.72739	0.000193476	0.0110455
ENSG00000123700|KCNJ2	177.63	1.40325	0.396365	3.54029	0.000399688	0.0183628
ENSG00000131470|PSMC3IP	1106.35	0.688962	0.151487	4.54798	5.41631e-06	0.000615922
ENSG00000108797|CNTNAP1	732.441	0.796426	0.168405	4.72924	2.25364e-06	0.000301124
ENSG00000136492|BRIP1	4201.35	0.710264	0.181892	3.90487	9.42756e-05	0.00635133
ENSG00000141682|PMAIP1	1676.61	0.754744	0.167356	4.50982	6.48823e-06	0.000717464
ENSG00000254995|STX16-NPEPL1	434.824	1.11751	0.231159	4.83439	1.33553e-06	0.000198414
ENSG00000177025|C19orf18	10.1808	6.92544	2.00993	3.4456	0.000569788	0.0233657
ENSG00000268173	198.021	2.98222	0.588946	5.06365	4.11307e-07	7.75871e-05
ENSG00000213297|ZNF625-ZNF20	68.4815	3.82231	0.820085	4.66087	3.14872e-06	0.000400688
ENSG00000173276|ZBTB21	2962.3	0.735512	0.159541	4.61017	4.02342e-06	0.000481429
ENSG00000162496|DHRS3	977.077	-0.623022	0.164364	-3.79051	0.00015034	0.00906222
ENSG00000127129|EDN2	725.642	-0.713341	0.195624	-3.6465	0.000265841	0.0137945
ENSG00000123080|CDKN2C	364.986	-0.881452	0.227331	-3.87739	0.000105582	0.0068262
ENSG00000134258|VTCN1	7048.7	-0.646864	0.100159	-6.45836	1.05845e-10	6.28564e-08
ENSG00000134222|PSRC1	3869.53	-0.653483	0.109589	-5.96305	2.47573e-09	9.4514e-07
ENSG00000171517|LPAR3	8373.78	-0.632888	0.0987552	-6.40865	1.46813e-10	7.59357e-08
ENSG00000157064|NMNAT2	8132.73	-0.619197	0.116595	-5.31065	1.09235e-07	2.57842e-05
ENSG00000163545|NUAK2	12176.9	-0.773251	0.139293	-5.55125	2.83627e-08	7.97838e-06
ENSG00000170382|LRRN2	2576.69	-0.664844	0.119081	-5.58314	2.36209e-08	7.146e-06
ENSG00000186007|LEMD1	497.182	-0.743827	0.200805	-3.70422	0.000212045	0.0117645
ENSG00000134245|WNT2B	1162	-1.13023	0.159245	-7.09744	1.27086e-12	1.27356e-09
ENSG00000117318|ID3	3813.21	-0.656977	0.132413	-4.96156	6.99291e-07	0.000119281
ENSG00000158716|DUSP23	715.135	-0.634123	0.173689	-3.65092	0.000261301	0.0136029
ENSG00000085552|IGSF9	17899.3	-0.583847	0.0945747	-6.1734	6.68386e-10	2.97692e-07
ENSG00000187554|TLR5	401.677	-2.32473	0.238128	-9.76253	1.63042e-22	1.3071e-18
ENSG00000134240|HMGCS2	133.444	-1.36551	0.360367	-3.78921	0.000151128	0.00907562
ENSG00000181218|H2AW	320.193	-1.20754	0.249291	-4.8439	1.27317e-06	0.000194419
ENSG00000117399|CDC20	18222.4	-0.604172	0.103298	-5.84882	4.95068e-09	1.76398e-06
ENSG00000203814|H2BC18	1184.28	-0.672556	0.142077	-4.73376	2.20402e-06	0.000296968
ENSG00000203812|H2AC18	2645.46	-0.958595	0.133128	-7.20055	5.99681e-13	6.41019e-10
ENSG00000272196|H2AC19	2773.94	-0.93838	0.132956	-7.05783	1.69128e-12	1.58618e-09
ENSG00000184678|H2BC21	6751.15	-0.950129	0.123857	-7.67115	1.70464e-14	2.63604e-11
ENSG00000184260|H2AC20	354.237	-0.874554	0.236416	-3.69922	0.000216262	0.0118346
ENSG00000178096|BOLA1	564.887	-1.1217	0.208985	-5.36737	7.98921e-08	2.06611e-05
ENSG00000162981|LRATD1	1108.56	-0.918337	0.145239	-6.32292	2.56661e-10	1.24706e-07
ENSG00000152154|TMEM178A	707.324	-0.651866	0.170487	-3.82355	0.000131545	0.00817513
ENSG00000115163|CENPA	2799.74	-0.592761	0.11657	-5.08501	3.67604e-07	7.188e-05
ENSG00000168874|ATOH8	3705.23	-0.719185	0.138531	-5.1915	2.08602e-07	4.40096e-05
ENSG00000157856|DRC1	566.201	-0.939702	0.206877	-4.54233	5.56357e-06	0.000628213
ENSG00000270757|HSPE1-MOB4	175.152	-24.1385	4.78503	-5.04459	4.54486e-07	8.37613e-05
ENSG00000082684|SEMA5B	8592.36	-0.705895	0.100117	-7.05066	1.78067e-12	1.58618e-09
ENSG00000114315|HES1	11922.8	-0.618283	0.154298	-4.00706	6.14782e-05	0.00452175
ENSG00000178149|DALRD3	2573.05	-0.636065	0.183246	-3.47109	0.00051835	0.0219874
ENSG00000114786|ABHD14A-ACY1	553.893	-4.00515	0.982959	-4.07459	4.60959e-05	0.00358901
ENSG00000288698	286.969	-1.10548	0.251536	-4.39491	1.1082e-05	0.00109684
ENSG00000196353|CPNE4	4274.28	-0.581749	0.111445	-5.22007	1.78857e-07	3.92848e-05
ENSG00000144857|BOC	29705.3	-0.702985	0.0853798	-8.23362	1.81637e-16	4.85395e-13
ENSG00000184897|H1-10	42657.7	-0.641702	0.115443	-5.55859	2.71965e-08	7.78694e-06
ENSG00000145506|NKD2	1929.89	-0.687804	0.158115	-4.35002	1.36124e-05	0.00129149
ENSG00000112984|KIF20A	11506.3	-0.808656	0.0991975	-8.15198	3.58017e-16	7.17555e-13
ENSG00000182132|KCNIP1	163.496	-1.27284	0.334883	-3.80085	0.000144199	0.00882477
ENSG00000074317|SNCB	1443.31	-0.882032	0.144242	-6.11493	9.66015e-10	4.18624e-07
ENSG00000120738|EGR1	55734.5	-0.620656	0.184969	-3.35547	0.000792313	0.0291481
ENSG00000288622|PDCD6-AHRR	334.14	-7.3699	1.81244	-4.06629	4.77668e-05	0.00366456
ENSG00000276180|H4C9	2546.77	-0.779494	0.137188	-5.68194	1.33173e-08	4.10633e-06
ENSG00000161896|IP6K3	9.38556	-6.54252	2.04015	-3.20689	0.00134178	0.0418082
ENSG00000164488|DACT2	1581.72	-0.709508	0.161807	-4.38489	1.16043e-05	0.00112766
ENSG00000197903|H2BC12	9099.59	-0.831145	0.108454	-7.66356	1.80844e-14	2.63604e-11
ENSG00000187837|H1-2	8595.84	-0.794816	0.123755	-6.42252	1.3404e-10	7.33123e-08
ENSG00000168298|H1-4	350.965	-0.881838	0.250919	-3.51443	0.0004407	0.0195198
ENSG00000180573|H2AC6	4355.97	-0.734135	0.120601	-6.0873	1.14829e-09	4.6029e-07
ENSG00000277224|H2BC7	318.947	-1.10062	0.288687	-3.81251	0.000137564	0.00848347
ENSG00000277075|H2AC8	146.57	-1.12142	0.342717	-3.27213	0.00106739	0.0361065
ENSG00000158406|H4C8	1646.89	-0.93484	0.141199	-6.62071	3.57486e-11	2.29277e-08
ENSG00000274750|H3C6	314.074	-0.905998	0.244988	-3.69812	0.000217198	0.0118454
ENSG00000165215|CLDN3	6293.87	-0.583989	0.143704	-4.06384	4.82716e-05	0.00368565
ENSG00000206579|XKR4	329.683	-1.29549	0.266834	-4.85504	1.20364e-06	0.00018737
ENSG00000104267|CA2	23067.8	-0.677399	0.0846383	-8.00346	1.20971e-15	2.15516e-12
ENSG00000136842|TMOD1	1091.35	-0.744174	0.199705	-3.72636	0.000194265	0.0110455
ENSG00000251349|MSANTD3-TMEFF1	44.7581	-3.49635	0.753425	-4.64061	3.47384e-06	0.000431779
ENSG00000054179|ENTPD2	4437.47	-0.850515	0.121379	-7.00713	2.43264e-12	2.05289e-09
ENSG00000186193|SAPCD2	9008.84	-0.678864	0.101942	-6.65934	2.75056e-11	1.8376e-08
ENSG00000130707|ASS1	35429.3	-0.604889	0.106096	-5.70134	1.18867e-08	3.88962e-06
ENSG00000148357|HMCN2	3660.38	-0.638733	0.112104	-5.69765	1.21467e-08	3.8952e-06
ENSG00000235453|SMIM27	574.228	-1.2767	0.198619	-6.42791	1.29374e-10	7.33123e-08
ENSG00000166405|RIC3	590.307	-0.979997	0.202073	-4.84973	1.23631e-06	0.000190605
ENSG00000166407|LMO1	3466.06	-0.686976	0.117887	-5.82742	5.62898e-09	1.92032e-06
ENSG00000120457|KCNJ5	2182.31	-0.627105	0.117515	-5.33639	9.48168e-08	2.30347e-05
ENSG00000288534	293.47	-1.8829	0.442077	-4.25922	2.05143e-05	0.00182737
ENSG00000166670|MMP10	595.387	-0.824606	0.187035	-4.40882	1.03933e-05	0.00104154
ENSG00000196611|MMP1	164.569	-1.31424	0.337936	-3.88902	0.000100651	0.00666876
ENSG00000189431|RASSF10	505.792	-0.747076	0.211324	-3.53522	0.000407432	0.0185552
ENSG00000149016|TUT1	3074.67	-0.806157	0.200587	-4.01898	5.84504e-05	0.00431886
ENSG00000168000|BSCL2	2269.59	-0.686766	0.145427	-4.72242	2.3306e-06	0.000308834
ENSG00000122877|EGR2	1163.51	-1.13997	0.221759	-5.14061	2.73855e-07	5.42097e-05
ENSG00000079337|RAPGEF3	10475.9	-0.664377	0.100518	-6.60955	3.85481e-11	2.37723e-08
ENSG00000075035|WSCD2	6435	-0.699254	0.0970018	-7.20867	5.6502e-13	6.41019e-10
ENSG00000178882|RFLNA	347.186	-0.787286	0.237271	-3.31809	0.000906346	0.0322225
ENSG00000174527|MYO1H	9.4919	-6.55967	2.01734	-3.25164	0.0011474	0.0378548
ENSG00000111665|CDCA3	2867.59	-0.587511	0.133937	-4.38648	1.152e-05	0.00112629
ENSG00000170421|KRT8	302667	-0.609041	0.104081	-5.85162	4.86802e-09	1.76398e-06
ENSG00000182809|CRIP2	22208	-0.756505	0.124105	-6.09569	1.08967e-09	4.47993e-07
ENSG00000100867|DHRS2	729.909	-1.90236	0.192471	-9.88387	4.89084e-23	7.84197e-19
ENSG00000140297|GCNT3	4222.95	-0.638579	0.140406	-4.54809	5.41349e-06	0.000615922
ENSG00000140451|PIF1	3190.5	-0.992037	0.162622	-6.10028	1.05884e-09	4.46773e-07
ENSG00000243789|JMJD7	677.072	-0.711871	0.211753	-3.36179	0.000774377	0.0288753
ENSG00000250021|ARPIN-AP3S2	187.632	-24.2323	4.78501	-5.06422	4.10082e-07	7.75871e-05
ENSG00000259332|ST20-MTHFS	96.9713	-3.06314	0.634677	-4.8263	1.39092e-06	0.000200919
ENSG00000286140|DERPC	2108.28	-0.675725	0.182615	-3.70027	0.00021537	0.0118262
ENSG00000166851|PLK1	10172.4	-0.800316	0.11473	-6.97566	3.04442e-12	2.44071e-09
ENSG00000102935|ZNF423	714.903	-1.05586	0.209831	-5.03197	4.85456e-07	8.58175e-05
ENSG00000162039|MEIOB	178.448	-1.35315	0.379779	-3.56299	0.000366657	0.017445
ENSG00000141738|GRB7	982.901	-0.606003	0.183679	-3.29925	0.000969429	0.0337909
ENSG00000175906|ARL4D	7350.65	-0.764631	0.0934349	-8.18357	2.75562e-16	6.31194e-13
ENSG00000183691|NOG	2445.17	-0.980346	0.132721	-7.3865	1.50744e-13	1.85925e-10
ENSG00000166292|TMEM100	4253.19	-0.728147	0.104878	-6.94282	3.84354e-12	2.80124e-09
ENSG00000266967|AARSD1	1727.29	-0.932389	0.238464	-3.90998	9.23055e-05	0.00626817
ENSG00000070526|ST6GALNAC1	1903.37	-0.626165	0.124385	-5.03411	4.80086e-07	8.58175e-05
ENSG00000262664|OVCA2	1184.8	-0.83977	0.246678	-3.40431	0.000663309	0.0258718
ENSG00000184557|SOCS3	11519.8	-0.675266	0.109047	-6.19245	5.92377e-10	2.71376e-07
ENSG00000004939|SLC4A1	12.2925	-6.93216	1.89192	-3.6641	0.000248213	0.0130487
ENSG00000161682|FAM171A2	9771.12	-0.691377	0.103382	-6.68758	2.26885e-11	1.58168e-08
ENSG00000270885|RASL10B	10828.4	-0.584505	0.100872	-5.79451	6.85204e-09	2.28887e-06
ENSG00000215472|RPL17-C18orf32	2121.1	-1.75176	0.196294	-8.9242	4.4895e-19	1.43969e-15
ENSG00000174898|CATSPERD	10.3366	-6.68159	2.02749	-3.29549	0.000982487	0.0341718
ENSG00000105519|CAPS	2206.31	-0.851737	0.154577	-5.51012	3.58595e-08	9.91329e-06
ENSG00000224420|ADM5	308.846	-0.819769	0.257488	-3.18372	0.00145397	0.0441533
ENSG00000185361|TNFAIP8L1	972.445	-0.789355	0.153314	-5.14863	2.62399e-07	5.25913e-05
ENSG00000100036|SLC35E4	1042.92	-0.823835	0.147808	-5.57367	2.49426e-08	7.4061e-06
ENSG00000100242|SUN2	4965.35	-0.62466	0.11685	-5.34582	9.00097e-08	2.22033e-05
ENSG00000100097|LGALS1	1593.67	-0.617577	0.143198	-4.31273	1.61249e-05	0.00150205
ENSG00000219438|TAFA5	160.384	-1.25056	0.345951	-3.61485	0.000300523	0.0149294
ENSG00000239282|CASTOR1	505.895	-0.932899	0.20157	-4.62815	3.68938e-06	0.000455042
ENSG00000189060|H1-0	49489.2	-0.817514	0.0849411	-9.62449	6.30203e-22	3.36823e-18
